# Supplementary material for: Structural and physical properties of 99 complex bulk chalcogenides crystals using first-principles calculations
Source: PubMed Central journal article supplement (PMC8110807; doi:10.1038/s41598-021-89281-6), 2021-05-10
Supplement: 41598_2021_89281_MOESM1_ESM.pdf [file 41598_2021_89281_MOESM1_ESM.pdf]

# A comprehensive library of bulk chalcogenides: structural, electronic, optical and elastic properties using first-principles calculations

Sahib Hasan<sup>1</sup>, Khagendra Baral<sup>1</sup>, Neng Li<sup>2</sup> and Wai-Yim Ching<sup>1\*</sup>

1. Department of Physics and Astronomy, University of Missouri-Kansas City, Kansas City, Missouri, 64110 USA
  2. School of Materials Science and Engineering, Wuhan University of Technology, No. 122, Luoshi Road, Wuhan, 430070, China
- \* Corresponding Author e-mail: [Chingw@umkc.edu](mailto:Chingw@umkc.edu); [lineng@whut.edu.cn](mailto:lineng@whut.edu.cn)

## 1. Optical properties

We can use OLCAO method to calculate the optical properties of crystalline chalcogenides based on the theory of inter-band optical absorptions within the random phase approximation. According to this approach, the optical conductivity is given by:

$$\sigma_1(\hbar\omega) = \frac{2\pi e\hbar^2}{3m^2\omega\Omega} \sum_{n,l} |\langle n|\vec{p}|l\rangle|^2 f_l [1 - f_n] \delta(E_n - E_l - \hbar\omega) \quad (1)$$

$f_l$  is the Fermi-Dirac function of the occupied band state  $l$  and  $\delta$  function makes sure that the energy is conserved in the transition process between occupied state and unoccupied state with energy  $E_l$  and  $E_n$  respectively.  $\Omega$  is the volume of the unit cell.

There is no intra-band transitions for the materials with an energy gap in their band structure, so that the optical properties can be described by the complex dielectric function which is related to the  $\sigma_1(\hbar\omega)$  by:

$$\varepsilon_2(\omega) = 4\pi \frac{\sigma_1(\omega)}{\omega} \quad (2)$$

By transforming the summation over the unit cell in the equation (3) to an integral over the BZ in  $\mathbf{k}$  space,  $\varepsilon_2(\omega)$  can be given by:

$$\varepsilon_2(\hbar\omega) = \frac{e^2}{\pi m\omega^2} \int dk^3 \sum_{n,l} |\langle \Psi_n(\vec{k}, \vec{r}) | -i\hbar\vec{\nabla} | \Psi_l(\vec{k}, \vec{r}) \rangle|^2 f_l(\vec{k}) [1 - f_n(\vec{k})] \delta(E_n(\vec{k}) - E_l(\vec{k}) - \hbar\omega) \quad (3)$$

The real part of the dielectric function can be derived from  $\varepsilon_2$  by using Kramers-Kronig relation:

$$\varepsilon_1(\hbar\omega) = 1 + \frac{2}{\pi} P \int_0^\infty \frac{s\varepsilon_2(\hbar\omega)}{s^2 - \omega^2} ds \quad (4)$$

In OLCAO method, the momentum matrices in the Eqs (2) and (4) for the optical transitions can be easily calculated as sums of two –center integrals between GTOs[1].

## 2. Mechanical properties

Ab initio calculation method within DFT for the mechanical properties is very powerful method these days. In this section, and to calculate the mechanical properties for the seven crystals, we followed the method of the Hongzhi Yao. et al. work[2]. In this work, a scheme has been applied to calculate the elastic constants of crystals. Starting with the simple Hook's famous law that can relate the stress components  $\sigma_i$  with the strain components  $\varepsilon_j$  by relation:

$$\sigma_i = \sum_{j=1}^6 C_{ij} \varepsilon_j \quad (5)$$

$C_{ij}$  is the elastic constants of the crystals. From knowing the elastic constants, we could calculate other mechanical properties like compliance tensor  $S_{ij}$ , Young's modulus (E), Bulk modulus (K), Shear modulus (G), and Poisson's ratio ( $\eta$ ). Here, Voigt – Reuss –Hill (VRH)[3, 4] approximation has been used to derive the above mechanical properties. According to this approximation, the upper and lower bounds for the structural parameters, like bulk and shear modulus are respectively given by:

$$K_V = \frac{(C_{11}+C_{22}+C_{33})}{9} + \frac{2(C_{12}+C_{13}+C_{23})}{9} \quad (6)$$

$$K_R = \frac{1}{(S_{11}+S_{22}+S_{33})+2(S_{12}+S_{13}+S_{23})} \quad (7)$$

$$G_V = \frac{(C_{11}+C_{22}+C_{33}-C_{12}-C_{13}-C_{23})}{15} + \frac{(C_{44}+C_{55}+C_{66})}{5} \quad (8)$$

$$G_R = \frac{15}{4(S_{11}+S_{22}+S_{33})-4(S_{12}+S_{13}+S_{23})+3(S_{44}+S_{55}+S_{66})} \quad (9)$$

So, the average values of the mechanical properties are given by:

$$K = \frac{(K_V+K_R)}{2} \quad (10)$$

$$G = \frac{(G_V+G_R)}{2} \quad (11)$$

$$E = \frac{9KG}{(3K+G)} \quad (12)$$

$$\eta = \frac{(3K-2G)}{2(3K+G)} \quad (13)$$

### 3. The Supplementary Tables

**Table S1** The symmetry, lattice parameters after full VASP relaxation, and the experimental lattice parameters data of the 99 crystals used in our calculations, where GGA has been used as an exchange and correlation potential. (M for monoclinic, T for triclinic, Tr for Trigonal, Tet for tetragonal, O for orthorhombic. The full relaxed crystal structure data are available upon request with a corresponding author. They can also be found on the web site of our research group: [https://info.umkc.edu/ching-esg/?page\\_id=152](https://info.umkc.edu/ching-esg/?page_id=152)

| #  | Crystal                             | Space group                | Lattice parameters(our calculations)<br>a, b, c(Å) in 4 decimal points, $\alpha$ , $\beta$ , $\gamma$ (deg.)<br>in 2 decimal points | Lattice parameters(experimental)<br>a, b, c(Å) in 4 decimal points, $\alpha$ , $\beta$ , $\gamma$ (deg.) in 2<br>decimal points |
|----|-------------------------------------|----------------------------|-------------------------------------------------------------------------------------------------------------------------------------|---------------------------------------------------------------------------------------------------------------------------------|
| 1  | Cu <sub>2</sub> ZnSiS <sub>4</sub>  | O, Pmn2 <sub>1</sub> (31)  | 7.3849, 6.4683, 6.1669, 90.00, 90.00, 90.00                                                                                         | 7.4374, 6.4001, 6.1394, 90.00, 90.00, 90.00[5]                                                                                  |
| 2  | Cu <sub>2</sub> ZnSiSe <sub>4</sub> | O, Pmn2 <sub>1</sub> (31)  | 7.8439, 6.8452, 6.5190, 90.00, 90.00, 90.00                                                                                         | 7.8287, 6.7342, 6.4568, 90.00, 90.00, 90.00[6]                                                                                  |
| 3  | Cu <sub>2</sub> ZnSiTe <sub>4</sub> | Tet, I -4 2 m(121)         | 6.0501, 6.0501, 11.982, 90.00, 90.00, 90.00                                                                                         | 5.9612, 5.9612, 11.7887, 90.00, 90.00, 90.00[7]                                                                                 |
| 4  | Cu <sub>2</sub> ZnGeS <sub>4</sub>  | O, Pmn2 <sub>1</sub> (31)  | 7.5152, 6.5574, 6.2375, 90.00, 90.00, 90.00                                                                                         | 7.5090, 6.4790, 6.1920, 90.00, 90.00, 90.00[8]                                                                                  |
| 5  | Cu <sub>2</sub> ZnGeSe <sub>4</sub> | Tet, I -4(82)              | 5.6726, 5.6726, 11.2758, 90.00, 90.00, 90.00                                                                                        | 5.6112, 5.6112, 11.0473, 90.00, 90.00, 90.00[9]                                                                                 |
| 6  | Cu <sub>2</sub> ZnSnS <sub>4</sub>  | Tet, I -4(82)              | 5.4704, 5.4704, 10.9424, 90.00, 90.00, 90.00                                                                                        | 5.4280, 5.4280, 10.8640, 90.00, 90.00, 90.00[10]                                                                                |
| 7  | Cu <sub>2</sub> ZnSnSe <sub>4</sub> | Tet, I -4(82)              | 5.7674, 5.7674, 11.5315, 90.00, 90.00, 90.00                                                                                        | 5.6920, 5.6920, 11.3400, 90.00, 90.00, 90.00[11]                                                                                |
| 8  | Cu <sub>2</sub> ZnSnTe <sub>4</sub> | Tet, I -4(82)              | 6.1880, 6.1880, 12.3655, 90.00, 90.00, 90.00                                                                                        | 6.1300, 6.1300, 12.2071, 90.00, 90.00, 90.00[12]                                                                                |
| 9  | Cu <sub>2</sub> CdSiS <sub>4</sub>  | O, Pmn2 <sub>1</sub> (31)  | 7.6707, 6.5086, 6.2901, 90.00, 90.00, 90.00                                                                                         | 7.5980, 6.4860, 6.2580, 90.00, 90.00, 90.00[13]                                                                                 |
| 10 | Cu <sub>2</sub> CdSiSe <sub>4</sub> | O, Pmn2 <sub>1</sub> (31)  | 8.1096, 6.8922, 6.6344, 90.00, 90.00, 90.00                                                                                         | 7.9900, 6.8240, 6.2640, 90.00, 90.00, 90.00[14]                                                                                 |
| 11 | Cu <sub>2</sub> CdGeS <sub>4</sub>  | O, Pmn2 <sub>1</sub> (31)  | 7.7804, 6.6253, 6.3608, 90.00, 90.00, 90.00                                                                                         | 7.6920, 6.5550, 6.2990, 90.00, 90.00, 90.00[15]                                                                                 |
| 12 | Cu <sub>2</sub> CdGeSe <sub>4</sub> | Tet, I -4 2 m(121)         | 5.8449, 5.8449, 11.2495, 90.00, 90.00, 90.00                                                                                        | 5.7482, 5.7482, 11.0533, 90.00, 90.00, 90.00[16]                                                                                |
| 13 | Cu <sub>2</sub> CdGeTe <sub>4</sub> | Tet, I -4 2 m(121)         | 6.2531, 6.2531, 12.1218, 90.00, 90.00, 90.00                                                                                        | 6.1270, 6.1270, 11.9190, 90.00, 90.00, 90.00[17]                                                                                |
| 14 | Cu <sub>2</sub> CdSnS <sub>4</sub>  | Tet, I -4(82)              | 5.5763, 5.5763, 11.2449, 90.00, 90.00, 90.00                                                                                        | 5.4870, 5.4870, 10.8450, 90.00, 90.00, 90.00[18]                                                                                |
| 15 | Cu <sub>2</sub> CdSnSe <sub>4</sub> | Tet, I -4(82)              | 5.8715, 5.8715, 11.8107, 90.00, 90.00, 90.00                                                                                        | 5.8320, 5.8320, 11.3900, 90.00, 90.00, 90.00[18]                                                                                |
| 16 | Cu <sub>2</sub> CdSnTe <sub>4</sub> | Tet, I -4(82)              | 6.2917, 6.2917, 12.5987, 90.00, 90.00, 90.00                                                                                        | 6.1980, 6.1980, 12.2560, 90.00, 90.00, 90.00[18]                                                                                |
| 17 | Cu <sub>2</sub> HgGeS <sub>4</sub>  | Tet, I -4 2 m(121)         | 5.5658, 5.5658, 10.6581, 90.00, 90.00, 90.00                                                                                        | 5.4930, 5.4930, 10.5510, 90.00, 90.00, 90.00[19]                                                                                |
| 18 | Cu <sub>2</sub> HgGeSe <sub>4</sub> | Tet, I -4 2 m(121)         | 5.8695, 5.8695, 11.2322, 90.00, 90.00, 90.00                                                                                        | 5.7445, 5.7445, 11.0824, 90.00, 90.00, 90.00[20]                                                                                |
| 19 | Cu <sub>2</sub> HgGeTe <sub>4</sub> | Tet, I -4 2 m(121)         | 6.2629, 6.2629, 12.1144, 90.00, 90.00, 90.00                                                                                        | 6.12940, 6.12940, 11.9374, 90.00, 90.00, 90.00[21]                                                                              |
| 20 | Cu <sub>2</sub> HgSnS <sub>4</sub>  | Tet, I -4(82)              | 5.6439, 5.6439, 11.0670, 90.00, 90.00, 90.00                                                                                        | 5.5749, 5.5749, 10.8820, 90.00, 90.00, 90.00[22]                                                                                |
| 21 | Cu <sub>2</sub> HgSnSe <sub>4</sub> | Tet, I -4 2 m(121)         | 5.9393, 5.9393, 11.6174, 90.00, 90.00, 90.00                                                                                        | 5.8288, 5.8288, 11.4179, 90.00, 90.00, 90.00[23]                                                                                |
| 22 | Cu <sub>2</sub> HgSnTe <sub>4</sub> | Tet, I -4 2 m(121)         | 6.3310, 6.3310, 12.4851, 90.00, 90.00, 90.00                                                                                        | 6.1957, 6.1957, 12.2874, 90.00, 90.00, 90.00[24]                                                                                |
| 23 | Cu <sub>2</sub> BaGeS <sub>4</sub>  | Tr, P 3 <sub>1</sub> (144) | 6.5328, 6.5328, 15.2783, 90.00, 90.00, 119.99                                                                                       | 6.2150, 6.2150, 15.5340, 90.00, 90.00, 120.00[25]                                                                               |
| 24 | Cu <sub>2</sub> BaGeSe <sub>4</sub> | Tr, P 3 <sub>1</sub> (144) | 6.6141, 6.6141, 16.4332, 90.00, 90.00, 119.99                                                                                       | 6.4900, 6.4900, 16.3550, 90.00, 90.00, 120.00[26]                                                                               |
| 25 | Cu <sub>2</sub> SrSiS <sub>4</sub>  | Tr, P 3 <sub>1</sub> (144) | 6.1049, 6.1049, 15.1617, 90.00, 90.00, 120.00                                                                                       | 6.0687, 6.0687, 15.1373, 90.00, 90.00, 120.00[27]                                                                               |
| 26 | Cu <sub>2</sub> SrGeS <sub>4</sub>  | Tr, P 3 <sub>2</sub> (145) | 6.2025, 6.2025, 15.3469, 90.00, 90.00, 120.00                                                                                       | 6.1430, 6.1430, 15.2820, 90.00, 90.00, 120.00[25]                                                                               |
| 27 | Cu <sub>2</sub> SrGeSe <sub>4</sub> | O, Ama2(40)                | 10.9140, 10.8817, 6.6361, 90.00, 90.00, 90.00                                                                                       | 10.8070, 10.7350, 6.5410, 90.00, 90.00, 90.00[26]                                                                               |
| 28 | Cu <sub>2</sub> BaSnS <sub>4</sub>  | Tr, P 3 <sub>1</sub> (144) | 6.8386, 6.8386, 16.0392, 90.00, 90.00, 120.00                                                                                       | 6.3660, 6.3660, 15.8280, 90.00, 90.00, 120.00[25]                                                                               |
| 29 | Cu <sub>2</sub> BaSnSe <sub>4</sub> | O, Ama2(40)                | 11.2245, 11.4509, 6.8533, 90.00, 90.00, 90.00                                                                                       | 11.1110, 11.2270, 6.7440, 90.00, 90.00, 90.00[25]                                                                               |
| 30 | Cu <sub>2</sub> SrSnS <sub>4</sub>  | Tr, P 3 <sub>1</sub> (144) | 6.3616, 6.3616, 15.6245, 90.00, 90.00, 119.99                                                                                       | 6.367, 6.367, 15.833, 90.00, 90.00, 120.00[28]                                                                                  |
| 31 | Cu <sub>2</sub> SrSnSe <sub>4</sub> | O, Ama2(40)                | 11.1162, 10.9248, 6.7886, 90.00, 90.00, 90.00                                                                                       | 10.9670, 10.7540, 6.6950, 90.00, 90.00, 90.00[25]                                                                               |
| 32 | Cu <sub>2</sub> MgSiS <sub>4</sub>  | O, Pmn2 <sub>1</sub> (31)  | 7.5952, 6.4612, 6.2147, 90.00, 90.00, 90.00                                                                                         | 7.5630, 6.4480, 6.1790, 90.00, 90.00, 90.00[29]                                                                                 |
| 33 | Cu <sub>2</sub> MgSiSe <sub>4</sub> | O, Pmn2 <sub>1</sub> (31)  | 8.0300, 6.8564, 6.5743, 90.00, 90.00, 90.00                                                                                         | 7.9530, 6.7970, 6.5070, 90.00, 90.00, 90.00[30]                                                                                 |
| 34 | Cu <sub>2</sub> MgGeS <sub>4</sub>  | O, Pmn2 <sub>1</sub> (31)  | 7.6930, 6.5724, 6.2865, 90.00, 90.00, 90.00                                                                                         | 7.6380, 6.5150, 6.2250, 90.00, 90.00, 90.00[29]                                                                                 |
| 35 | Cu <sub>2</sub> MgSnS <sub>4</sub>  | Tet, I -4(82)              | 5.5091, 5.5091, 11.1542, 90.00, 90.00, 90.00                                                                                        | 5.4360, 5.4360, 11.0180, 90.00, 90.00, 90.00[31]                                                                                |
| 36 | Cu <sub>2</sub> MgSnSe <sub>4</sub> | Tet, I -4(82)              | 5.8184, 5.8184, 11.7249, 90.00, 90.00, 90.00                                                                                        | 5.7260, 5.7260, 11.5600, 90.00, 90.00, 90.00[32]                                                                                |
| 37 | Cu <sub>2</sub> MgSnTe <sub>4</sub> | Tet, I -4(82)              | 6.2692, 6.2692, 12.5476, 90.00, 90.00, 90.00                                                                                        | 6.1730, 6.1730, 12.3398, 90.00, 90.00, 90.00[32]                                                                                |
| 38 | Ag <sub>2</sub> ZnSiS <sub>4</sub>  | M, Pn(7)                   | 6.6957, 7.7129, 8.1202, 90.00, 90.52, 90.00                                                                                         | 6.4052, 6.5484, 7.9340, 90.00, 90.45, 90.00[33]                                                                                 |
| 39 | Ag <sub>2</sub> ZnSnS <sub>4</sub>  | Tet, I -4(82)              | 5.8408, 5.8408, 11.0654, 90.00, 90.00, 90.00                                                                                        | 5.8126, 5.8126, 10.7788, 90.00, 90.00, 90.00[34]                                                                                |
| 40 | Ag <sub>2</sub> ZnSnSe <sub>4</sub> | Tet, I -4(82)              | 6.1106, 6.1106, 11.6683, 90.00, 90.00, 90.00                                                                                        | 6.0442, 6.0442, 11.3065, 90.00, 90.00, 90.00[34]                                                                                |
| 41 | Ag <sub>2</sub> CdGeS <sub>4</sub>  | O, Pna2 <sub>1</sub> (33)  | 13.9844, 8.1157, 6.6928, 90.00, 90.00, 90.00                                                                                        | 13.7415, 8.0367, 6.5907, 90.00, 90.00, 90.00[35]                                                                                |
| 42 | Ag <sub>2</sub> CdSnS <sub>4</sub>  | Tet, I -4(82)              | 5.9150, 5.9150, 11.5511, 90.00, 90.00, 90.00                                                                                        | 5.9180, 5.9180, 11.5520, 90.00, 90.00, 90.00[36]                                                                                |
| 43 | Ag <sub>2</sub> CdSnSe <sub>4</sub> | Tet, I -4(82)              | 6.1844, 6.1844, 12.1072, 90.00, 90.00, 90.00                                                                                        | 6.1780, 6.1780, 12.1080, 90.00, 90.00, 90.00[37]                                                                                |
| 44 | Ag <sub>2</sub> CdSnTe <sub>4</sub> | Tet, I -4(82)              | 6.5545, 6.5545, 12.9953, 90.00, 90.00, 90.00                                                                                        | 6.5630, 6.5630, 12.9940, 90.00, 90.00, 90.00[37]                                                                                |
| 45 | Ag <sub>2</sub> HgSnS <sub>4</sub>  | O, Pmn2 <sub>1</sub> (31)  | 8.1896, 7.2620, 6.8447, 90.00, 90.00, 90.00                                                                                         | 8.2074, 7.0330, 6.7180, 90.00, 90.00, 90.00[38]                                                                                 |
| 46 | Ag <sub>2</sub> HgSnSe <sub>4</sub> | O, Pmn2 <sub>1</sub> (31)  | 8.6148, 7.5571, 7.1617, 90.00, 90.00, 90.00                                                                                         | 8.4610, 7.3400, 6.9901, 90.00, 90.00, 90.00[39]                                                                                 |

|    |                                                   |                                                       |                                                  |                                                      |
|----|---------------------------------------------------|-------------------------------------------------------|--------------------------------------------------|------------------------------------------------------|
| 47 | Ag <sub>2</sub> BaGeSe <sub>4</sub>               | Tet, I -4 2 m(121)                                    | 6.8499, 6.8499, 8.3308, 90.00, 90.00, 90.00      | 6.8280, 6.8280, 8.0170, 90.00, 90.00, 90.00[25]      |
| 48 | Ag <sub>2</sub> BaGeSe <sub>4</sub>               | O, I 222(23)                                          | 7.0516, 7.5208, 8.4835, 90.00, 90.00, 90.00      | 7.0580, 7.2630, 8.2630, 90.00, 90.00, 90.00[25]      |
| 49 | Ag <sub>2</sub> BaSnS <sub>4</sub>                | O, I 222(23)                                          | 7.3760, 8.3261, 6.8488, 90.00, 90.00, 90.00      | 7.1270, 8.1170, 6.8540, 90.00, 90.00, 90.00[25]      |
| 50 | Ag <sub>2</sub> BaSnSe <sub>4</sub>               | O, I 222(23)                                          | 7.1503, 7.7114, 8.5929, 90.00, 90.00, 90.00      | 7.1160, 7.4990, 8.3370, 90.00, 90.00, 90.00[25]      |
| 51 | Ag <sub>2</sub> SrGeSe <sub>4</sub>               | O, I 222(23)                                          | 7.0432, 7.7739, 6.8062, 90.00, 90.00, 90.00      | 6.8200, 6.9730, 7.6900, 90.00, 90.00, 90.00[25]      |
| 52 | Ag <sub>2</sub> SrGeSe <sub>4</sub>               | O, I 222(23)                                          | 7.1171, 7.4129, 8.0634, 90.00, 90.00, 90.00      | 7.1150, 7.3890, 7.9510, 90.00, 90.00, 90.00[25]      |
| 53 | Ag <sub>2</sub> SrSnS <sub>4</sub>                | O, I 222(23)                                          | 7.2909, 7.8802, 6.8971, 90.00, 90.00, 90.00      | 6.9100, 7.2100, 7.8310, 90.00, 90.00, 90.00[25]      |
| 54 | Ag <sub>2</sub> SrSnSe <sub>4</sub>               | O, I 222(23)                                          | 7.1924, 7.6542, 8.1501, 90.00, 90.00, 90.00      | 7.1930, 7.6570, 8.0340, 90.00, 90.00, 90.00[25]      |
| 55 | Ag <sub>2</sub> In <sub>2</sub> SiS <sub>6</sub>  | M, C1c1(9)                                            | 12.4013, 7.2787, 12.3814, 90.00, 109.43, 90.00   | 12.1481, 7.1726, 12.1263, 90.00, 109.25, 90.00[40]   |
| 56 | Ag <sub>2</sub> In <sub>2</sub> GeSe <sub>6</sub> | M, C1c1(9)                                            | 12.4988, 7.3491, 12.4713, 90.00, 109.50, 90.00   | 12.2316, 7.2190, 12.2124, 90.00, 109.50, 90.00[40]   |
| 57 | Ag <sub>2</sub> In <sub>2</sub> SiSe <sub>6</sub> | M, C1c1(9)                                            | 12.9619, 7.6205, 12.9006, 90.00, 109.39, 90.00   | 12.6683, 7.4565, 12.6133, 90.00, 109.29, 90.00[41]   |
| 58 | Ag <sub>2</sub> In <sub>2</sub> GeSe <sub>6</sub> | M, C1c1(9)                                            | 13.0354, 7.6909, 12.9695, 90.00, 109.47, 90.00   | 12.6920, 7.4920, 12.6440, 90.00, 109.50, 90.00[41]   |
| 59 | Ag <sub>2</sub> SiS <sub>3</sub>                  | M, P12 <sub>1</sub> /c1(14)                           | 6.6871, 6.6825, 13.4925, 90.00, 118.21, 90.00    | 6.6709, 6.6567, 13.1748, 90.00, 118.66, 90.00[42]    |
| 60 | Ag <sub>2</sub> GeS <sub>3</sub>                  | O, Cmc21(36)                                          | 11.9886, 7.0452, 6.5496, 90.00, 90.00, 90.00     | 11.7895, 7.0751, 6.3420, 90.00, 90.00, 90.00[43]     |
| 61 | Cu <sub>2</sub> GeS <sub>3</sub>                  | M, C1c1(9)                                            | 6.5056, 11.3409, 6.5456, 90.00, 109.20, 90.00    | 6.4490, 11.3190, 6.4280, 90.00, 108.37, 90.00[44]    |
| 62 | Cu <sub>2</sub> GeSe <sub>3</sub>                 | O, I mm2(44)                                          | 11.8886, 4.0560, 5.5967, 90.00, 90.00, 90.00     | 11.8540, 3.9540, 5.4890, 90.00, 90.00, 90.00[45]     |
| 63 | Ag <sub>2</sub> SnSe <sub>3</sub>                 | M, P12 <sub>1</sub> /m1(10)                           | 8.3969, 9.2348, 12.9899, 90.00, 105.61, 90.00    | 7.9770, 7.9120, 13.0230, 90.00, 101.73, 90.00[46]    |
| 64 | Ag <sub>2</sub> SnTe <sub>3</sub>                 | M, C1c1(9)                                            | 7.9259, 13.8274, 7.9704, 90.00, 109.03, 90.00    | 7.4420, 12.8377, 7.4025, 90.00, 109.54, 90.00[47]    |
| 65 | Ag <sub>4</sub> P <sub>2</sub> S <sub>6</sub>     | O, P2 <sub>1</sub> 2 <sub>1</sub> 2 <sub>1</sub> (19) | 14.3859, 11.2296, 6.3246, 90.00, 90.00, 90.00    | 13.9010, 11.0730, 6.3030, 90.00, 90.00, 90.00[48]    |
| 66 | Ag <sub>4</sub> P <sub>2</sub> Se <sub>6</sub>    | M, C1c1(9)                                            | 14.6566, 11.7643, 6.6156, 90.00, 90.00, 90.00    | 14.1690, 11.5980, 6.5850, 90.00, 90.00, 90.00[49]    |
| 67 | BaZnSiSe <sub>4</sub>                             | O, Ama2(40)                                           | 11.5432, 11.4761, 6.2595, 90.00, 90.00, 90.00    | 11.3055, 11.2344, 6.1994, 90.00, 90.00, 90.00[50]    |
| 68 | BaZnGeSe <sub>4</sub>                             | O, Ama2(40)                                           | 11.5889, 11.5015, 6.3670, 90.00, 90.00, 90.00    | 11.3255, 11.2527, 6.2917, 90.00, 90.00, 90.00[50]    |
| 69 | BaHg <sub>2</sub> As <sub>2</sub> S <sub>6</sub>  | O, Cmca(64)                                           | 8.3779, 8.4205, 16.5401, 90.00, 90.00, 90.00     | 8.1304, 7.9417, 16.3280, 90.00, 90.00, 90.00[51]     |
| 70 | BaCd <sub>2</sub> As <sub>2</sub> S <sub>6</sub>  | O, Cmca(64)                                           | 8.1111, 8.1509, 17.1184, 90.00, 90.00, 90.00     | 7.9544, 7.8649, 16.9790, 90.00, 90.00, 90.00[51]     |
| 71 | Ba <sub>2</sub> AlSbS <sub>5</sub>                | O, Pnma(62)                                           | 12.3352, 8.9488, 9.1673, 90.00, 90.00, 90.00     | 12.1400, 8.8911, 8.9552, 90.00, 90.00, 90.00[52]     |
| 72 | Ba <sub>2</sub> GaBiSe <sub>5</sub>               | O, Pnma(62)                                           | 12.9159, 9.2489, 9.5312, 90.00, 90.00, 90.00     | 12.6910, 9.1900, 9.2450, 90.00, 90.00, 90.00[52]     |
| 73 | Ba <sub>2</sub> AsGaSe <sub>5</sub>               | O, Pnma(62)                                           | 12.9076, 9.1005, 9.4202, 90.00, 90.00, 90.00     | 12.6320, 8.9726, 9.2029, 90.00, 90.00, 90.00[53]     |
| 74 | Ba <sub>2</sub> LaGaSe <sub>5</sub>               | O, Pnma(62)                                           | 12.7079, 9.5926, 8.9275, 90.00, 90.00, 90.00     | 12.5049, 9.6288, 8.7355, 90.00, 90.00, 90.00[54]     |
| 75 | Ba <sub>2</sub> LuGaSe <sub>5</sub>               | T, P-1(2)                                             | 7.3981, 8.7027, 9.5441, 103.29, 102.87, 107.25   | 7.2829, 8.6120, 9.3681, 103.36, 103.05, 107.31[54]   |
| 76 | Ba <sub>2</sub> LuInSe <sub>5</sub>               | O, Cmc21(36)                                          | 4.2872, 19.1369, 13.4878, 90.00, 90.00, 90.00    | 4.2345, 18.7530, 13.2854, 90.00, 90.00, 90.00[54]    |
| 77 | Ba <sub>4</sub> AgInS <sub>6</sub>                | M, P12 <sub>1</sub> /c1(14)                           | 8.8287, 9.0183, 18.0285, 90.00, 104.12, 90.00    | 8.7241, 8.8799, 17.7930, 90.00, 104.14, 90.00[55]    |
| 78 | CsCu <sub>5</sub> S <sub>3</sub>                  | O, Pmma(51)                                           | 9.6935, 3.9345, 9.1146, 90.00, 90.00, 90.00      | 9.6365, 3.9547, 8.9490, 90.00, 90.00, 90.00[56]      |
| 79 | CsCu <sub>5</sub> Se <sub>3</sub>                 | O, Pmma(51)                                           | 10.1783, 4.0949, 9.1844, 90.00, 90.00, 90.00     | 9.9909, 4.0978, 9.0071, 90.00, 90.00, 90.00[56]      |
| 80 | K <sub>2</sub> Cu <sub>2</sub> GeS <sub>4</sub>   | M, P 1 2 / c 1(13)                                    | 7.1652, 5.3974, 11.2903, 90.00, 113.07, 90.00    | 7.0630, 5.4350, 11.0370, 90.00, 112.83, 90.00[57]    |
| 81 | Li <sub>2</sub> In <sub>2</sub> SiS <sub>6</sub>  | M, C1c1(9)                                            | 12.2913, 7.1458, 12.2786, 90.00, 110.12, 90.00   | 12.0727, 7.0213, 12.0788, 90.00, 110.06, 90.00[58]   |
| 82 | Li <sub>2</sub> In <sub>2</sub> SiSe <sub>6</sub> | M, C1c1(9)                                            | 12.8785, 7.5352, 12.8327, 90.00, 109.86, 90.00   | 12.6210, 7.3788, 12.5800, 90.00, 109.70, 90.00[58]   |
| 83 | Li <sub>2</sub> In <sub>2</sub> GeSe <sub>6</sub> | M, C1c1(9)                                            | 12.4239, 7.2505, 12.3802, 90.00, 110.10, 90.00   | 12.1650, 7.0840, 12.1310, 90.00, 110.26, 90.00[58]   |
| 84 | Li <sub>2</sub> In <sub>2</sub> GeSe <sub>6</sub> | M, C1c1(9)                                            | 12.9920, 7.6221, 12.9263, 90.00, 109.92, 90.00   | 12.7226, 7.4527, 12.6698, 90.00, 109.83, 90.00[58]   |
| 85 | Lu <sub>5</sub> GaS <sub>9</sub>                  | T, P-1(2)                                             | 7.7911, 10.1081, 10.2244, 106.30, 100.29, 101.89 | 7.7350, 10.0330, 10.1200, 106.29, 100.18, 101.95[59] |
| 86 | SrCdGeS <sub>4</sub>                              | O, Ama2(40)                                           | 10.5509, 10.4132, 6.5080, 90.00, 90.00, 90.00    | 10.3352, 10.2335, 6.4408, 90.00, 90.00, 90.00[60]    |
| 87 | SrCdGeSe <sub>4</sub>                             | O, Ama2(40)                                           | 11.0751, 10.9174, 6.7548, 90.00, 90.00, 90.00    | 10.8245, 10.6912, 6.6792, 90.00, 90.00, 90.00[60]    |
| 88 | TlInGe <sub>2</sub> S <sub>6</sub>                | Tr, P3(143)                                           | 10.1605, 10.1605, 9.2651, 90.00, 90.00, 120.00   | 9.7710, 9.7710, 8.9195, 90.00, 90.00, 120.00[61]     |
| 89 | TlInGe <sub>2</sub> Se <sub>6</sub>               | Tr, P3(143)                                           | 10.6304, 10.6304, 9.6646, 90.00, 90.00, 120.00   | 10.1798, 10.1798, 9.2872, 90.00, 90.00, 120.00[62]   |
| 90 | TlGaSn <sub>2</sub> Se <sub>6</sub>               | Tr, R 3(146)                                          | 10.6768, 10.6768, 9.7721, 90.00, 90.00, 119.99   | 10.3289, 10.3289, 9.4340, 90.00, 90.00, 120.00[63]   |
| 91 | Tl <sub>2</sub> PbZrS <sub>4</sub>                | M, C12/c1(15)                                         | 15.5773, 8.2886, 6.8722, 90.00, 108.79, 90.00    | 15.4550, 8.2140, 6.7510, 90.00, 109.09, 90.00[64]    |
| 92 | Tl <sub>2</sub> PbZrSe <sub>4</sub>               | M, C12/c1(15)                                         | 16.0778, 8.5776, 7.1514, 90.00, 108.75, 90.00    | 15.9060, 8.4720, 7.0160, 90.00, 109.01, 90.00[64]    |
| 93 | Tl <sub>2</sub> PbHfS <sub>4</sub>                | M, C12/c1(15)                                         | 15.6171, 8.2820, 6.8136, 90.00, 108.90, 90.00    | 15.4700, 8.2260, 6.7103, 90.00, 109.26, 90.00[64]    |
| 94 | Tl <sub>2</sub> PbHfSe <sub>4</sub>               | M, C12/c1(15)                                         | 16.1215, 8.5728, 7.0959, 90.00, 108.89, 90.00    | 15.9480, 8.4720, 6.9733, 90.00, 109.12, 90.00[64]    |
| 95 | Tl <sub>2</sub> CdGeSe <sub>4</sub>               | Tet, I -4 2 m(121)                                    | 8.1791, 8.1791, 6.8532, 90.00, 90.00, 90.00      | 8.0145, 8.0145, 6.7234, 90.00, 90.00, 90.00[65]      |
| 96 | Tl <sub>2</sub> CdSnSe <sub>4</sub>               | Tet, I -4 2 m(121)                                    | 8.2291, 8.2291, 6.9925, 90.00, 90.00, 90.00      | 8.0490, 8.0490, 6.8573, 90.00, 90.00, 90.00[65]      |
| 97 | Tl <sub>2</sub> HgGeSe <sub>4</sub>               | Tet, I -4 2 m(121)                                    | 8.1699, 8.1699, 6.9259, 90.00, 90.00, 90.00      | 7.9947, 7.9947, 6.7617, 90.00, 90.00, 90.00[66]      |
| 98 | Tl <sub>2</sub> HgSiSe <sub>4</sub>               | Tet, I -4 2 m(121)                                    | 8.1599, 8.1599, 6.8546, 90.00, 90.00, 90.00      | 8.0032, 8.0032, 6.6879, 90.00, 90.00, 90.00[67]      |
| 99 | Tl <sub>2</sub> HgSnS <sub>4</sub>                | Tet, I -4 2 m(121)                                    | 7.9589, 7.9589, 6.8578, 90.00, 90.00, 90.00      | 7.8571, 7.8571, 6.6989, 90.00, 90.00, 90.00[68]      |



**Table S2** The results for the energy gap ( $E_g$ ). The third column is our results, while the fourth column is the other's results. (T) is for calculations and (E) for experimental results. (D) Stands for direct band gap, while (ID) stands for indirect band gap. The reference 74 represents the result from “materials project” website: <https://materialsproject.org/>

| #  | Crystal                                 | $E_g$ (eV), our calculations | $E_g$ (eV), other experimental and calculated data |
|----|-----------------------------------------|------------------------------|----------------------------------------------------|
| 1  | Cu <sub>2</sub> ZnSiS <sub>4</sub>      | 1.380(D)                     | 1.370(D-T)[69]                                     |
| 2  | Cu <sub>2</sub> ZnSiSe <sub>4</sub>     | 0.653(D)                     | 0.560(D-T)[69]                                     |
| 3  | Cu <sub>2</sub> ZnSiTe <sub>4</sub>     | 0.483(ID)                    | 0.150(T)[70]                                       |
| 4  | Cu <sub>2</sub> ZnGeS <sub>4</sub>      | 0.518(D)                     | 0.500(T)[71]                                       |
| 5  | Cu <sub>2</sub> ZnGeSe <sub>4</sub>     | 0.125(D)                     | 0.060(T)[72], 0.640(T)[73]                         |
| 6  | Cu <sub>2</sub> ZnSnS <sub>4</sub>      | 0.390(D)                     | 0.030(T)[74]                                       |
| 7  | Cu <sub>2</sub> ZnSnSe <sub>4</sub>     | 0.136(D)                     | 0.820(T)[75]                                       |
| 8  | Cu <sub>2</sub> ZnSnTe <sub>4</sub>     | 0.324(ID)                    | 0.960(T)[12]                                       |
| 9  | Cu <sub>2</sub> CdSiS <sub>4</sub>      | 1.233(D)                     | 0.980(T)[76]                                       |
| 10 | <b>Cu<sub>2</sub>CdSiSe<sub>4</sub></b> | 0.710(D)                     | —*                                                 |
| 11 | Cu <sub>2</sub> CdGeS <sub>4</sub>      | 0.541(D)                     | 0.640[77]                                          |
| 12 | Cu <sub>2</sub> CdGeSe <sub>4</sub>     | 0.120(D)                     | 0.020(T)[16]                                       |
| 13 | Cu <sub>2</sub> CdGeTe <sub>4</sub>     | 0.163(ID)                    | 0.000(T)[76]                                       |
| 14 | Cu <sub>2</sub> CdSnS <sub>4</sub>      | 0.300(D)                     | 0.000(T)[78]                                       |
| 15 | Cu <sub>2</sub> CdSnSe <sub>4</sub>     | 0.120(D)                     | 0.800(T)[79]                                       |
| 16 | <b>Cu<sub>2</sub>CdSnTe<sub>4</sub></b> | 0.267(ID)                    | —*                                                 |
| 17 | Cu <sub>2</sub> HgGeS <sub>4</sub>      | 0.400(D)                     | 0.307(T)[19]                                       |
| 18 | Cu <sub>2</sub> HgGeSe <sub>4</sub>     | 0.005(D)                     | 0.006(T)[20]                                       |
| 19 | Cu <sub>2</sub> HgGeTe <sub>4</sub>     | 0.151(ID)                    | 0.380(T)[80]                                       |
| 20 | Cu <sub>2</sub> HgSnS <sub>4</sub>      | 0.103(D)                     | 0.191(T)[22]                                       |
| 21 | Cu <sub>2</sub> HgSnSe <sub>4</sub>     | 0.000                        | 0.127(T)[23], 0.0(T)[81]                           |
| 22 | Cu <sub>2</sub> HgSnTe <sub>4</sub>     | 0.432(D)                     | 0.390(T)[80]                                       |
| 23 | Cu <sub>2</sub> BaGeS <sub>4</sub>      | 0.778(D)                     | 1.800(D-T)[82]                                     |
| 24 | Cu <sub>2</sub> BaGeSe <sub>4</sub>     | 0.654(D)                     | 1.000(D-T)[82]                                     |
| 25 | <b>Cu<sub>2</sub>SrSiS<sub>4</sub></b>  | <b>2.200(D)</b>              | <b>3.30(ID-E)[27], 3.04(E)[83], 2.32(T)[83]</b>    |
| 26 | Cu <sub>2</sub> SrGeS <sub>4</sub>      | 1.184(D)                     | 1.050(T)[76]                                       |
| 27 | Cu <sub>2</sub> SrGeSe <sub>4</sub>     | 0.880(ID)                    | 0.592(T)[76]                                       |
| 28 | Cu <sub>2</sub> BaSnS <sub>4</sub>      | 0.632(D)                     | 1.460(T)[25]                                       |
| 29 | Cu <sub>2</sub> BaSnSe <sub>4</sub>     | 0.930(D)                     | 1.500(D-T)[25]                                     |
| 30 | <b>Cu<sub>2</sub>SrSnS<sub>4</sub></b>  | <b>1.03(D)</b>               | <b>0.46(T)[28], 0.38(T)[84], 1.62(T)[84]</b>       |
| 31 | Cu <sub>2</sub> SrSnSe <sub>4</sub>     | 0.785(D)                     | 1.460(D-E)[25]                                     |
| 32 | Cu <sub>2</sub> MgSiS <sub>4</sub>      | 1.689(D)                     | 2.010(T)[30]                                       |
| 33 | Cu <sub>2</sub> MgSiSe <sub>4</sub>     | 1.047(D)                     | 1.017(T)[30]                                       |
| 34 | Cu <sub>2</sub> MgGeS <sub>4</sub>      | 0.855(D)                     | 1.249(T)[30]                                       |
| 35 | Cu <sub>2</sub> MgSnS <sub>4</sub>      | 0.626(D)                     | 0.781(T)[31], 0.35(T)[85]                          |
| 36 | Cu <sub>2</sub> MgSnSe <sub>4</sub>     | 0.381(D)                     | 0.000-0.580(T)[85]                                 |
| 37 | <b>Cu<sub>2</sub>MgSnTe<sub>4</sub></b> | 0.389(ID)                    | —*                                                 |
| 38 | Ag <sub>2</sub> ZnSiS <sub>4</sub>      | 0.463(D)                     | 1.800(D-T)[33]                                     |
| 39 | Ag <sub>2</sub> ZnSnS <sub>4</sub>      | 0.750(D)                     | 1.150(D-T)[86]                                     |
| 40 | Ag <sub>2</sub> ZnSnSe <sub>4</sub>     | 0.500(D)                     | 0.940(D-T)[87]                                     |
| 41 | Ag <sub>2</sub> CdGeS <sub>4</sub>      | 0.998(D)                     | 1.060(T)[88]                                       |
| 42 | Ag <sub>2</sub> CdSnS <sub>4</sub>      | 0.801(D)                     | 0.974(T)[36]                                       |
| 43 | Ag <sub>2</sub> CdSnSe <sub>4</sub>     | 0.600(D)                     | 0.577(T)[37]                                       |
| 44 | Ag <sub>2</sub> CdSnTe <sub>4</sub>     | 0.680(D)                     | 0.586(T)[37]                                       |
| 45 | Ag <sub>2</sub> HgSnS <sub>4</sub>      | 0.528(D)                     | 0.170(T)[89]                                       |
| 46 | Ag <sub>2</sub> HgSnSe <sub>4</sub>     | 0.310(D)                     | 0.484(T)[39], 0.23(T)[89]                          |
| 47 | Ag <sub>2</sub> BaGeS <sub>4</sub>      | 1.100(D)                     | 1.380(T)[25]                                       |
| 48 | Ag <sub>2</sub> BaGeSe <sub>4</sub>     | 0.700(D)                     | 0.850(T)[25]                                       |
| 49 | Ag <sub>2</sub> BaSnS <sub>4</sub>      | 1.010(D)                     | 1.260(T)[25]                                       |
| 50 | Ag <sub>2</sub> BaSnSe <sub>4</sub>     | 0.810(D)                     | 0.770(T)[25]                                       |

|    |                                                    |           |                                 |
|----|----------------------------------------------------|-----------|---------------------------------|
| 51 | Ag <sub>2</sub> SrGeS <sub>4</sub>                 | 0.630(D)  | 1.330(T)[25]                    |
| 52 | Ag <sub>2</sub> SrGeSe <sub>4</sub>                | 0.310(D)  | 0.680(T)[25]                    |
| 53 | Ag <sub>2</sub> SrSnS <sub>4</sub>                 | 0.550(D)  | 1.080(T)[25]                    |
| 54 | Ag <sub>2</sub> SrSnSe <sub>4</sub>                | 0.410(D)  | 0.660(T)[25]                    |
| 55 | Ag <sub>2</sub> In <sub>2</sub> SiS <sub>6</sub>   | 1.404(D)  | 1.570(T)[40]                    |
| 56 | Ag <sub>2</sub> In <sub>2</sub> GeS <sub>6</sub>   | 1.333(D)  | 1.880(T)[40]                    |
| 57 | Ag <sub>2</sub> In <sub>2</sub> SiSe <sub>6</sub>  | 1.403(D)  | 0.472(T)[76]                    |
| 58 | Ag <sub>2</sub> In <sub>2</sub> GeSe <sub>6</sub>  | 1.040(D)  | 0.432 (T)[76]                   |
| 59 | Ag <sub>2</sub> SiS <sub>3</sub>                   | 1.600(ID) | 1.420(T)[42]                    |
| 60 | Ag <sub>2</sub> GeS <sub>3</sub>                   | 0.663(ID) | 0.469(T)[76]                    |
| 61 | Cu <sub>2</sub> GeS <sub>3</sub>                   | 0.025(ID) | 0.110(T)[76]                    |
| 62 | Cu <sub>2</sub> GeSe <sub>3</sub>                  | 0.000     | 0.000(T)[90]                    |
| 63 | Ag <sub>2</sub> SnSe <sub>3</sub>                  | 0.906(ID) | 0.059(T)[76]                    |
| 64 | <b>Ag<sub>2</sub>SnTe<sub>3</sub></b>              | 0.390(D)  | —*                              |
| 65 | Ag <sub>4</sub> P <sub>2</sub> S <sub>6</sub>      | 1.620(D)  | 1.437(T)[76]                    |
| 66 | <b>Ag<sub>4</sub>P<sub>2</sub>Se<sub>6</sub></b>   | 1.200(D)  | —*                              |
| 67 | BaZnSiSe <sub>4</sub>                              | 2.494(D)  | 2.710(T)[50]                    |
| 68 | BaZnGeSe <sub>4</sub>                              | 1.708(D)  | 2.460(T)[50]                    |
| 69 | <b>BaHg<sub>2</sub>As<sub>2</sub>S<sub>6</sub></b> | 1.541(D)  | —*                              |
| 70 | BaCd <sub>2</sub> As <sub>2</sub> S <sub>6</sub>   | 1.377(D)  | 1.770(D-T)                      |
| 71 | Ba <sub>2</sub> AlSbS <sub>5</sub>                 | 2.069(D)  | 2.400(ID-T)[52]                 |
| 72 | Ba <sub>2</sub> GaBiSe <sub>5</sub>                | 1.475(D)  | 1.890(ID-T)[52]                 |
| 73 | Ba <sub>2</sub> AsGaSe <sub>5</sub>                | 2.031(D)  | 1.862(T)[76]                    |
| 74 | <b>Ba<sub>2</sub>LaGaSe<sub>5</sub></b>            | 1.799(ID) | —*                              |
| 75 | <b>Ba<sub>2</sub>LuGaSe<sub>5</sub></b>            | 1.375(ID) | —*                              |
| 76 | <b>Ba<sub>2</sub>LuInSe<sub>5</sub></b>            | 1.244(D)  | —*                              |
| 77 | Ba <sub>4</sub> AgInS <sub>6</sub>                 | 1.956(D)  | 1.686(T)[76]                    |
| 78 | CsCu <sub>5</sub> S <sub>3</sub>                   | 0.390(D)  | 0.325(T)[76]                    |
| 79 | CsCu <sub>5</sub> Se <sub>3</sub>                  | 0.235(D)  | 1.010(T)[56]                    |
| 80 | K <sub>2</sub> Cu <sub>2</sub> GeS <sub>4</sub>    | 1.150(ID) | 1.457[91]                       |
| 81 | Li <sub>2</sub> In <sub>2</sub> SiS <sub>6</sub>   | 2.062(D)  | 3.240[58], 2.116(T)[76]         |
| 82 | Li <sub>2</sub> In <sub>2</sub> SiSe <sub>6</sub>  | 1.600(D)  | 2.350[58], 1.497(T)[76]         |
| 83 | Li <sub>2</sub> In <sub>2</sub> GeS <sub>6</sub>   | 1.949(D)  | 2.990[58], 2.033 (T)[76]        |
| 84 | Li <sub>2</sub> In <sub>2</sub> GeSe <sub>6</sub>  | 1.146(D)  | 1.920[58], 1.199 (T)[76]        |
| 85 | Lu <sub>5</sub> GaS <sub>9</sub>                   | 1.759(D)  | 1.890(ID-T)[59]                 |
| 86 | SrCdGeS <sub>4</sub>                               | 2.423(D)  | 2.600(E)[60]                    |
| 87 | SrCdGeSe <sub>4</sub>                              | 1.777(D)  | 1.900(E)[60]                    |
| 88 | TlInGe <sub>2</sub> S <sub>6</sub>                 | 1.526(D)  | 2.001(T)[61]                    |
| 89 | TlInGe <sub>2</sub> Se <sub>6</sub>                | 1.130(D)  | 1.299(T)[62]                    |
| 90 | TlGaSn <sub>2</sub> Se <sub>6</sub>                | 1.100(D)  | 1.143(T)[63]                    |
| 91 | Tl <sub>2</sub> PbZrS <sub>4</sub>                 | 0.590(D)  | 0.983(ID-T)[92], 1.240(T)[76]   |
| 92 | Tl <sub>2</sub> PbZrSe <sub>4</sub>                | 0.470(D)  | 0.529(ID-T)[92], 1.0190 (T)[76] |
| 93 | Tl <sub>2</sub> PbHfS <sub>4</sub>                 | 0.580(D)  | 0.911(ID-T)[92]                 |
| 94 | Tl <sub>2</sub> PbHfSe <sub>4</sub>                | 0.690(D)  | 0.659(ID-T)[92], 0.962 (T)[76]  |
| 95 | <b>Tl<sub>2</sub>CdGeSe<sub>4</sub></b>            | 0.000     | —*                              |
| 96 | <b>Tl<sub>2</sub>CdSnSe<sub>4</sub></b>            | 0.000     | —*                              |
| 97 | <b>Tl<sub>2</sub>HgGeSe<sub>4</sub></b>            | 0.000     | —*                              |
| 98 | Tl <sub>2</sub> HgSiSe <sub>4</sub>                | 0.000     | 0.959(T)[76]                    |
| 99 | <b>Tl<sub>2</sub>HgSnS<sub>4</sub></b>             | 0.000     | —*                              |

**Table S3** Our results for the 99 crystals: the average effective charge on each atoms ( $Q^*$ ), total bond order density (TBOD), and the plasma frequency ( $\omega_p$ ). All numbers here are with three decimal point, except for TBOD, which have four significant figures.

| #  | Crystal                             | $Q^*$ (in $e^-$ )                                | TBOD ( $e^-/\text{\AA}^3$ ) | $\omega_p$ (eV) |
|----|-------------------------------------|--------------------------------------------------|-----------------------------|-----------------|
| 1  | Cu <sub>2</sub> ZnSiS <sub>4</sub>  | 11.017(Cu), 11.611(Zn), 3.098(Si), 6.314(S)      | 0.0248                      | 19.500          |
| 2  | Cu <sub>2</sub> ZnSiSe <sub>4</sub> | 11.039 (Cu), 11.703 (Zn), 3.368 (Si), 6.212 (Se) | 0.0205                      | 18.100          |
| 3  | Cu <sub>2</sub> ZnSiTe <sub>4</sub> | 11.262 (Cu), 11.932 (Zn), 3.788 (Si), 5.938 (Te) | 0.0180                      | 17.250          |
| 4  | Cu <sub>2</sub> ZnGeS <sub>4</sub>  | 10.992 (Cu), 11.605 (Zn), 3.372 (Ge), 6.259 (S)  | 0.0228                      | 19.100          |
| 5  | Cu <sub>2</sub> ZnGeSe <sub>4</sub> | 11.023 (Cu), 11.702 (Zn), 3.573 (Ge), 6.169 (Se) | 0.0189                      | 18.100          |
| 6  | Cu <sub>2</sub> ZnSnS <sub>4</sub>  | 11.029 (Cu), 11.631 (Zn), 3.030 (Sn), 6.319 (S)  | 0.0211                      | 18.900          |
| 7  | Cu <sub>2</sub> ZnSnSe <sub>4</sub> | 11.046 (Cu), 11.714 (Zn), 3.239 (Sn), 6.238 (Se) | 0.0180                      | 18.100          |
| 8  | Cu <sub>2</sub> ZnSnTe <sub>4</sub> | 11.258 (Cu), 11.954 (Zn), 3.555(Sn), 5.993 (Te)  | 0.0163                      | 16.800          |
| 9  | Cu <sub>2</sub> CdSiS <sub>4</sub>  | 11.078 (Cu), 11.138 (Cd), 3.092 (Si), 6.403 (S)  | 0.0213                      | 19.800          |
| 10 | Cu <sub>2</sub> CdSiSe <sub>4</sub> | 11.077 (Cu), 11.194 (Cd), 3.368 (Si), 6.320 (Se) | 0.0177                      | 18.100          |
| 11 | Cu <sub>2</sub> CdGeS <sub>4</sub>  | 11.046(Cu), 11.145 (Cd), 3.371 (Ge), 6.348 (S)   | 0.0195                      | 19.600          |
| 12 | Cu <sub>2</sub> CdGeSe <sub>4</sub> | 11.061(Cu), 11.188 (Cd), 3.572(Ge), 6.279 (Se)   | 0.0164                      | 19.100          |
| 13 | Cu <sub>2</sub> CdGeTe <sub>4</sub> | 11.264 (Cu), 11.289 (Cd), 3.925 (Ge), 6.064(Te)  | 0.0147                      | 17.100          |
| 14 | Cu <sub>2</sub> CdSnS <sub>4</sub>  | 11.065 (Cu), 11.161 (Cd), 3.070 (Sn), 6.409 (S)  | 0.0181                      | 19.100          |
| 15 | Cu <sub>2</sub> CdSnSe <sub>4</sub> | 11.066 (Cu), 11.201 (Cd), 3.268 (Sn), 6.349 (Se) | 0.0155                      | 17.400          |
| 16 | Cu <sub>2</sub> CdSnTe <sub>4</sub> | 11.263 (Cu), 11.296 (Cd), 3.573 (Sn), 6.151(Te)  | 0.0141                      | 16.300          |
| 17 | Cu <sub>2</sub> HgGeS <sub>4</sub>  | 11.027 (Cu), 11.456(Hg), 3.316 (Ge), 6.293 (S)   | 0.0132                      | 20.100          |
| 18 | Cu <sub>2</sub> HgGeSe <sub>4</sub> | 11.049(Cu), 11.551(Hg), 3.522(Ge), 6.207 (Se)    | 0.0112                      | 19.400          |
| 19 | Cu <sub>2</sub> HgGeTe <sub>4</sub> | 11.316 (Cu), 11.816 (Hg), 3.883(Ge), 5.917 (Te)  | 0.0103                      | 17.100          |
| 20 | Cu <sub>2</sub> HgSnS <sub>4</sub>  | 11.045(Cu), 11.496(Hg), 3.056 (Sn), 6.339 (S)    | 0.0126                      | 19.100          |
| 21 | Cu <sub>2</sub> HgSnSe <sub>4</sub> | 11.059 (Cu), 11.578 (Hg), 3.264 (Sn), 6.259 (Se) | 0.0109                      | 18.500          |
| 22 | Cu <sub>2</sub> HgSnTe <sub>4</sub> | 11.314 (Cu), 11.826 (Hg), 3.622 (Sn), 5.980 (Te) | 0.0102                      | 16.500          |
| 23 | Cu <sub>2</sub> BaGeS <sub>4</sub>  | 11.200 (Cu), 8.103 (Ba), 3.367(Ge), 6.532 (S)    | 0.0133                      | 21.200          |
| 24 | Cu <sub>2</sub> BaGeSe <sub>4</sub> | 11.199(Cu), 8.117(Ba), 3.544(Ge), 6.485 (Se)     | 0.0123                      | 20.500          |
| 25 | Cu <sub>2</sub> SrSiS <sub>4</sub>  | 11.168(Cu), 6.811(Sr), 3.084(Si), 6.442(S)       | 0.0193                      | 24.000          |
| 26 | Cu <sub>2</sub> SrGeS <sub>4</sub>  | 11.141 (Cu), 6.854 (Sr), 3.361 (Ge), 6.375 (S)   | 0.0177                      | 23.900          |
| 27 | Cu <sub>2</sub> SrGeSe <sub>4</sub> | 11.138 (Cu), 6.891 (Sr), 3.541 (Ge), 6.322 (Se)  | 0.0145                      | 23.500          |
| 28 | Cu <sub>2</sub> BaSnS <sub>4</sub>  | 11.149 (Cu), 8.109(Ba), 3.136 (Sn), 6.614 (S)    | 0.0110                      | 19.900          |
| 29 | Cu <sub>2</sub> BaSnSe <sub>4</sub> | 11.184 (Cu), 8.125 (Ba), 3.200 (Sn), 6.576 (Se)  | 0.0111                      | 20.100          |
| 30 | Cu <sub>2</sub> SrSnS <sub>4</sub>  | 11.176(Cu), 6.776(Sr), 3.041(Sn), 6.457(S)       | 0.0159                      | 23.100          |
| 31 | Cu <sub>2</sub> SrSnSe <sub>4</sub> | 11.147 (Cu), 6.890 (Sr), 3.225 (Sn), 6.397 (Se)  | 0.0145                      | 23.500          |
| 32 | Cu <sub>2</sub> MgSiS <sub>4</sub>  | 11.069 (Cu), 6.973(Mg), 3.095 (Si), 6.448 (S)    | 0.0224                      | 19.400          |
| 33 | Cu <sub>2</sub> MgSiSe <sub>4</sub> | 11.079 (Cu), 7.065(Mg), 3.363 (Si), 6.353 (Se)   | 0.0186                      | 18.200          |
| 34 | Cu <sub>2</sub> MgGeS <sub>4</sub>  | 11.054 (Cu), 6.983(Mg), 3.369 (Ge), 6.385(S)     | 0.0206                      | 19.400          |
| 35 | Cu <sub>2</sub> MgSnS <sub>4</sub>  | 11.076(Cu), 7.019 (Mg), 3.053 (Sn), 6.444(S)     | 0.0191                      | 18.100          |
| 36 | Cu <sub>2</sub> MgSnSe <sub>4</sub> | 11.071 (Cu), 7.077 (Mg), 3.256 (Sn), 6.381 (Se)  | 0.0162                      | 16.900          |
| 37 | Cu <sub>2</sub> MgSnTe <sub>4</sub> | 11.260 (Cu), 7.156 (Mg), 3.569 (Sn), 6.188 (Te)  | 0.0143                      | 16.100          |
| 38 | Ag <sub>2</sub> ZnSiS <sub>4</sub>  | 10.822 (Ag), 11.506(Zn), 3.133 (Si), 6.429 (S)   | 0.0145                      | 17.200          |
| 39 | Ag <sub>2</sub> ZnSnS <sub>4</sub>  | 10.939 (Ag), 11.604(Zn), 2.980 (Sn), 6.384 (S)   | 0.0167                      | 18.200          |
| 40 | Ag <sub>2</sub> ZnSnSe <sub>4</sub> | 10.954 (Ag), 11.684(Zn), 3.192 (Sn), 6.303 (Se)  | 0.0145                      | 18.100          |
| 41 | Ag <sub>2</sub> CdGeS <sub>4</sub>  | 10.953 (Ag), 11.138 (Cd), 3.314 (Ge), 6.410 (S)  | 0.0153                      | 18.400          |
| 42 | Ag <sub>2</sub> CdSnS <sub>4</sub>  | 11.065 (Ag), 11.161 (Cd), 3.070 (Sn), 6.409 (S)  | 0.0144                      | 18.900          |
| 43 | Ag <sub>2</sub> CdSnSe <sub>4</sub> | 10.973(Ag), 11.178 (Cd), 3.206(Sn), 6.417 (Se)   | 0.0125                      | 17.500          |
| 44 | Ag <sub>2</sub> CdSnTe <sub>4</sub> | 11.100 (Ag), 11.278 (Cd), 3.533 (Sn), 6.247(Te)  | 0.0115                      | 16.800          |
| 45 | Ag <sub>2</sub> HgSnS <sub>4</sub>  | 10.950 (Ag), 11.470 (Hg), 2.98 (Sn), 6.412(S)    | 0.0101                      | 18.600          |
| 46 | Ag <sub>2</sub> HgSnSe <sub>4</sub> | 10.965 (Ag), 11.546 (Hg), 3.198 (Sn), 6.331 (Se) | 0.0088                      | 16.500          |
| 47 | Ag <sub>2</sub> BaGeS <sub>4</sub>  | 11.071 (Ag), 8.138 (Ba), 3.308 (Ge), 6.603(S)    | 0.0120                      | 20.900          |
| 48 | Ag <sub>2</sub> BaGeSe <sub>4</sub> | 11.027 (Ag), 8.155(Ba), 3.494 (Ge), 6.574(Se)    | 0.0100                      | 20.100          |
| 49 | Ag <sub>2</sub> BaSnS <sub>4</sub>  | 11.035(Ag), 8.145 (Ba), 2.998 (Sn), 6.696 (S)    | 0.0106                      | 20.500          |
| 50 | Ag <sub>2</sub> BaSnSe <sub>4</sub> | 11.018 (Ag), 8.157 (Ba), 3.169 (Sn), 6.659 (Se)  | 0.0100                      | 19.900          |
| 51 | Ag <sub>2</sub> SrGeS <sub>4</sub>  | 11.018 (Ag), 6.868(Sr), 3.318 (Ge), 6.444 (S)    | 0.0144                      | 23.500          |
| 52 | Ag <sub>2</sub> SrGeSe <sub>4</sub> | 11.022 (Ag), 6.872(Sr), 3.515 (Ge), 6.392 (Se)   | 0.0123                      | 23.300          |
| 53 | Ag <sub>2</sub> SrSnS <sub>4</sub>  | 11.015 (Ag), 6.861 (Sr), 3.007 (Sn), 6.525 (S)   | 0.0133                      | 23.250          |

|    |                                                   |                                                  |        |        |
|----|---------------------------------------------------|--------------------------------------------------|--------|--------|
| 54 | Ag <sub>2</sub> SrSnSe <sub>4</sub>               | 11.014(Ag), 6.866(Sr), 3.196 (Sn), 6.477 (Se)    | 0.0110 | 23.700 |
| 55 | Ag <sub>2</sub> In <sub>2</sub> SiS <sub>6</sub>  | 10.921 (Ag), 12.171 (In), 3.141(Si), 6.446(S)    | 0.0159 | 17.400 |
| 56 | Ag <sub>2</sub> In <sub>2</sub> GeS <sub>6</sub>  | 10.911 (Ag), 12.172 (In), 3.377(Ge), 6.409 (S)   | 0.0149 | 17.500 |
| 57 | Ag <sub>2</sub> In <sub>2</sub> SiSe <sub>6</sub> | 10.951 (Ag), 12.317(In), 3.393(Si), 6.345 (Se)   | 0.0137 | 17.100 |
| 58 | Ag <sub>2</sub> In <sub>2</sub> GeSe <sub>6</sub> | 10.940 (Ag), 12.314 (In), 3.588 (Ge), 6.317 (Se) | 0.0130 | 16.900 |
| 59 | Ag <sub>2</sub> SiS <sub>3</sub>                  | 10.889(Ag), 3.042 (Si), 6.393 (S)                | 0.0168 | 19.500 |
| 60 | Ag <sub>2</sub> GeS <sub>3</sub>                  | 10.901 (Ag), 3.310 (Ge), 6.295 (S)               | 0.0159 | 18.600 |
| 61 | Cu <sub>2</sub> GeS <sub>3</sub>                  | 10.981 (Cu), 3.388 (Ge), 6.216 (S)               | 0.0222 | 19.500 |
| 62 | Cu <sub>2</sub> GeSe <sub>3</sub>                 | 11.017 (Cu), 3.591(Ge), 6.125(Se)                | 0.0183 | 19.100 |
| 63 | Ag <sub>2</sub> SnSe <sub>3</sub>                 | 10.921 (Ag), 3.496(Sn), 6.221(Se)                | 0.0062 | 15.500 |
| 64 | Ag <sub>2</sub> SnTe <sub>3</sub>                 | 11.089 (Ag), 3.529 (Sn), 6.097 (Te)              | 0.0119 | 15.900 |
| 65 | Ag <sub>4</sub> P <sub>2</sub> S <sub>6</sub>     | 10.888 (Ag), 4.338(P), S = 6.294 (S)             | 0.0155 | 18.900 |
| 66 | Ag <sub>4</sub> P <sub>2</sub> Se <sub>6</sub>    | 10.939 (Ag), 4.577(P), 6.182(Se)                 | 0.0134 | 18.700 |
| 67 | BaZnSiSe <sub>4</sub>                             | 8.160(Ba), 11.665 (Zn), 3.343(Si), 6.708(Se)     | 0.0096 | 20.500 |
| 68 | BaZnGeSe <sub>4</sub>                             | 8.158 (Ba), 11.655 (Zn), 3.521 (Ge), 6.666 (Se)  | 0.0088 | 20.200 |
| 69 | BaHg <sub>2</sub> As <sub>2</sub> S <sub>6</sub>  | 8.815(Ba), 11.514 (Hg), 4.540 (As), 6.512 (S)    | 0.0064 | 20.100 |
| 70 | BaCd <sub>2</sub> As <sub>2</sub> S <sub>6</sub>  | 8.181(Ba), 11.164 (Cd), 4.559 (As), 6.729(S)     | 0.0077 | 20.500 |
| 71 | Ba <sub>2</sub> AlSbS <sub>5</sub>                | 8.171 (Ba), 2.242 (Al), 4.246 (Sb), 7.033 (S)    | 0.0063 | 21.300 |
| 72 | Ba <sub>2</sub> GaBiSe <sub>5</sub>               | 8.165 (Ba), 12.733 (Ga), 14.341(Bi), 6.919 (Se)  | 0.0053 | 20.600 |
| 73 | Ba <sub>2</sub> AsGaSe <sub>5</sub>               | 8.171 (Ba), 4.644(As), 12.675 (Ga), 6.867 (Se)   | 0.0054 | 20.900 |
| 74 | Ba <sub>2</sub> LaGaSe <sub>5</sub>               | 8.165 (Ba), 9.897(La), 12.683 (Ga), 7.018(Se)    | 0.0065 | 22.900 |
| 75 | Ba <sub>2</sub> LuGaSe <sub>5</sub>               | 8.951 (Ba), 15.864(Lu), 12.737(Ga), 6.699 (Se)   | 0.0061 | 20.500 |
| 76 | Ba <sub>2</sub> LuInSe <sub>5</sub>               | 8.989 (Ba), 15.902(Lu), 12.428 (In), 6.738 (Se)  | 0.0118 | 20.450 |
| 77 | Ba <sub>4</sub> AgInS <sub>6</sub>                | 8.174 (Ba), 11.365 (Ag), 12.405 (In), 7.255 (S)  | 0.0050 | 22.600 |
| 78 | CsCu <sub>5</sub> S <sub>3</sub>                  | 8.212 (Cs), 11.012 (Cu), 6.242 (S)               | 0.0181 | 20.700 |
| 79 | CsCu <sub>5</sub> Se <sub>3</sub>                 | 8.287(Cs), 11.015 (Cu), 6.212(Se)                | 0.0162 | 19.750 |
| 80 | K <sub>2</sub> Cu <sub>2</sub> GeS <sub>4</sub>   | 6.254 (k), 11.091 (Cu), 3.419 (Ge), 6.472 (S)    | 0.0136 | 24.500 |
| 81 | Li <sub>2</sub> In <sub>2</sub> SiS <sub>6</sub>  | 0.669 (Li), 12.198 (In), 3.147 (Si), 6.519 (S)   | 0.0167 | 17.500 |
| 82 | Li <sub>2</sub> In <sub>2</sub> SiSe <sub>6</sub> | 0.677 (Li), 12.336(In), 3.400 (Si), 6.428 (Se)   | 0.0141 | 16.600 |
| 83 | Li <sub>2</sub> In <sub>2</sub> GeS <sub>6</sub>  | 0.658 (Li), 12.197 (In), 3.390 (Ge), 6.483 (S)   | 0.0155 | 17.400 |
| 84 | Li <sub>2</sub> In <sub>2</sub> GeSe <sub>6</sub> | 0.666 (Li), 12.331 (In), 3.604 (Ge), 6.399 (Se)  | 0.0132 | 16.700 |
| 85 | Lu <sub>5</sub> GaS <sub>9</sub>                  | 15.903 (Lu), 12.322(Ga), 6.684 (S)               | 0.0102 | 31.100 |
| 86 | SrCdGeS <sub>4</sub>                              | 6.971 (Sr), 11.148(Cd), 3.354 (Ge), 6.631 (S)    | 0.0121 | 23.900 |
| 87 | SrCdGeSe <sub>4</sub>                             | 6.965 (Sr), 11.203(Cd), 3.555 (Ge), 6.569 (Se)   | 0.0105 | 23.500 |
| 88 | TlInGe <sub>2</sub> S <sub>6</sub>                | 12.619 (Tl), 12.171(In), 3.326 (Ge), 6.426 (S)   | 0.0114 | 18.450 |
| 89 | TlInGe <sub>2</sub> Se <sub>6</sub>               | 12.649 (Tl), 12.312 (In), 3.552(Ge), 6.322 (Se)  | 0.0095 | 17.900 |
| 90 | TlGaSn <sub>2</sub> Se <sub>6</sub>               | 12.711(Tl), 12.603 (Ga), 3.449 (Sn), 6.298(Se)   | 0.0097 | 17.890 |
| 91 | Tl <sub>2</sub> PbZrS <sub>4</sub>                | 12.714 (Tl), 13.371 (Pb), 8.941 (Zr), 6.565(S)   | 0.0075 | 18.200 |
| 92 | Tl <sub>2</sub> PbZrSe <sub>4</sub>               | 12.724(Tl), 13.427 (Pb), 9.027 (Zr), 6.524 (Se)  | 0.0073 | 19.500 |
| 93 | Tl <sub>2</sub> PbHfS <sub>4</sub>                | 12.679 (Tl), 13.337 (Pb), 3.296 (Hf), 6.502 (S)  | 0.0075 | 18.900 |
| 94 | Tl <sub>2</sub> PbHfSe <sub>4</sub>               | 12.681 (Tl), 13.387 (Pb), 3.388(Hf), 6.466(Se)   | 0.0073 | 19.400 |
| 95 | Tl <sub>2</sub> CdGeSe <sub>4</sub>               | 12.743 (Tl), 11.166 (Cd), 3.545(Ge), 6.450 (Se)  | 0.0085 | 18.600 |
| 96 | Tl <sub>2</sub> CdSnSe <sub>4</sub>               | 12.751 (Tl), 11.173(Cd), 3.236 (Sn), 6.529 (Se)  | 0.0080 | 18.900 |
| 97 | Tl <sub>2</sub> HgGeSe <sub>4</sub>               | 12.649 (Tl), 11.535 (Hg), 3.485 (Ge), 6.420 (Se) | 0.0062 | 18.700 |
| 98 | Tl <sub>2</sub> HgSiSe <sub>4</sub>               | 12.660 (Tl), 11.544 (Hg), 3.344 (Si), 6.447 (Se) | 0.0067 | 18.450 |
| 99 | Tl <sub>2</sub> HgSnS <sub>4</sub>                | 12.632 (Tl), 11.498 (Hg), 2.993 (Sn), 6.561(S)   | 0.0066 | 19.150 |

**Table S4** Our results for the 99 crystals: refractive index (n).

| #  | Crystal                                          | n     |
|----|--------------------------------------------------|-------|
| 1  | Cu <sub>2</sub> ZnSiS <sub>4</sub>               | 2.673 |
| 2  | Cu <sub>2</sub> ZnSiSe <sub>4</sub>              | 2.894 |
| 3  | Cu <sub>2</sub> ZnSiTe <sub>4</sub>              | 3.354 |
| 4  | Cu <sub>2</sub> ZnGeS <sub>4</sub>               | 2.915 |
| 5  | Cu <sub>2</sub> ZnGeSe <sub>4</sub>              | 3.741 |
| 6  | Cu <sub>2</sub> ZnSnS <sub>4</sub>               | 3.240 |
| 7  | Cu <sub>2</sub> ZnSnSe <sub>4</sub>              | 3.741 |
| 8  | Cu <sub>2</sub> ZnSnTe <sub>4</sub>              | 3.605 |
| 9  | Cu <sub>2</sub> CdSiS <sub>4</sub>               | 2.673 |
| 10 | Cu <sub>2</sub> CdSiSe <sub>4</sub>              | 2.932 |
| 11 | Cu <sub>2</sub> CdGeS <sub>4</sub>               | 3.016 |
| 12 | Cu <sub>2</sub> CdGeSe <sub>4</sub>              | 3.807 |
| 13 | Cu <sub>2</sub> CdGeTe <sub>4</sub>              | 3.821 |
| 14 | Cu <sub>2</sub> CdSnS <sub>4</sub>               | 3.391 |
| 15 | Cu <sub>2</sub> CdSnSe <sub>4</sub>              | 3.872 |
| 16 | Cu <sub>2</sub> CdSnTe <sub>4</sub>              | 3.674 |
| 17 | Cu <sub>2</sub> HgGeS <sub>4</sub>               | 3.162 |
| 18 | Cu <sub>2</sub> HgGeSe <sub>4</sub>              | 3.821 |
| 19 | Cu <sub>2</sub> HgGeTe <sub>4</sub>              | 3.847 |
| 20 | Cu <sub>2</sub> HgSnS <sub>4</sub>               | 3.566 |
| 21 | Cu <sub>2</sub> HgSnSe <sub>4</sub>              | 4.183 |
| 22 | Cu <sub>2</sub> HgSnTe <sub>4</sub>              | 3.549 |
| 23 | Cu <sub>2</sub> BaGeS <sub>4</sub>               | 2.915 |
| 24 | Cu <sub>2</sub> BaGeSe <sub>4</sub>              | 3.130 |
| 25 | Cu <sub>2</sub> SrSiS <sub>4</sub>               | 2.608 |
| 26 | Cu <sub>2</sub> SrGeS <sub>4</sub>               | 2.828 |
| 27 | Cu <sub>2</sub> SrGeSe <sub>4</sub>              | 3.049 |
| 28 | Cu <sub>2</sub> BaSnS <sub>4</sub>               | 2.881 |
| 29 | Cu <sub>2</sub> BaSnSe <sub>4</sub>              | 3.025 |
| 30 | Cu <sub>2</sub> SrSnS <sub>4</sub>               | 2.933 |
| 31 | Cu <sub>2</sub> SrSnSe <sub>4</sub>              | 3.098 |
| 32 | Cu <sub>2</sub> MgSiS <sub>4</sub>               | 2.588 |
| 33 | Cu <sub>2</sub> MgSiSe <sub>4</sub>              | 2.756 |
| 34 | Cu <sub>2</sub> MgGeS <sub>4</sub>               | 2.828 |
| 35 | Cu <sub>2</sub> MgSnS <sub>4</sub>               | 3.001 |
| 36 | Cu <sub>2</sub> MgSnSe <sub>4</sub>              | 3.354 |
| 37 | Cu <sub>2</sub> MgSnTe <sub>4</sub>              | 3.464 |
| 38 | Ag <sub>2</sub> ZnSiS <sub>4</sub>               | 2.692 |
| 39 | Ag <sub>2</sub> ZnSnS <sub>4</sub>               | 2.765 |
| 40 | Ag <sub>2</sub> ZnSnSe <sub>4</sub>              | 3.025 |
| 41 | Ag <sub>2</sub> CdGeS <sub>4</sub>               | 2.664 |
| 42 | Ag <sub>2</sub> CdSnS <sub>4</sub>               | 2.756 |
| 43 | Ag <sub>2</sub> CdSnSe <sub>4</sub>              | 2.983 |
| 44 | Ag <sub>2</sub> CdSnTe <sub>4</sub>              | 3.130 |
| 45 | Ag <sub>2</sub> HgSnS <sub>4</sub>               | 2.683 |
| 46 | Ag <sub>2</sub> HgSnSe <sub>4</sub>              | 2.983 |
| 47 | Ag <sub>2</sub> BaGeS <sub>4</sub>               | 2.262 |
| 48 | Ag <sub>2</sub> BaGeSe <sub>4</sub>              | 2.756 |
| 49 | Ag <sub>2</sub> BaSnS <sub>4</sub>               | 2.598 |
| 50 | Ag <sub>2</sub> BaSnSe <sub>4</sub>              | 2.738 |
| 51 | Ag <sub>2</sub> SrGeS <sub>4</sub>               | 2.626 |
| 52 | Ag <sub>2</sub> SrGeSe <sub>4</sub>              | 2.802 |
| 53 | Ag <sub>2</sub> SrSnS <sub>4</sub>               | 2.645 |
| 54 | Ag <sub>2</sub> SrSnSe <sub>4</sub>              | 2.766 |
| 55 | Ag <sub>2</sub> In <sub>2</sub> SiS <sub>6</sub> | 2.499 |
| 56 | Ag <sub>2</sub> In <sub>2</sub> GeS <sub>6</sub> | 2.549 |

|    |                                                   |       |
|----|---------------------------------------------------|-------|
| 57 | Ag <sub>2</sub> In <sub>2</sub> SiSe <sub>6</sub> | 2.645 |
| 58 | Ag <sub>2</sub> In <sub>2</sub> GeSe <sub>6</sub> | 2.716 |
| 59 | Ag <sub>2</sub> SiS <sub>3</sub>                  | 2.479 |
| 60 | Ag <sub>2</sub> GeS <sub>3</sub>                  | 2.881 |
| 61 | Cu <sub>2</sub> GeS <sub>3</sub>                  | 3.912 |
| 62 | Cu <sub>2</sub> GeSe <sub>3</sub>                 | 3.982 |
| 63 | Ag <sub>2</sub> SnSe <sub>3</sub>                 | 3.030 |
| 64 | Ag <sub>2</sub> SnTe <sub>3</sub>                 | 3.718 |
| 65 | Ag <sub>4</sub> P <sub>2</sub> S <sub>6</sub>     | 2.677 |
| 66 | Ag <sub>4</sub> P <sub>2</sub> Se <sub>6</sub>    | 2.924 |
| 67 | BaZnSiSe <sub>4</sub>                             | 2.366 |
| 68 | BaZnGeSe <sub>4</sub>                             | 2.510 |
| 69 | BaHg <sub>2</sub> As <sub>2</sub> S <sub>6</sub>  | 2.620 |
| 70 | BaCd <sub>2</sub> As <sub>2</sub> S <sub>6</sub>  | 2.640 |
| 71 | Ba <sub>2</sub> AlSbS <sub>5</sub>                | 2.533 |
| 72 | Ba <sub>2</sub> GaBiSe <sub>5</sub>               | 2.885 |
| 73 | Ba <sub>2</sub> AsGaSe <sub>5</sub>               | 2.640 |
| 74 | Ba <sub>2</sub> LaGaSe <sub>5</sub>               | 2.706 |
| 75 | Ba <sub>2</sub> LuGaSe <sub>5</sub>               | 2.557 |
| 76 | Ba <sub>2</sub> LuInSe <sub>5</sub>               | 2.631 |
| 77 | Ba <sub>4</sub> AgInS <sub>6</sub>                | 2.506 |
| 78 | CsCu <sub>5</sub> S <sub>3</sub>                  | 3.089 |
| 79 | CsCu <sub>5</sub> Se <sub>3</sub>                 | 3.282 |
| 80 | K <sub>2</sub> Cu <sub>2</sub> GeS <sub>4</sub>   | 2.549 |
| 81 | Li <sub>2</sub> In <sub>2</sub> SiS <sub>6</sub>  | 2.330 |
| 82 | Li <sub>2</sub> In <sub>2</sub> SiSe <sub>6</sub> | 2.460 |
| 83 | Li <sub>2</sub> In <sub>2</sub> GeS <sub>6</sub>  | 2.371 |
| 84 | Li <sub>2</sub> In <sub>2</sub> GeSe <sub>6</sub> | 2.527 |
| 85 | Lu <sub>5</sub> GaS <sub>9</sub>                  | 2.542 |
| 86 | SrCdGeS <sub>4</sub>                              | 2.397 |
| 87 | SrCdGeSe <sub>4</sub>                             | 2.553 |
| 88 | TlInGe <sub>2</sub> S <sub>6</sub>                | 2.635 |
| 89 | TlInGe <sub>2</sub> Se <sub>6</sub>               | 2.787 |
| 90 | TlGaSn <sub>2</sub> Se <sub>6</sub>               | 2.569 |
| 91 | Tl <sub>2</sub> PbZrS <sub>4</sub>                | 4.375 |
| 92 | Tl <sub>2</sub> PbZrSe <sub>4</sub>               | 4.524 |
| 93 | Tl <sub>2</sub> PbHfS <sub>4</sub>                | 4.326 |
| 94 | Tl <sub>2</sub> PbHfSe <sub>4</sub>               | 4.424 |
| 95 | Tl <sub>2</sub> CdGeSe <sub>4</sub>               | 3.647 |
| 96 | Tl <sub>2</sub> CdSnSe <sub>4</sub>               | 3.535 |
| 97 | Tl <sub>2</sub> HgGeSe <sub>4</sub>               | 3.715 |
| 98 | Tl <sub>2</sub> HgSiSe <sub>4</sub>               | 3.701 |
| 99 | Tl <sub>2</sub> HgSnS <sub>4</sub>                | 3.605 |

**Table S5** The calculated elastic constants  $C_{ij}$  (GPa) for the 99 crystals.

| #  | Crystal                                           | $C_{11}$ | $C_{12}$ | $C_{13}$ | $C_{21}$ | $C_{22}$ | $C_{23}$ | $C_{31}$ | $C_{32}$ | $C_{33}$ | $C_{44}$ | $C_{55}$ | $C_{66}$ |
|----|---------------------------------------------------|----------|----------|----------|----------|----------|----------|----------|----------|----------|----------|----------|----------|
| 1  | Cu <sub>2</sub> ZnSiS <sub>4</sub>                | 124.976  | 57.391   | 44.792   | 57.391   | 122.374  | 43.791   | 44.792   | 43.791   | 158.825  | 31.529   | 30.567   | 34.298   |
| 2  | Cu <sub>2</sub> ZnSiSe <sub>4</sub>               | 96.229   | 45.824   | 34.392   | 45.824   | 103.007  | 37.524   | 34.392   | 37.524   | 128.882  | 25.042   | 23.982   | 27.049   |
| 3  | Cu <sub>2</sub> ZnSiTe <sub>4</sub>               | 63.565   | 35.569   | 37.890   | 35.569   | 72.856   | 42.541   | 37.890   | 42.541   | 73.652   | 32.672   | 32.688   | 30.949   |
| 4  | Cu <sub>2</sub> ZnGeS <sub>4</sub>                | 120.211  | 52.512   | 40.167   | 52.512   | 116.010  | 37.896   | 40.166   | 37.896   | 149.271  | 29.284   | 28.284   | 32.728   |
| 5  | Cu <sub>2</sub> ZnGeSe <sub>4</sub>               | 77.649   | 47.234   | 44.566   | 47.234   | 86.378   | 48.803   | 44.566   | 48.803   | 75.521   | 35.650   | 35.570   | 33.268   |
| 6  | Cu <sub>2</sub> ZnSnS <sub>4</sub>                | 72.691   | 43.560   | 55.953   | 43.560   | 85.985   | 62.501   | 55.953   | 62.501   | 110.213  | 41.257   | 41.460   | 40.641   |
| 7  | Cu <sub>2</sub> ZnSnSe <sub>4</sub>               | 58.336   | 32.462   | 43.225   | 32.462   | 64.581   | 46.351   | 43.225   | 46.351   | 86.307   | 32.969   | 33.471   | 32.705   |
| 8  | Cu <sub>2</sub> ZnSnTe <sub>4</sub>               | 58.309   | 35.196   | 35.468   | 35.196   | 63.549   | 38.069   | 35.468   | 38.069   | 64.511   | 27.304   | 27.251   | 27.084   |
| 9  | Cu <sub>2</sub> CdSiS <sub>4</sub>                | 115.978  | 57.955   | 44.042   | 57.955   | 113.375  | 42.610   | 44.042   | 42.610   | 134.174  | 25.553   | 26.324   | 28.012   |
| 10 | Cu <sub>2</sub> CdSiSe <sub>4</sub>               | 92.815   | 45.688   | 34.498   | 45.688   | 87.940   | 31.211   | 34.498   | 31.211   | 106.086  | 20.252   | 21.125   | 22.874   |
| 11 | Cu <sub>2</sub> CdGeS <sub>4</sub>                | 107.377  | 53.835   | 45.122   | 53.835   | 107.520  | 45.241   | 45.122   | 45.241   | 137.512  | 23.802   | 23.980   | 26.313   |
| 12 | Cu <sub>2</sub> CdGeSe <sub>4</sub>               | 79.622   | 49.112   | 48.528   | 49.112   | 78.109   | 47.718   | 48.528   | 47.718   | 72.839   | 32.070   | 31.906   | 33.251   |
| 13 | Cu <sub>2</sub> CdGeTe <sub>4</sub>               | 61.859   | 33.689   | 37.224   | 33.689   | 56.851   | 34.725   | 37.224   | 34.725   | 61.191   | 25.808   | 26.211   | 26.277   |
| 14 | Cu <sub>2</sub> CdSnS <sub>4</sub>                | 81.601   | 49.905   | 56.101   | 49.905   | 78.827   | 54.768   | 56.101   | 54.768   | 89.189   | 35.515   | 35.381   | 34.104   |
| 15 | Cu <sub>2</sub> CdSnSe <sub>4</sub>               | 53.107   | 28.512   | 29.042   | 28.512   | 53.405   | 29.165   | 29.042   | 29.165   | 53.578   | 28.665   | 28.535   | 28.883   |
| 16 | Cu <sub>2</sub> CdSnTe <sub>4</sub>               | 53.240   | 31.697   | 41.200   | 31.697   | 55.045   | 42.130   | 41.200   | 42.130   | 74.027   | 24.182   | 24.100   | 23.996   |
| 17 | Cu <sub>2</sub> HgGeS <sub>4</sub>                | 91.607   | 41.997   | 34.980   | 41.997   | 62.280   | 20.251   | 34.980   | 20.251   | 44.574   | 38.184   | 38.072   | 41.502   |
| 18 | Cu <sub>2</sub> HgGeSe <sub>4</sub>               | 76.607   | 42.868   | 46.248   | 42.868   | 66.328   | 41.050   | 46.248   | 41.050   | 67.276   | 31.611   | 31.175   | 30.375   |
| 19 | Cu <sub>2</sub> HgGeTe <sub>4</sub>               | 59.697   | 35.159   | 33.704   | 35.159   | 61.822   | 34.719   | 33.704   | 34.719   | 54.490   | 26.612   | 26.509   | 27.334   |
| 20 | Cu <sub>2</sub> HgSnS <sub>4</sub>                | 92.442   | 65.655   | 64.542   | 65.655   | 95.905   | 66.146   | 64.542   | 66.146   | 94.226   | 33.419   | 33.155   | 35.502   |
| 21 | Cu <sub>2</sub> HgSnSe <sub>4</sub>               | 69.685   | 46.054   | 46.316   | 46.054   | 72.405   | 47.754   | 46.316   | 47.754   | 70.463   | 28.198   | 28.222   | 28.303   |
| 22 | Cu <sub>2</sub> HgSnTe <sub>4</sub>               | 56.820   | 34.403   | 34.799   | 34.403   | 56.934   | 34.881   | 34.799   | 34.881   | 56.881   | 25.068   | 24.708   | 24.928   |
| 23 | Cu <sub>2</sub> BaGeS <sub>4</sub>                | 91.526   | 57.293   | 35.981   | 57.293   | 85.189   | 33.136   | 35.981   | 33.136   | 45.259   | 14.519   | 14.432   | 16.261   |
| 24 | Cu <sub>2</sub> BaGeSe <sub>4</sub>               | 74.751   | 27.232   | 29.783   | 27.232   | 74.851   | 29.275   | 29.783   | 29.275   | 76.172   | 23.457   | 23.792   | 23.722   |
| 25 | Cu <sub>2</sub> SrSiS <sub>4</sub>                | 106.158  | 36.917   | 44.395   | 36.917   | 100.984  | 41.916   | 44.395   | 41.916   | 117.708  | 31.362   | 31.478   | 33.361   |
| 26 | Cu <sub>2</sub> SrGeS <sub>4</sub>                | 121.086  | 52.218   | 52.595   | 52.218   | 102.803  | 43.683   | 52.595   | 43.683   | 102.665  | 28.609   | 29.105   | 30.070   |
| 27 | Cu <sub>2</sub> SrGeSe <sub>4</sub>               | 86.694   | 28.535   | 29.741   | 28.535   | 57.957   | 13.409   | 29.741   | 13.409   | 83.557   | 17.348   | 23.242   | 19.489   |
| 28 | Cu <sub>2</sub> BaSnS <sub>4</sub>                | 54.238   | 27.629   | 24.297   | 27.629   | 33.311   | 13.575   | 24.297   | 13.575   | 27.860   | 10.552   | 9.874    | 3.574    |
| 29 | Cu <sub>2</sub> BaSnSe <sub>4</sub>               | 68.021   | 23.982   | 27.424   | 23.982   | 54.231   | 15.902   | 27.424   | 15.902   | 71.806   | 15.819   | 21.226   | 18.588   |
| 30 | Cu <sub>2</sub> SrSnS <sub>4</sub>                | 81.661   | 37.439   | 34.976   | 37.439   | 83.164   | 36.293   | 34.976   | 36.293   | 79.998   | 23.533   | 23.361   | 22.766   |
| 31 | Cu <sub>2</sub> SrSnSe <sub>4</sub>               | 69.817   | 26.140   | 19.786   | 26.140   | 55.530   | 10.355   | 19.786   | 10.355   | 72.686   | 15.669   | 20.656   | 17.804   |
| 32 | Cu <sub>2</sub> MgSiS <sub>4</sub>                | 118.587  | 53.850   | 50.725   | 53.850   | 102.415  | 40.535   | 50.725   | 40.535   | 135.986  | 25.646   | 26.055   | 28.408   |
| 33 | Cu <sub>2</sub> MgSiSe <sub>4</sub>               | 89.5117  | 40.327   | 37.097   | 40.327   | 83.675   | 33.952   | 37.097   | 33.9518  | 111.539  | 20.349   | 20.702   | 22.255   |
| 34 | Cu <sub>2</sub> MgGeS <sub>4</sub>                | 126.815  | 66.822   | 46.391   | 66.822   | 118.181  | 43.109   | 46.391   | 43.109   | 118.821  | 24.575   | 23.829   | 26.440   |
| 35 | Cu <sub>2</sub> MgSnS <sub>4</sub>                | 96.3197  | 62.230   | 55.544   | 62.230   | 88.115   | 51.446   | 55.544   | 51.446   | 75.628   | 36.222   | 36.388   | 35.120   |
| 36 | Cu <sub>2</sub> MgSnSe <sub>4</sub>               | 70.736   | 44.451   | 43.001   | 44.451   | 68.456   | 41.848   | 43.001   | 41.848   | 64.961   | 29.271   | 29.221   | 28.145   |
| 37 | Cu <sub>2</sub> MgSnTe <sub>4</sub>               | 60.0377  | 37.087   | 34.139   | 37.087   | 57.992   | 33.112   | 34.139   | 33.1118  | 51.7118  | 23.712   | 23.550   | 21.842   |
| 38 | Ag <sub>2</sub> ZnSiS <sub>4</sub>                | 53.457   | -22.437  | 42.503   | -22.437  | -2.748   | -10.656  | 42.503   | -10.656  | 76.139   | -2.695   | 25.667   | -2.784   |
| 39 | Ag <sub>2</sub> ZnSnS <sub>4</sub>                | 71.801   | 48.005   | 47.971   | 48.005   | 71.685   | 47.955   | 47.971   | 47.955   | 67.4917  | 27.074   | 26.925   | 28.778   |
| 40 | Ag <sub>2</sub> ZnSnSe <sub>4</sub>               | 61.230   | 40.581   | 40.641   | 40.581   | 61.196   | 40.623   | 40.641   | 40.623   | 57.131   | 22.924   | 23.187   | 23.730   |
| 41 | Ag <sub>2</sub> CdGeS <sub>4</sub>                | 76.828   | 42.406   | 38.791   | 42.406   | 71.311   | 36.552   | 38.791   | 36.552   | 92.942   | 16.185   | 14.349   | 16.290   |
| 42 | Ag <sub>2</sub> CdSnS <sub>4</sub>                | 63.466   | 44.086   | 45.333   | 44.086   | 63.341   | 45.326   | 45.333   | 45.326   | 62.837   | 22.994   | 23.163   | 23.059   |
| 43 | Ag <sub>2</sub> CdSnSe <sub>4</sub>               | 55.160   | 37.990   | 39.102   | 37.990   | 55.158   | 39.100   | 39.102   | 39.100   | 53.765   | 19.968   | 19.834   | 19.925   |
| 44 | Ag <sub>2</sub> CdSnTe <sub>4</sub>               | 47.132   | 31.145   | 32.097   | 31.145   | 47.116   | 32.107   | 32.097   | 32.107   | 45.540   | 17.551   | 17.517   | 16.093   |
| 45 | Ag <sub>2</sub> HgSnS <sub>4</sub>                | 68.560   | 40.264   | 34.727   | 40.264   | 69.749   | 36.083   | 34.727   | 36.083   | 85.812   | 13.058   | 12.766   | 14.130   |
| 46 | Ag <sub>2</sub> HgSnSe <sub>4</sub>               | 59.111   | 35.892   | 31.231   | 35.892   | 58.706   | 29.974   | 31.231   | 29.974   | 73.069   | 11.029   | 10.617   | 11.716   |
| 47 | Ag <sub>2</sub> BaGeS <sub>4</sub>                | 77.374   | 52.474   | 35.288   | 52.474   | 76.402   | 35.335   | 35.288   | 35.335   | 45.096   | 18.817   | 18.758   | 24.899   |
| 48 | Ag <sub>2</sub> BaGeSe <sub>4</sub>               | 76.896   | 31.395   | 24.057   | 31.395   | 34.235   | 19.477   | 24.057   | 19.477   | 39.674   | 12.256   | 13.807   | 16.255   |
| 49 | Ag <sub>2</sub> BaSnS <sub>4</sub>                | 36.370   | 19.794   | 28.966   | 19.794   | 43.647   | 23.611   | 28.966   | 23.611   | 79.775   | 15.707   | 15.190   | 12.780   |
| 50 | Ag <sub>2</sub> BaSnSe <sub>4</sub>               | 68.014   | 26.482   | 20.622   | 26.482   | 30.774   | 17.588   | 20.622   | 17.588   | 36.255   | 11.128   | 12.724   | 13.802   |
| 51 | Ag <sub>2</sub> SrGeS <sub>4</sub>                | 43.133   | 28.024   | 38.966   | 28.024   | 49.684   | 32.831   | 38.966   | 32.831   | 97.287   | 18.336   | 14.875   | 16.842   |
| 52 | Ag <sub>2</sub> SrGeSe <sub>4</sub>               | 80.985   | 33.469   | 26.381   | 33.469   | 34.559   | 23.170   | 26.381   | 23.170   | 42.890   | 12.774   | 14.141   | 13.827   |
| 53 | Ag <sub>2</sub> SrSnS <sub>4</sub>                | 31.386   | 36.637   | 28.514   | 36.637   | 120.002  | 40.945   | 28.514   | 40.945   | 85.624   | 13.888   | 11.926   | 10.520   |
| 54 | Ag <sub>2</sub> SrSnSe <sub>4</sub>               | 73.253   | 26.703   | 22.009   | 26.703   | 27.094   | 20.446   | 22.009   | 20.446   | 40.819   | 9.307    | 11.774   | 11.225   |
| 55 | Ag <sub>2</sub> In <sub>2</sub> SiS <sub>6</sub>  | 62.397   | 24.651   | 18.747   | 24.651   | 48.765   | 21.433   | 18.747   | 21.433   | 54.904   | 16.189   | 18.491   | 15.286   |
| 56 | Ag <sub>2</sub> In <sub>2</sub> GeS <sub>6</sub>  | 59.840   | 22.764   | 16.832   | 22.764   | 46.533   | 20.049   | 16.832   | 20.049   | 51.170   | 16.026   | 17.930   | 15.674   |
| 57 | Ag <sub>2</sub> In <sub>2</sub> SiSe <sub>6</sub> | 51.461   | 20.407   | 14.099   | 20.407   | 42.726   | 17.660   | 14.099   | 17.660   | 47.593   | 14.958   | 15.841   | 13.838   |
| 58 | Ag <sub>2</sub> In <sub>2</sub> GeSe <sub>6</sub> | 48.802   | 19.024   | 12.829   | 19.024   | 40.715   | 16.820   | 12.829   | 16.820   | 45.953   | 14.302   | 15.031   | 14.160   |
| 59 | Ag <sub>2</sub> SiS <sub>3</sub>                  | 56.251   | 34.466   | 27.971   | 34.466   | 58.916   | 28.570   | 27.971   | 28.570   | 46.196   | 15.302   | 14.926   | 15.758   |
| 60 | Ag <sub>2</sub> GeS <sub>3</sub>                  | 71.166   | 41.876   | 35.486   | 41.876   | 77.900   | 38.918   | 35.486   | 38.918   | 86.252   | 14.643   | 15.354   | 16.457   |

|    |                                                   |         |        |        |        |         |        |        |        |         |        |        |        |
|----|---------------------------------------------------|---------|--------|--------|--------|---------|--------|--------|--------|---------|--------|--------|--------|
| 61 | Cu <sub>2</sub> GeS <sub>3</sub>                  | 134.693 | 56.017 | 49.563 | 56.017 | 138.913 | 53.530 | 49.563 | 53.530 | 137.221 | 27.360 | 27.744 | 38.041 |
| 62 | Cu <sub>2</sub> GeSe <sub>3</sub>                 | 90.258  | 22.124 | 33.831 | 22.124 | 91.791  | 45.794 | 33.831 | 45.794 | 70.491  | 35.640 | 36.984 | 17.619 |
| 63 | Ag <sub>2</sub> SnSe <sub>3</sub>                 | 46.999  | 12.497 | -1.610 | 12.497 | 44.1259 | 0.256  | -1.610 | 0.256  | -1.121  | -0.159 | -0.120 | 4.707  |
| 64 | Ag <sub>2</sub> SnTe <sub>3</sub>                 | 56.492  | 26.361 | 25.011 | 26.361 | 58.182  | 26.233 | 25.011 | 26.233 | 59.115  | 10.149 | 10.030 | 14.159 |
| 65 | Ag <sub>4</sub> P <sub>2</sub> S <sub>6</sub>     | 37.452  | 23.542 | 13.658 | 23.542 | 51.270  | 23.162 | 13.658 | 23.162 | 48.369  | 11.005 | 8.009  | 13.303 |
| 66 | Ag <sub>4</sub> P <sub>2</sub> Se <sub>6</sub>    | 31.154  | 18.140 | 15.169 | 18.140 | 46.173  | 20.972 | 15.169 | 20.972 | 62.375  | 11.283 | 8.404  | 13.372 |
| 67 | BaZnSiSe <sub>4</sub>                             | 40.965  | 16.652 | 14.171 | 16.652 | 40.530  | 14.486 | 14.171 | 14.486 | 64.844  | 15.783 | 11.062 | 11.318 |
| 68 | BaZnGeSe <sub>4</sub>                             | 39.497  | 16.506 | 13.042 | 16.506 | 39.480  | 13.947 | 13.042 | 13.947 | 61.662  | 14.608 | 9.338  | 10.987 |
| 69 | BaHg <sub>2</sub> As <sub>2</sub> S <sub>6</sub>  | 46.118  | 17.648 | 25.198 | 17.648 | 32.077  | 19.779 | 25.198 | 19.779 | 47.645  | 8.514  | 10.991 | 15.820 |
| 70 | BaCd <sub>2</sub> As <sub>2</sub> S <sub>6</sub>  | 46.680  | 16.588 | 28.578 | 16.588 | 34.653  | 20.911 | 28.578 | 20.911 | 54.494  | 11.812 | 13.559 | 13.439 |
| 71 | Ba <sub>2</sub> AlSbS <sub>5</sub>                | 56.807  | 13.313 | 12.537 | 13.313 | 57.296  | 21.717 | 12.537 | 21.717 | 41.783  | 23.407 | 15.138 | 12.243 |
| 72 | Ba <sub>2</sub> GaBiSe <sub>5</sub>               | 54.028  | 13.957 | 12.762 | 13.957 | 50.574  | 23.053 | 12.762 | 23.053 | 34.942  | 21.601 | 13.082 | 12.918 |
| 73 | Ba <sub>2</sub> AsGaSe <sub>5</sub>               | 47.541  | 9.792  | 12.274 | 9.792  | 44.902  | 17.968 | 12.274 | 17.968 | 38.743  | 20.964 | 12.079 | 10.432 |
| 74 | Ba <sub>2</sub> LaGaSe <sub>5</sub>               | 56.987  | 25.786 | 17.675 | 25.786 | 82.040  | 37.402 | 17.675 | 37.402 | 53.490  | 28.969 | 12.802 | 21.871 |
| 75 | Ba <sub>2</sub> LuGaSe <sub>5</sub>               | 56.099  | 21.670 | 20.891 | 21.670 | 67.588  | 17.551 | 20.891 | 17.551 | 38.863  | 19.413 | 16.909 | 23.118 |
| 76 | Ba <sub>2</sub> LuInSe <sub>5</sub>               | 79.547  | 20.711 | 25.759 | 20.711 | 46.703  | 26.135 | 25.759 | 26.135 | 54.520  | 17.584 | 25.982 | 21.249 |
| 77 | Ba <sub>4</sub> AgInSe <sub>6</sub>               | 70.360  | 26.779 | 20.979 | 26.779 | 59.713  | 28.105 | 20.979 | 28.105 | 62.069  | 22.670 | 19.739 | 25.820 |
| 78 | CsCu <sub>5</sub> S <sub>3</sub>                  | 89.317  | 30.515 | 30.104 | 30.515 | 93.144  | 22.175 | 30.104 | 22.175 | 44.843  | 9.642  | 10.110 | 20.477 |
| 79 | CsCu <sub>5</sub> Se <sub>3</sub>                 | 50.747  | 23.266 | 18.869 | 23.266 | 76.543  | 13.073 | 18.869 | 13.073 | 44.015  | 5.641  | 9.501  | 12.384 |
| 80 | K <sub>2</sub> Cu <sub>2</sub> GeS <sub>4</sub>   | 46.915  | 18.919 | 16.287 | 18.919 | 45.211  | 22.245 | 16.287 | 22.245 | 41.702  | 25.412 | 14.767 | 18.222 |
| 81 | Li <sub>2</sub> In <sub>2</sub> SiS <sub>6</sub>  | 54.789  | 18.628 | 15.121 | 18.628 | 38.523  | 12.765 | 15.121 | 12.765 | 56.461  | 15.127 | 18.488 | 17.284 |
| 82 | Li <sub>2</sub> In <sub>2</sub> SiSe <sub>6</sub> | 44.302  | 16.361 | 11.831 | 16.361 | 31.895  | 10.733 | 11.831 | 10.733 | 47.676  | 13.175 | 15.257 | 14.784 |
| 83 | Li <sub>2</sub> In <sub>2</sub> GeSe <sub>6</sub> | 51.774  | 17.779 | 14.309 | 17.779 | 37.755  | 12.434 | 14.309 | 12.434 | 54.835  | 14.871 | 17.995 | 16.915 |
| 84 | Li <sub>2</sub> In <sub>2</sub> GeSe <sub>6</sub> | 41.449  | 15.851 | 11.212 | 15.851 | 31.826  | 10.783 | 11.212 | 10.783 | 46.087  | 12.523 | 14.725 | 14.161 |
| 85 | Lu <sub>5</sub> GaS <sub>9</sub>                  | 94.631  | 38.181 | 28.394 | 38.181 | 87.606  | 29.276 | 28.394 | 29.276 | 88.562  | 29.456 | 27.999 | 39.844 |
| 86 | SrCdGeS <sub>4</sub>                              | 50.802  | 18.578 | 22.073 | 18.579 | 59.205  | 19.702 | 22.073 | 19.702 | 83.01   | 22.488 | 15.569 | 12.785 |
| 87 | SrCdGeSe <sub>4</sub>                             | 44.558  | 15.534 | 19.281 | 15.534 | 48.720  | 17.101 | 19.281 | 17.101 | 67.284  | 20.065 | 12.742 | 9.143  |
| 88 | TlInGe <sub>2</sub> S <sub>6</sub>                | 26.336  | 9.936  | 7.368  | 9.936  | 27.018  | 7.252  | 7.368  | 7.252  | 24.577  | 10.493 | 10.558 | 8.967  |
| 89 | TlInGe <sub>2</sub> Se <sub>6</sub>               | 20.923  | 7.654  | 6.508  | 7.654  | 20.517  | 6.521  | 6.508  | 6.521  | 20.370  | 6.840  | 6.476  | 7.142  |
| 90 | TlGaSn <sub>2</sub> Se <sub>6</sub>               | 21.987  | 5.729  | 6.283  | 5.729  | 22.677  | 6.326  | 6.283  | 6.326  | 21.722  | 7.413  | 6.075  | 8.384  |
| 91 | Tl <sub>2</sub> PbZrS <sub>4</sub>                | 71.592  | 20.608 | 30.530 | 20.608 | 77.784  | 30.792 | 30.530 | 30.792 | 65.220  | 31.490 | 28.886 | 20.175 |
| 92 | Tl <sub>2</sub> PbZrSe <sub>4</sub>               | 62.568  | 18.418 | 26.385 | 18.418 | 69.103  | 25.800 | 26.385 | 25.800 | 54.044  | 29.239 | 28.127 | 18.590 |
| 93 | Tl <sub>2</sub> PbHfS <sub>4</sub>                | 73.009  | 21.428 | 30.886 | 21.428 | 79.663  | 31.599 | 30.886 | 31.599 | 66.162  | 31.080 | 30.297 | 19.067 |
| 94 | Tl <sub>2</sub> PbHfSe <sub>4</sub>               | 62.910  | 18.813 | 27.567 | 18.813 | 69.648  | 26.378 | 27.567 | 26.378 | 56.452  | 29.631 | 27.679 | 18.247 |
| 95 | Tl <sub>2</sub> CdGeSe <sub>4</sub>               | 35.066  | 16.506 | 13.086 | 16.506 | 35.053  | 13.110 | 13.086 | 13.110 | 65.206  | 7.475  | 7.586  | 7.795  |
| 96 | Tl <sub>2</sub> CdSnSe <sub>4</sub>               | 34.887  | 15.674 | 12.567 | 15.674 | 34.889  | 12.598 | 12.567 | 12.598 | 62.725  | 8.659  | 8.659  | 9.516  |
| 97 | Tl <sub>2</sub> HgGeSe <sub>4</sub>               | 33.585  | 17.241 | 12.772 | 17.241 | 33.632  | 12.799 | 12.772 | 12.799 | 61.386  | 6.186  | 6.156  | 8.609  |
| 98 | Tl <sub>2</sub> HgSiSe <sub>4</sub>               | 34.860  | 17.898 | 13.350 | 17.898 | 34.888  | 13.357 | 13.350 | 13.357 | 65.017  | 6.202  | 6.498  | 8.021  |
| 99 | Tl <sub>2</sub> HgSnS <sub>4</sub>                | 39.745  | 15.593 | 12.873 | 15.593 | 39.185  | 12.504 | 12.873 | 12.504 | 73.254  | 6.998  | 6.857  | 8.873  |



**Table S6** Calculated Young modulus (E), Bulk modulus (K), Shear modulus (G), Poisson's ratio ( $\eta$ ), and Pugh's modulus ratio (G/K) for the 99 crystals.

| #  | Crystal                             | E (GPa) | K (GPa) | G (GPa) | $\eta$ | G/K   |
|----|-------------------------------------|---------|---------|---------|--------|-------|
| 1  | Cu <sub>2</sub> ZnSiS <sub>4</sub>  | 93.126  | 77.250  | 35.843  | 0.299  | 0.464 |
| 2  | Cu <sub>2</sub> ZnSiSe <sub>4</sub> | 74.351  | 62.316  | 28.571  | 0.301  | 0.458 |
| 3  | Cu <sub>2</sub> ZnSiTe <sub>4</sub> | 61.878  | 48.641  | 24.022  | 0.288  | 0.494 |
| 4  | Cu <sub>2</sub> ZnGeS <sub>4</sub>  | 88.466  | 71.463  | 34.191  | 0.293  | 0.478 |
| 5  | Cu <sub>2</sub> ZnGeSe <sub>4</sub> | 66.938  | 56.607  | 25.688  | 0.302  | 0.454 |
| 6  | Cu <sub>2</sub> ZnSnS <sub>4</sub>  | 74.818  | 60.896  | 28.882  | 0.295  | 0.474 |
| 7  | Cu <sub>2</sub> ZnSnSe <sub>4</sub> | 60.584  | 48.061  | 23.484  | 0.290  | 0.488 |
| 8  | Cu <sub>2</sub> ZnSnTe <sub>4</sub> | 52.559  | 44.463  | 20.169  | 0.303  | 0.454 |
| 9  | Cu <sub>2</sub> CdSiS <sub>4</sub>  | 75.925  | 64.650  | 29.106  | 0.304  | 0.450 |
| 10 | Cu <sub>2</sub> CdSiSe <sub>4</sub> | 63.029  | 56.323  | 23.993  | 0.314  | 0.426 |
| 11 | Cu <sub>2</sub> CdGeS <sub>4</sub>  | 74.031  | 70.103  | 27.957  | 0.324  | 0.399 |
| 12 | Cu <sub>2</sub> CdGeSe <sub>4</sub> | 61.468  | 57.525  | 23.250  | 0.322  | 0.404 |
| 13 | Cu <sub>2</sub> CdGeTe <sub>4</sub> | 50.368  | 42.912  | 19.307  | 0.304  | 0.449 |
| 14 | Cu <sub>2</sub> CdSnS <sub>4</sub>  | 65.538  | 62.530  | 24.725  | 0.325  | 0.395 |
| 15 | Cu <sub>2</sub> CdSnSe <sub>4</sub> | 50.871  | 34.987  | 20.225  | 0.258  | 0.578 |
| 16 | Cu <sub>2</sub> CdSnTe <sub>4</sub> | 46.157  | 42.952  | 17.472  | 0.321  | 0.407 |
| 17 | Cu <sub>2</sub> HgGeS <sub>4</sub>  | 64.026  | 36.019  | 26.595  | 0.204  | 0.738 |
| 18 | Cu <sub>2</sub> HgGeSe <sub>4</sub> | 57.736  | 50.952  | 22.018  | 0.311  | 0.432 |
| 19 | Cu <sub>2</sub> HgGeTe <sub>4</sub> | 50.546  | 42.245  | 19.432  | 0.301  | 0.459 |
| 20 | Cu <sub>2</sub> HgSnS <sub>4</sub>  | 64.868  | 72.857  | 23.996  | 0.351  | 0.329 |
| 21 | Cu <sub>2</sub> HgSnSe <sub>4</sub> | 53.615  | 54.369  | 20.071  | 0.335  | 0.369 |
| 22 | Cu <sub>2</sub> HgSnTe <sub>4</sub> | 47.229  | 41.868  | 17.999  | 0.312  | 0.429 |
| 23 | Cu <sub>2</sub> BaGeS <sub>4</sub>  | 40.178  | 46.784  | 14.805  | 0.357  | 0.316 |
| 24 | Cu <sub>2</sub> BaGeSe <sub>4</sub> | 59.645  | 43.776  | 23.428  | 0.273  | 0.535 |
| 25 | Cu <sub>2</sub> SrSiS <sub>4</sub>  | 83.363  | 63.148  | 32.564  | 0.280  | 0.516 |
| 26 | Cu <sub>2</sub> SrGeS <sub>4</sub>  | 76.908  | 68.357  | 29.299  | 0.313  | 0.429 |
| 27 | Cu <sub>2</sub> SrGeSe <sub>4</sub> | 55.519  | 39.820  | 21.899  | 0.268  | 0.549 |
| 28 | Cu <sub>2</sub> BaSnS <sub>4</sub>  | 12.787  | 17.056  | 4.650   | 0.375  | 0.273 |
| 29 | Cu <sub>2</sub> BaSnSe <sub>4</sub> | 49.115  | 35.858  | 19.311  | 0.272  | 0.538 |
| 30 | Cu <sub>2</sub> SrSnS <sub>4</sub>  | 60.025  | 51.313  | 22.997  | 0.305  | 0.448 |
| 31 | Cu <sub>2</sub> SrSnSe <sub>4</sub> | 49.689  | 33.991  | 19.775  | 0.256  | 0.582 |
| 32 | Cu <sub>2</sub> MgSiS <sub>4</sub>  | 78.047  | 71.424  | 29.611  | 0.317  | 0.414 |
| 33 | Cu <sub>2</sub> MgSiSe <sub>4</sub> | 62.347  | 55.851  | 23.725  | 0.314  | 0.425 |
| 34 | Cu <sub>2</sub> MgGeS <sub>4</sub>  | 74.524  | 72.668  | 28.036  | 0.329  | 0.386 |
| 35 | Cu <sub>2</sub> MgSnS <sub>4</sub>  | 67.158  | 65.208  | 25.278  | 0.328  | 0.387 |
| 36 | Cu <sub>2</sub> MgSnSe <sub>4</sub> | 54.339  | 50.579  | 20.568  | 0.320  | 0.406 |
| 37 | Cu <sub>2</sub> MgSnTe <sub>4</sub> | 44.901  | 41.570  | 17.008  | 0.320  | 0.409 |
| 38 | Ag <sub>2</sub> ZnSiS <sub>4</sub>  | 34.698  | 21.450  | 14.100  | 0.230  | 0.657 |
| 39 | Ag <sub>2</sub> ZnSnS <sub>4</sub>  | 51.529  | 54.941  | 19.175  | 0.352  | 0.349 |
| 40 | Ag <sub>2</sub> ZnSnSe <sub>4</sub> | 43.804  | 46.639  | 16.303  | 0.343  | 0.349 |
| 41 | Ag <sub>2</sub> CdGeS <sub>4</sub>  | 46.640  | 52.740  | 17.241  | 0.353  | 0.327 |
| 42 | Ag <sub>2</sub> CdSnS <sub>4</sub>  | 43.192  | 50.553  | 15.908  | 0.358  | 0.315 |
| 43 | Ag <sub>2</sub> CdSnSe <sub>4</sub> | 37.396  | 43.665  | 13.776  | 0.357  | 0.315 |
| 44 | Ag <sub>2</sub> CdSnTe <sub>4</sub> | 32.876  | 36.491  | 32.876  | 0.350  | 0.901 |
| 45 | Ag <sub>2</sub> HgSnS <sub>4</sub>  | 41.254  | 49.446  | 15.156  | 0.360  | 0.306 |
| 46 | Ag <sub>2</sub> HgSnSe <sub>4</sub> | 34.389  | 42.686  | 12.590  | 0.365  | 0.295 |
| 47 | Ag <sub>2</sub> BaGeS <sub>4</sub>  | 44.575  | 46.035  | 16.650  | 0.339  | 0.362 |
| 48 | Ag <sub>2</sub> BaGeSe <sub>4</sub> | 33.695  | 30.678  | 12.793  | 0.317  | 0.417 |
| 49 | Ag <sub>2</sub> BaSnS <sub>4</sub>  | 36.533  | 31.614  | 13.972  | 0.307  | 0.442 |
| 50 | Ag <sub>2</sub> BaSnSe <sub>4</sub> | 30.550  | 27.316  | 11.628  | 0.314  | 0.426 |
| 51 | Ag <sub>2</sub> SrGeS <sub>4</sub>  | 40.220  | 40.102  | 15.088  | 0.333  | 0.376 |
| 52 | Ag <sub>2</sub> SrGeSe <sub>4</sub> | 32.853  | 33.213  | 12.303  | 0.335  | 0.370 |
| 53 | Ag <sub>2</sub> SrSnS <sub>4</sub>  | 37.847  | 39.987  | 14.098  | 0.342  | 0.352 |
| 54 | Ag <sub>2</sub> SrSnSe <sub>4</sub> | 27.609  | 28.254  | 10.324  | 0.337  | 0.365 |

|    |                                                   |        |        |        |       |       |
|----|---------------------------------------------------|--------|--------|--------|-------|-------|
| 55 | Ag <sub>2</sub> In <sub>2</sub> SiS <sub>6</sub>  | 42.267 | 32.698 | 16.452 | 0.284 | 0.503 |
| 56 | Ag <sub>2</sub> In <sub>2</sub> GeS <sub>6</sub>  | 41.125 | 30.522 | 16.122 | 0.275 | 0.528 |
| 57 | Ag <sub>2</sub> In <sub>2</sub> SiSe <sub>6</sub> | 37.318 | 27.264 | 14.670 | 0.272 | 0.538 |
| 58 | Ag <sub>2</sub> In <sub>2</sub> GeSe <sub>6</sub> | 36.026 | 25.737 | 14.220 | 0.266 | 0.552 |
| 59 | Ag <sub>2</sub> SiS <sub>3</sub>                  | 36.151 | 37.137 | 13.512 | 0.338 | 0.364 |
| 60 | Ag <sub>2</sub> GeS <sub>3</sub>                  | 45.946 | 51.853 | 16.988 | 0.352 | 0.327 |
| 61 | Cu <sub>2</sub> GeS <sub>3</sub>                  | 86.215 | 78.050 | 32.759 | 0.316 | 0.419 |
| 62 | Cu <sub>2</sub> GeSe <sub>3</sub>                 | 66.695 | 49.809 | 26.117 | 0.277 | 0.524 |
| 63 | Ag <sub>2</sub> SnSe <sub>3</sub>                 | 7.983  | 6.334  | 3.094  | 0.290 | 0.488 |
| 64 | Ag <sub>2</sub> SnTe <sub>3</sub>                 | 32.831 | 36.275 | 12.167 | 0.349 | 0.335 |
| 65 | Ag <sub>4</sub> P <sub>2</sub> S <sub>6</sub>     | 28.793 | 26.883 | 10.894 | 0.321 | 0.405 |
| 66 | Ag <sub>4</sub> P <sub>2</sub> Se <sub>6</sub>    | 30.814 | 26.386 | 11.803 | 0.305 | 0.447 |
| 67 | BaZnSiSe <sub>4</sub>                             | 35.352 | 25.914 | 13.889 | 0.272 | 0.536 |
| 68 | BaZnGeSe <sub>4</sub>                             | 33.095 | 24.950 | 12.939 | 0.279 | 0.518 |
| 69 | BaHg <sub>2</sub> As <sub>2</sub> S <sub>6</sub>  | 29.009 | 27.051 | 10.978 | 0.312 | 0.406 |
| 70 | BaCd <sub>2</sub> As <sub>2</sub> S <sub>6</sub>  | 32.183 | 28.554 | 12.263 | 0.312 | 0.429 |
| 71 | Ba <sub>2</sub> AlSbS <sub>5</sub>                | 41.785 | 27.607 | 16.744 | 0.247 | 0.606 |
| 72 | Ba <sub>2</sub> GaBiSe <sub>5</sub>               | 37.221 | 26.119 | 14.741 | 0.262 | 0.564 |
| 73 | Ba <sub>2</sub> AsGaSe <sub>5</sub>               | 35.469 | 23.427 | 14.214 | 0.247 | 0.607 |
| 74 | Ba <sub>2</sub> LaGaSe <sub>5</sub>               | 49.132 | 37.689 | 19.151 | 0.282 | 0.508 |
| 75 | Ba <sub>2</sub> LuGaSe <sub>5</sub>               | 44.828 | 30.228 | 17.890 | 0.252 | 0.592 |
| 76 | Ba <sub>2</sub> LuInSe <sub>5</sub>               | 49.157 | 35.308 | 19.384 | 0.268 | 0.549 |
| 77 | Ba <sub>4</sub> AgInS <sub>6</sub>                | 53.439 | 38.170 | 21.094 | 0.266 | 0.553 |
| 78 | CsCu <sub>3</sub> S <sub>3</sub>                  | 42.324 | 40.648 | 15.954 | 0.326 | 0.392 |
| 79 | CsCu <sub>3</sub> Se <sub>3</sub>                 | 33.026 | 30.929 | 12.490 | 0.322 | 0.404 |
| 80 | K <sub>2</sub> Cu <sub>2</sub> GeS <sub>4</sub>   | 37.130 | 25.715 | 14.741 | 0.259 | 0.573 |
| 81 | Li <sub>2</sub> In <sub>2</sub> SiS <sub>6</sub>  | 41.436 | 26.432 | 16.725 | 0.238 | 0.633 |
| 82 | Li <sub>2</sub> In <sub>2</sub> SiSe <sub>6</sub> | 34.625 | 22.032 | 13.983 | 0.238 | 0.635 |
| 83 | Li <sub>2</sub> In <sub>2</sub> GeS <sub>6</sub>  | 40.268 | 25.409 | 16.291 | 0.235 | 0.641 |
| 84 | Li <sub>2</sub> In <sub>2</sub> GeSe <sub>6</sub> | 33.268 | 21.337 | 13.413 | 0.240 | 0.629 |
| 85 | Lu <sub>5</sub> GaS <sub>9</sub>                  | 75.751 | 49.729 | 30.394 | 0.246 | 0.611 |
| 86 | SrCdGeS <sub>4</sub>                              | 46.681 | 34.140 | 18.347 | 0.272 | 0.537 |
| 87 | SrCdGeSe <sub>4</sub>                             | 38.147 | 28.854 | 14.905 | 0.279 | 0.517 |
| 88 | TlInGe <sub>2</sub> S <sub>6</sub>                | 21.375 | 13.930 | 8.589  | 0.244 | 0.617 |
| 89 | TlInGe <sub>2</sub> Se <sub>6</sub>               | 14.097 | 10.891 | 5.488  | 0.284 | 0.504 |
| 90 | TlGaSn <sub>2</sub> Se <sub>6</sub>               | 16.406 | 11.207 | 6.531  | 0.256 | 0.583 |
| 91 | Tl <sub>2</sub> PbZrS <sub>4</sub>                | 59.137 | 41.681 | 23.401 | 0.263 | 0.561 |
| 92 | Tl <sub>2</sub> PbZrSe <sub>4</sub>               | 52.858 | 35.969 | 21.057 | 0.255 | 0.585 |
| 93 | Tl <sub>2</sub> PbHfS <sub>4</sub>                | 59.568 | 42.615 | 23.507 | 0.267 | 0.552 |
| 94 | Tl <sub>2</sub> PbHfSe <sub>4</sub>               | 53.300 | 36.853 | 21.168 | 0.259 | 0.574 |
| 95 | Tl <sub>2</sub> CdGeSe <sub>4</sub>               | 26.123 | 23.841 | 9.915  | 0.317 | 0.416 |
| 96 | Tl <sub>2</sub> CdSnSe <sub>4</sub>               | 28.141 | 23.231 | 10.839 | 0.298 | 0.466 |
| 97 | Tl <sub>2</sub> HgGeSe <sub>4</sub>               | 23.976 | 23.190 | 9.0294 | 0.328 | 0.389 |
| 98 | Tl <sub>2</sub> HgSiSe <sub>4</sub>               | 24.498 | 24.184 | 9.202  | 0.331 | 0.380 |
| 99 | Tl <sub>2</sub> HgSnS <sub>4</sub>                | 28.160 | 25.140 | 10.721 | 0.313 | 0.426 |

#### 4. The Supplementary Figures

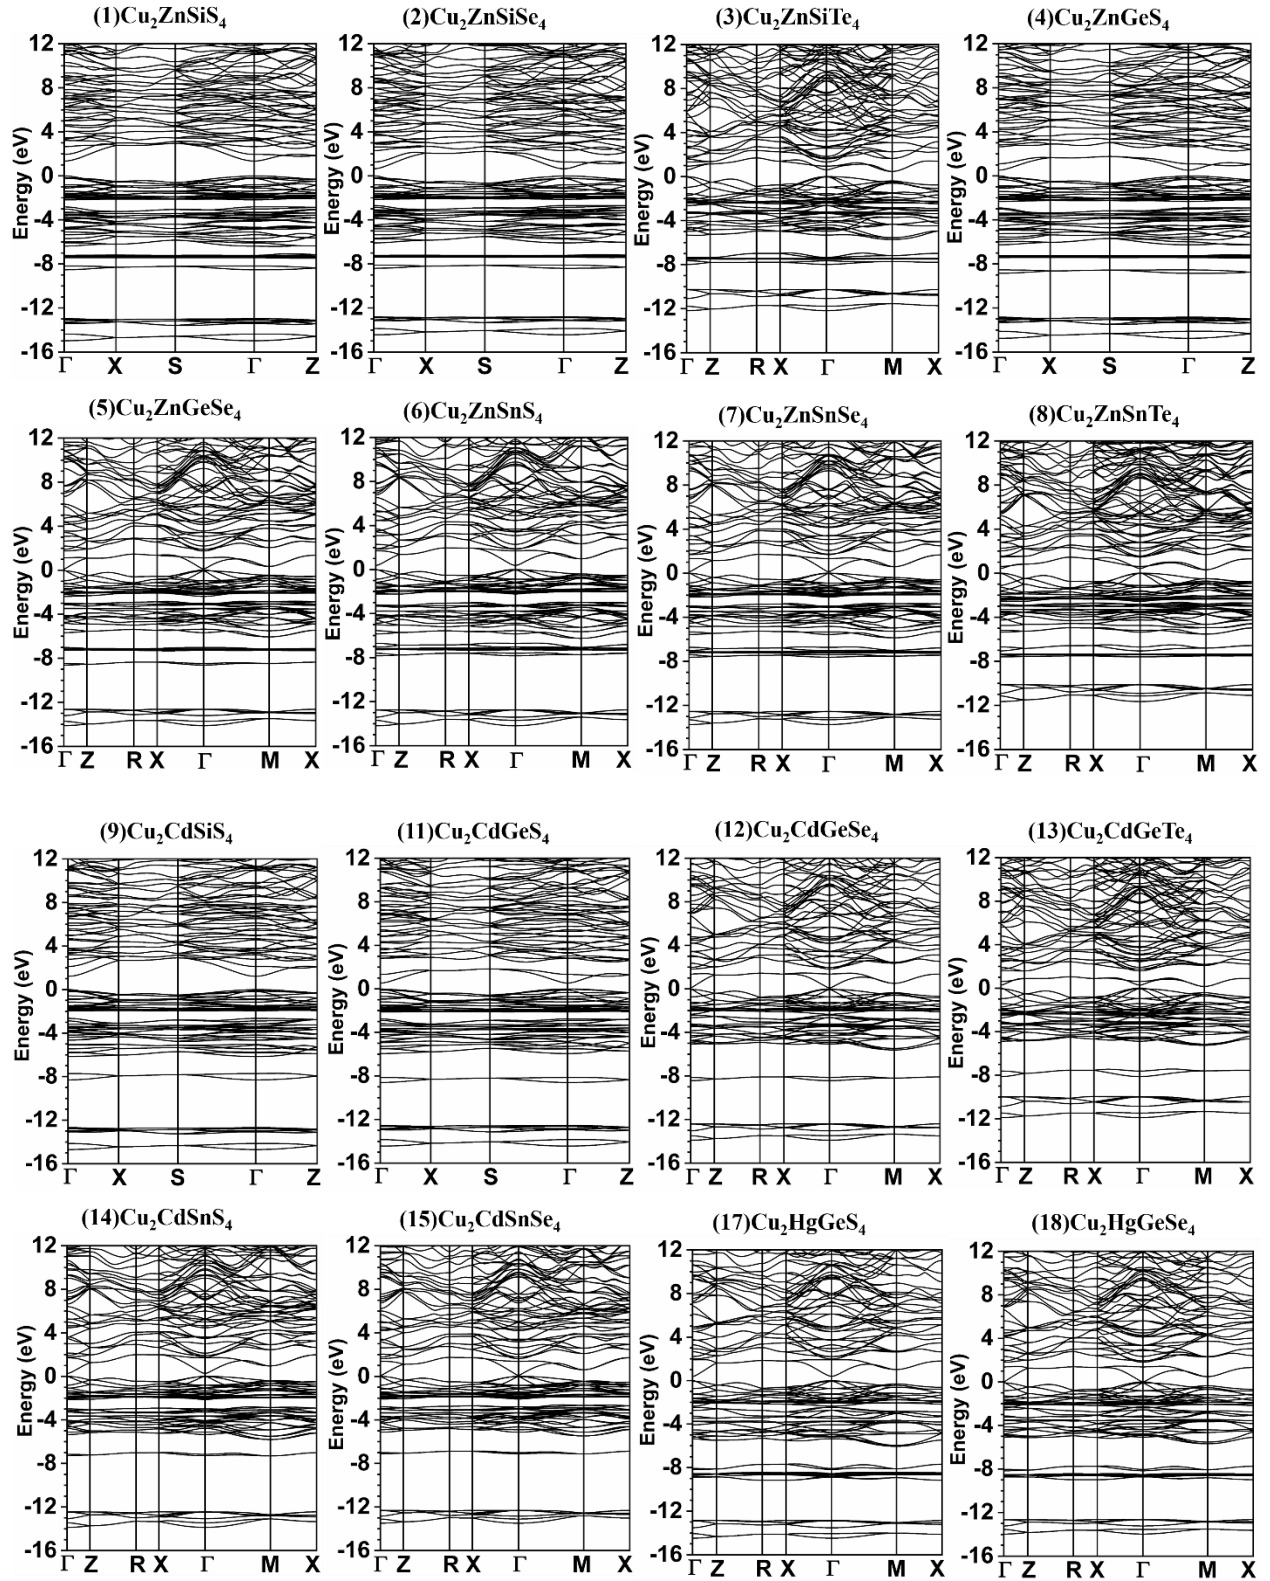

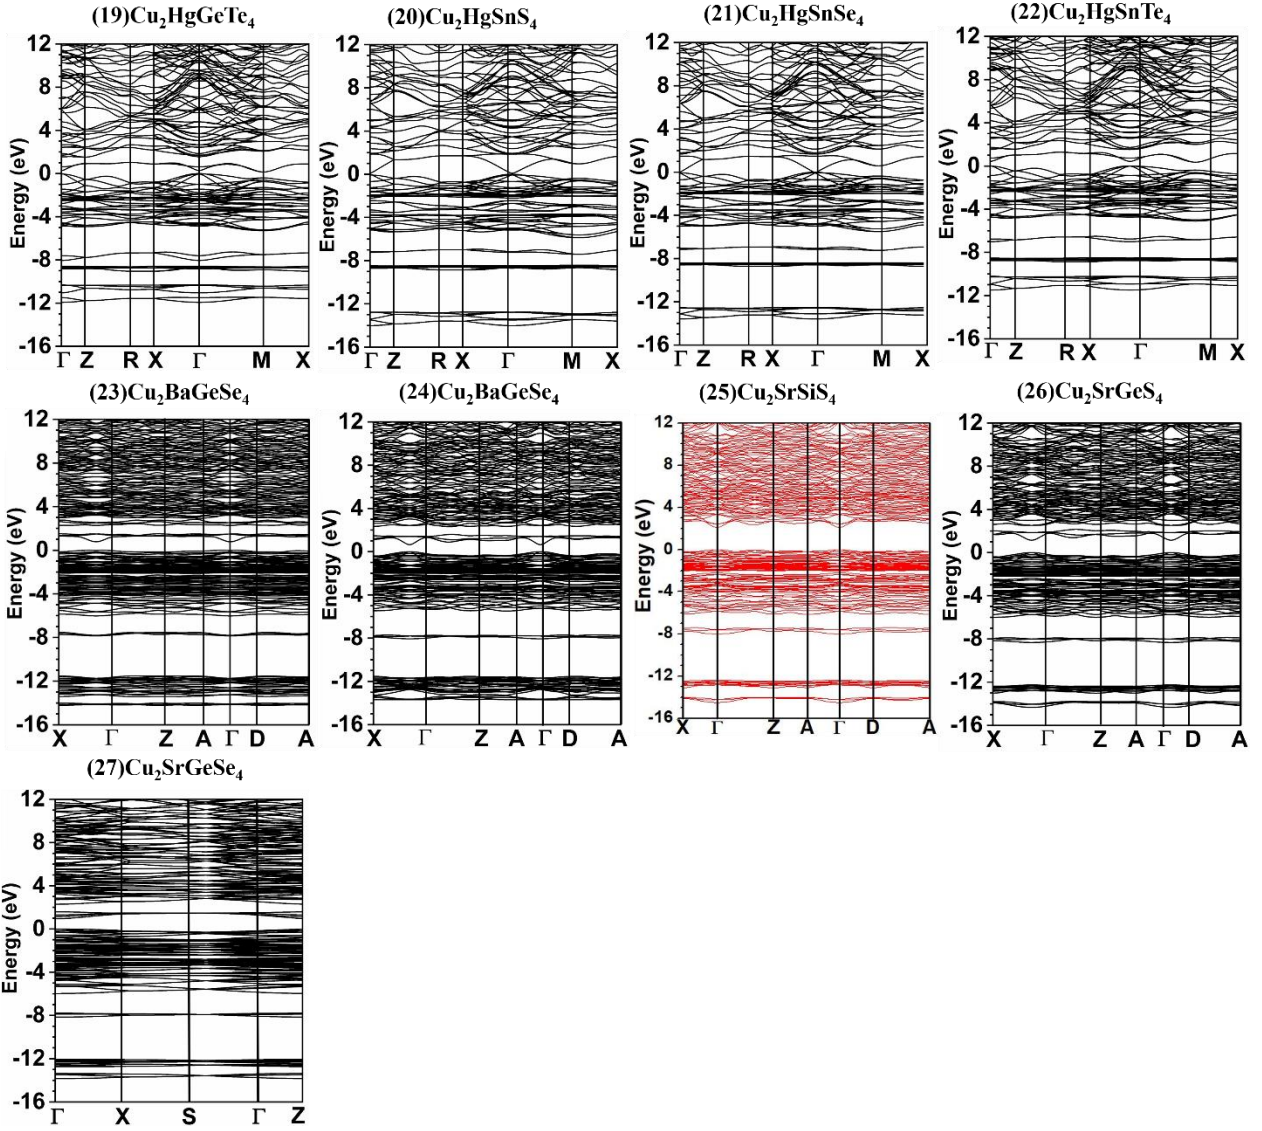

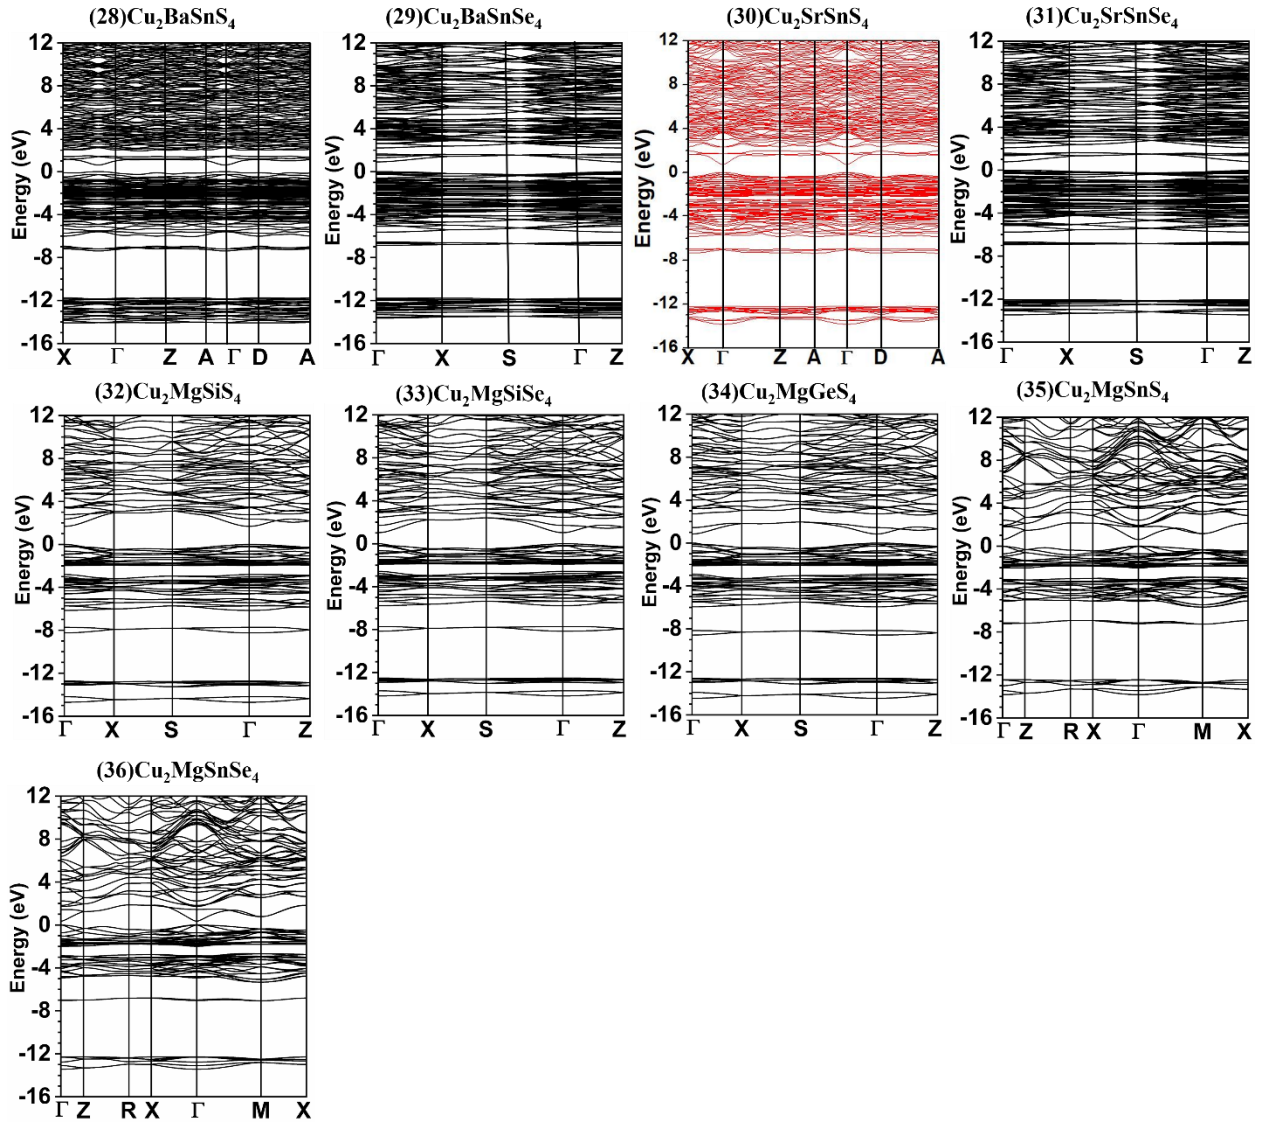



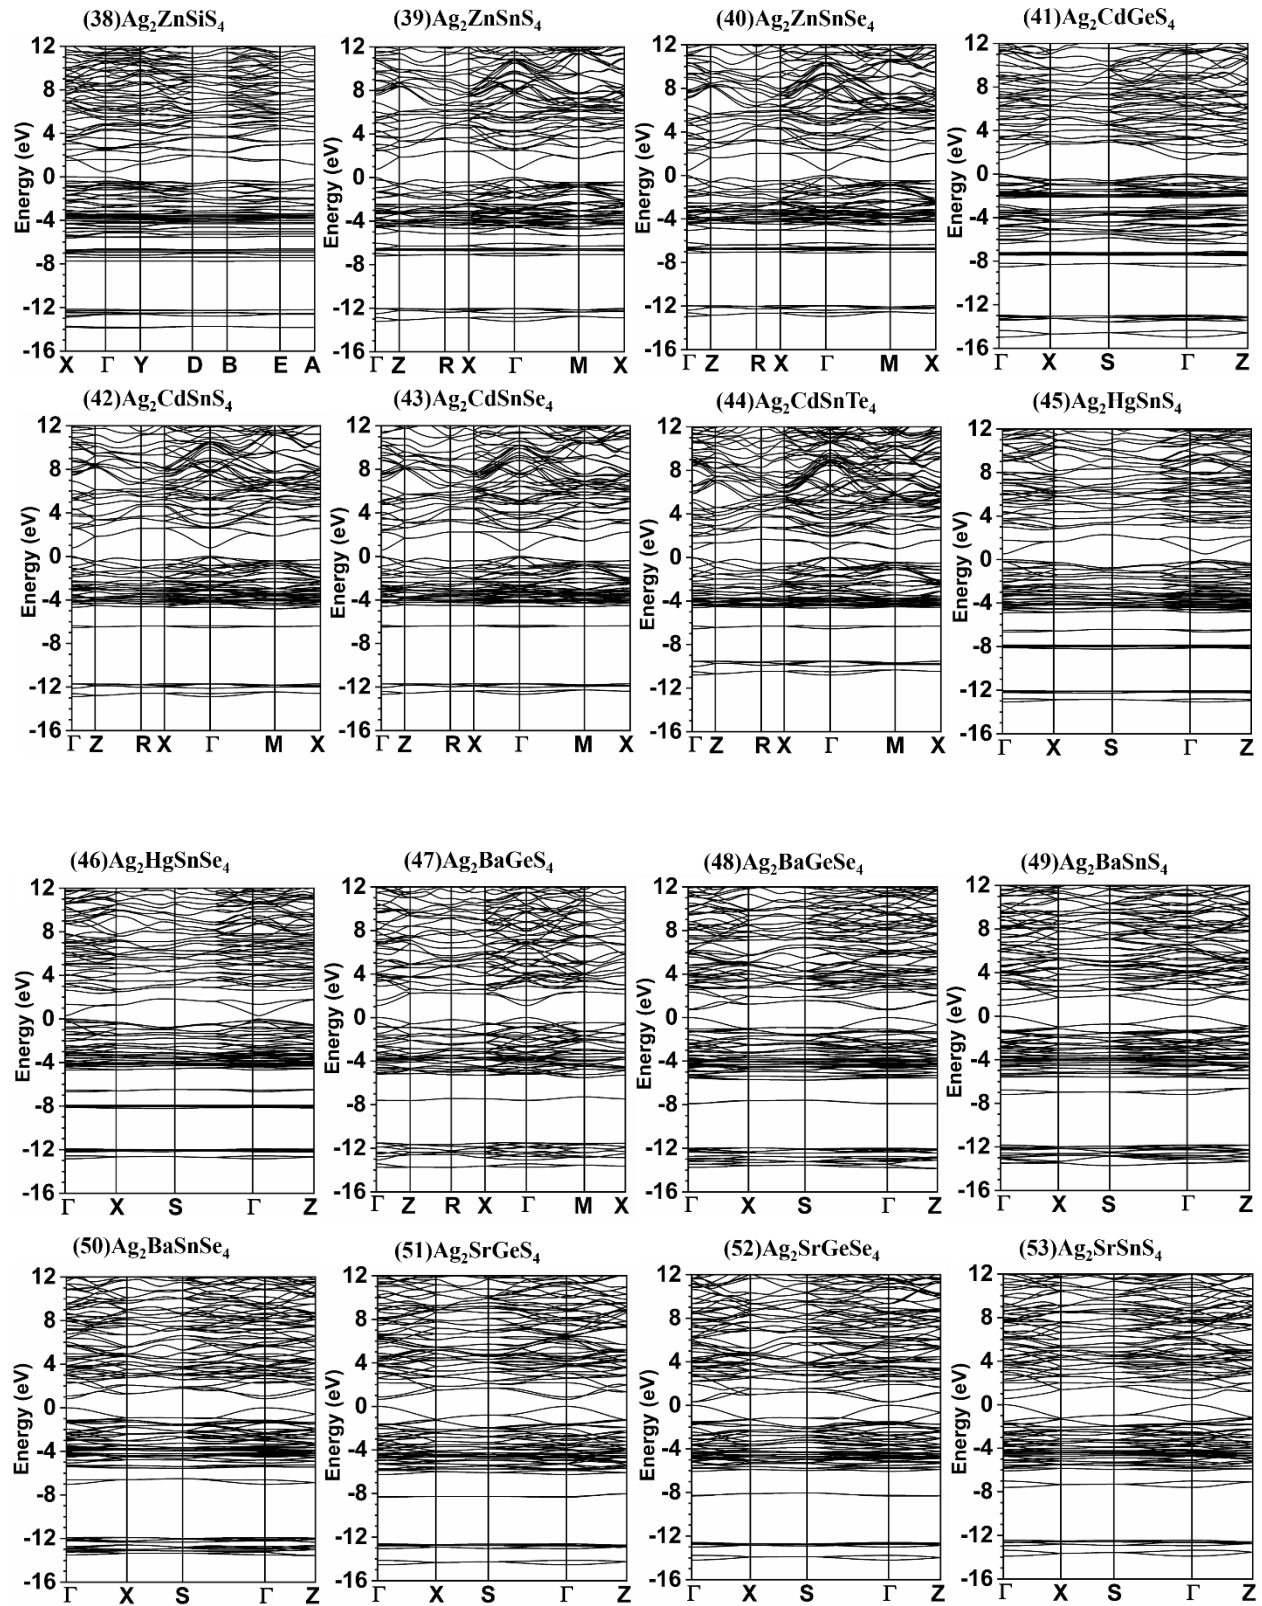

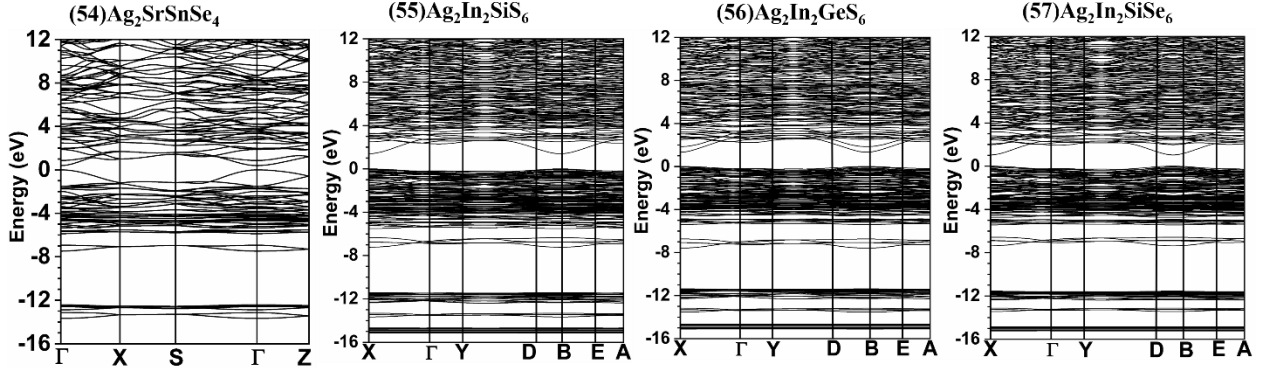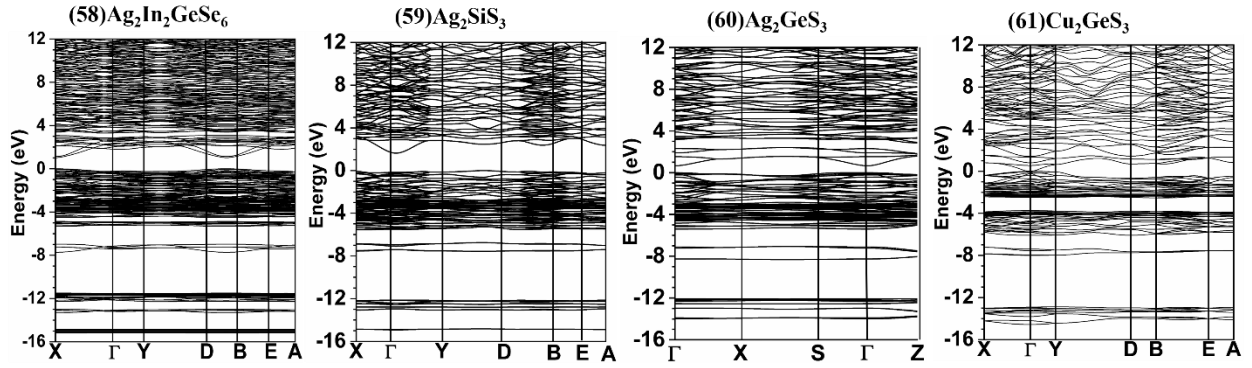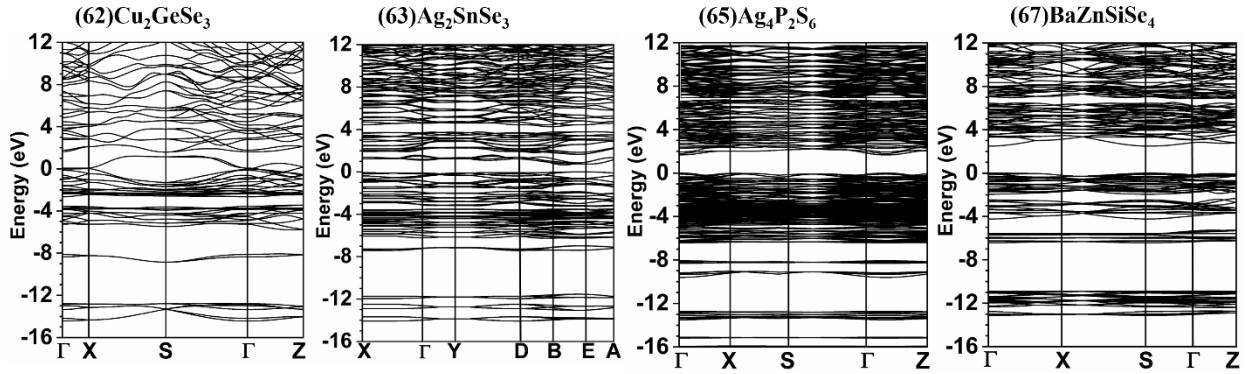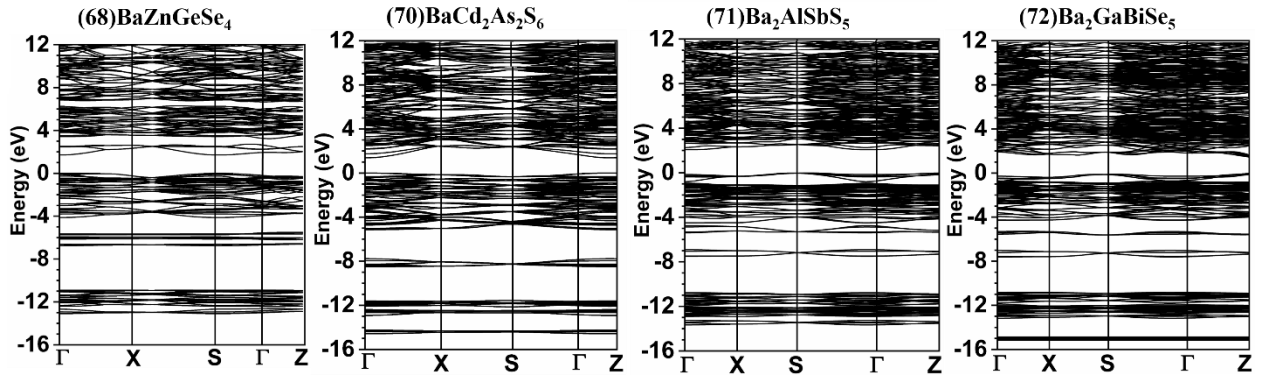

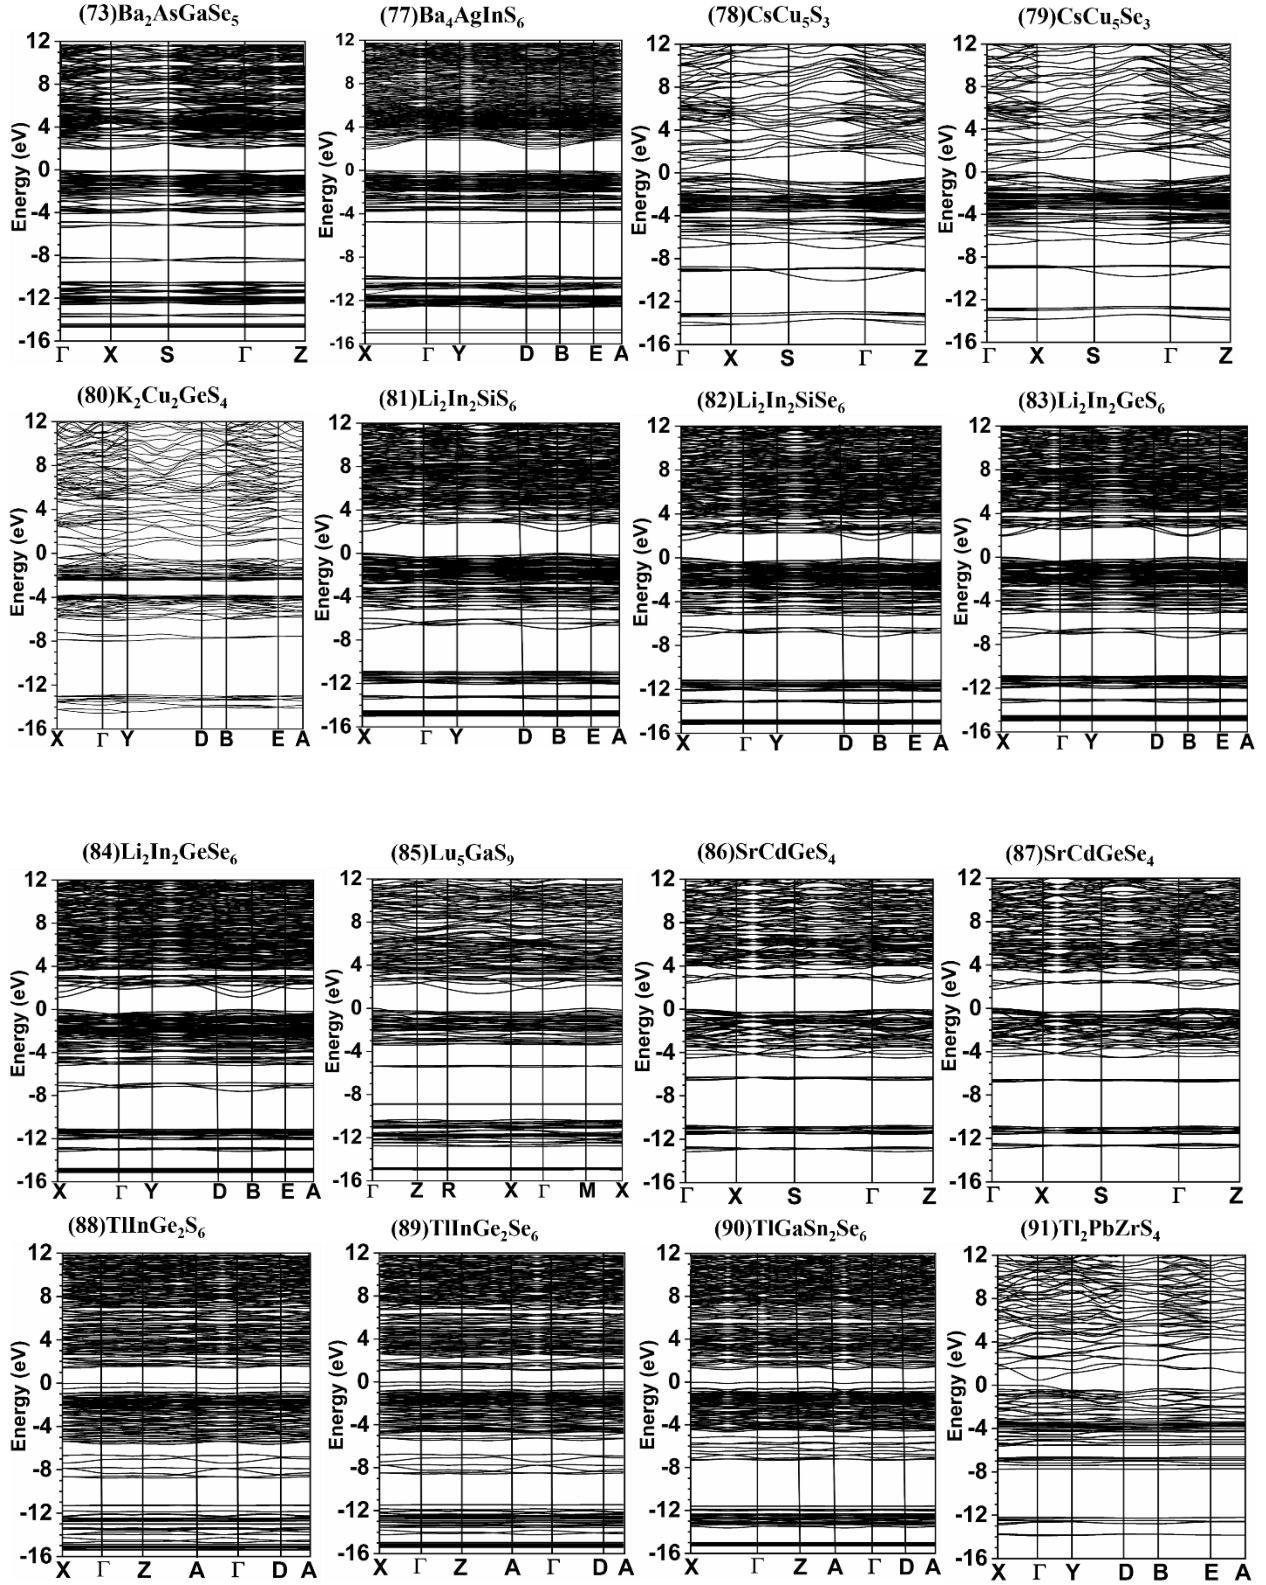



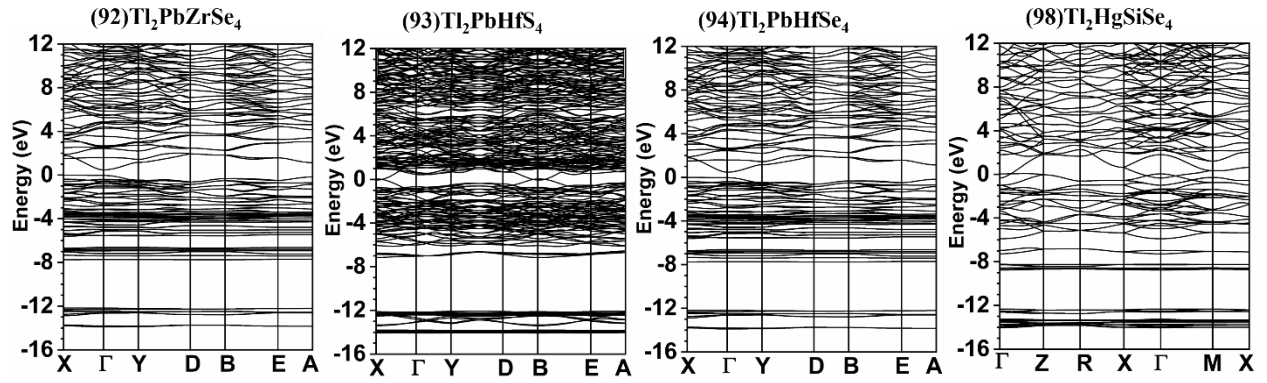

Fig.S1. Band structure for chalcogenide crystals.

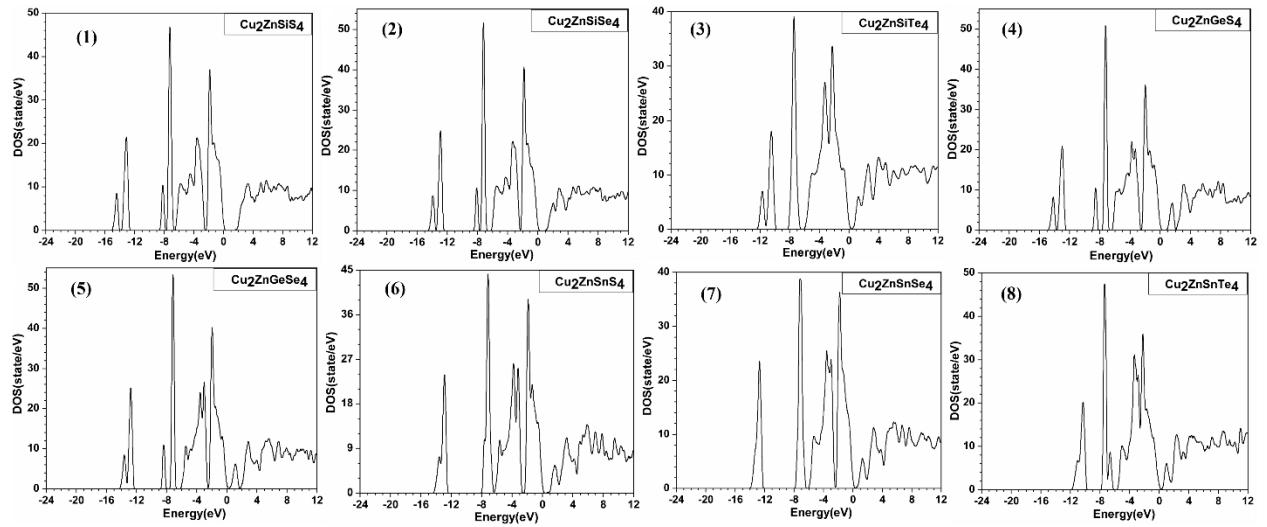

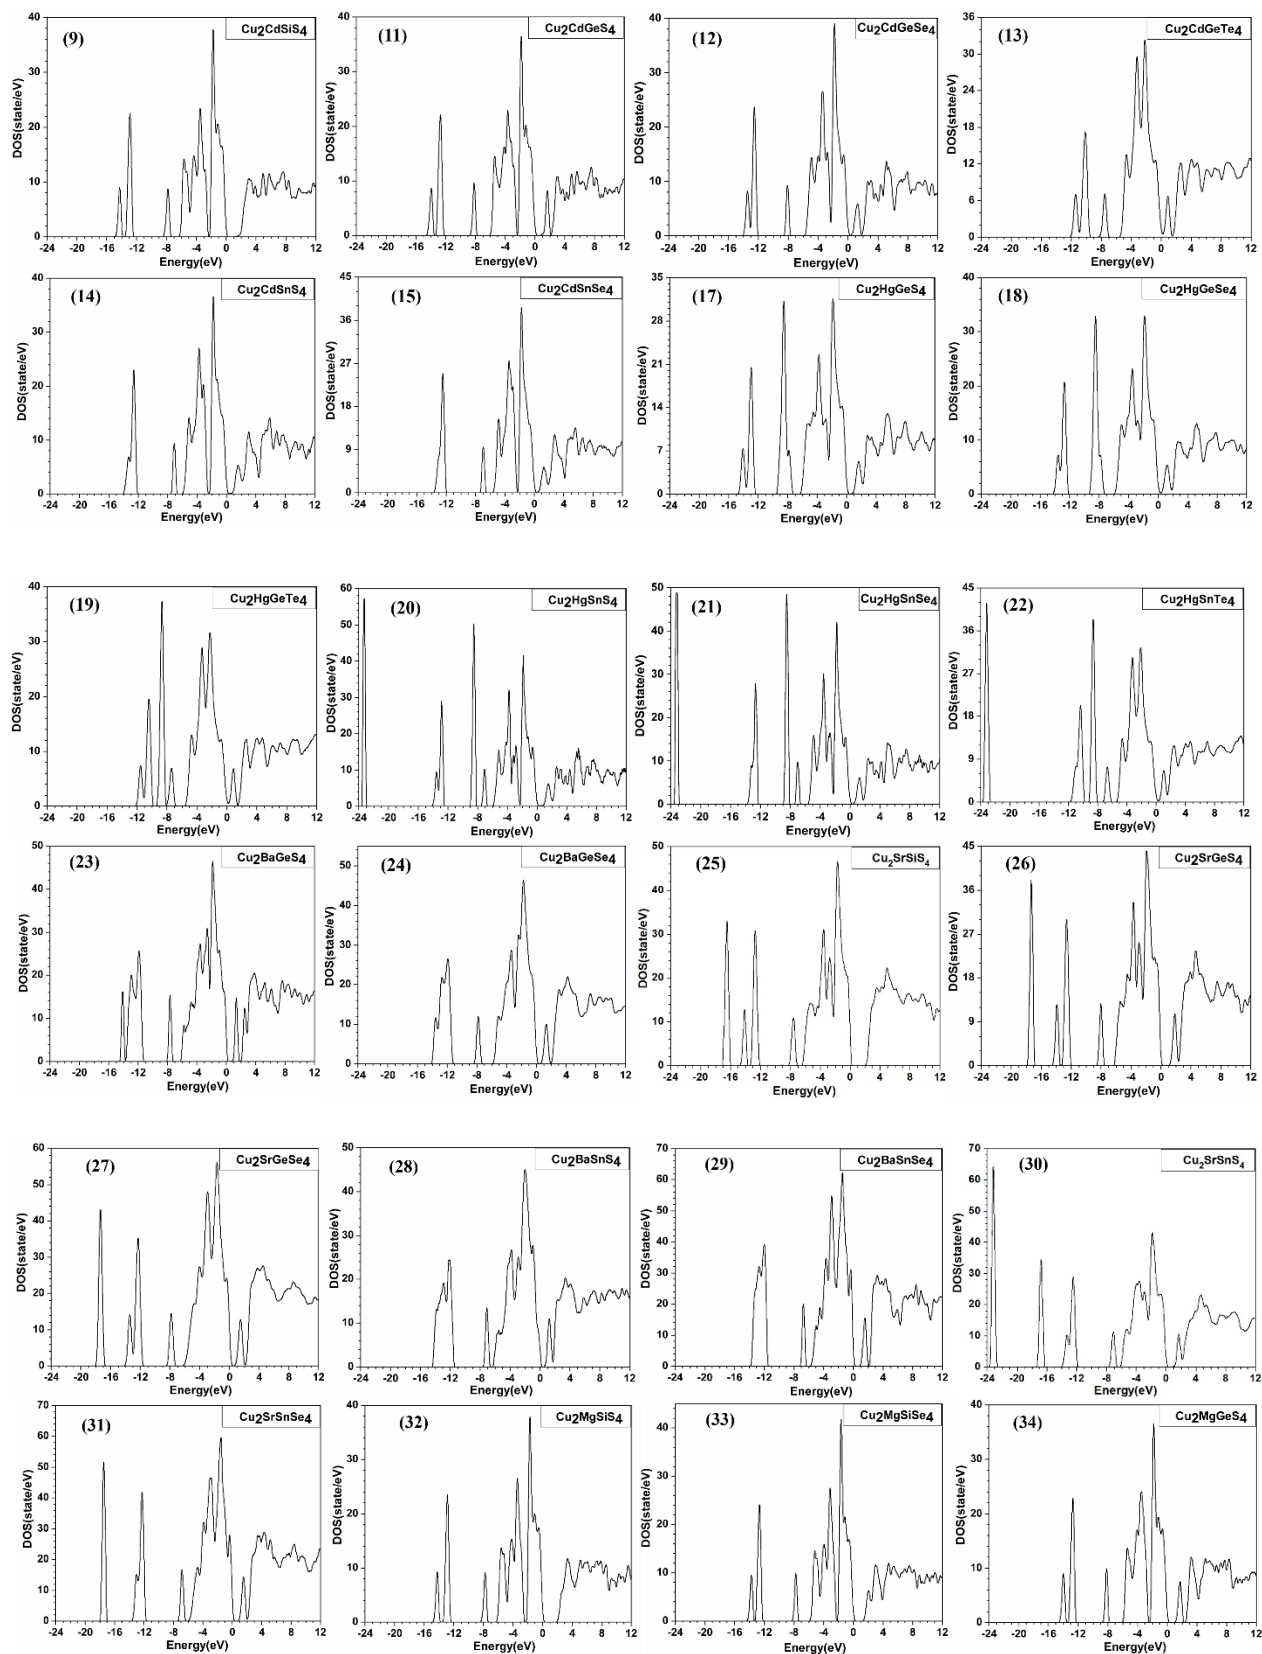

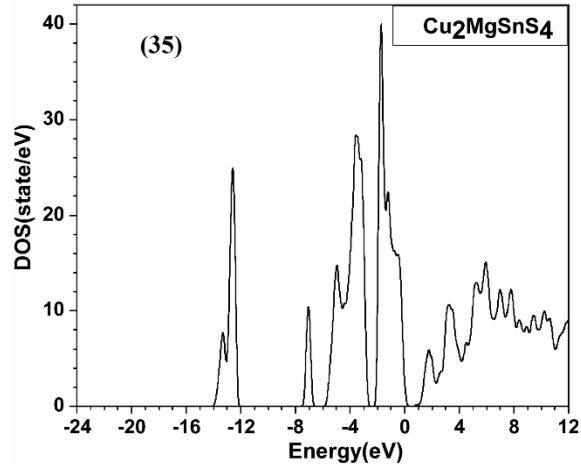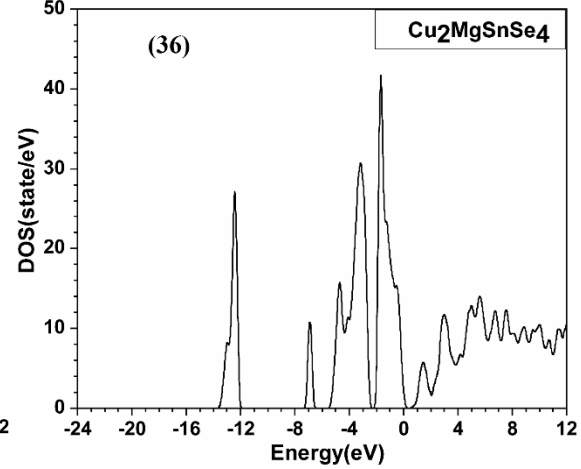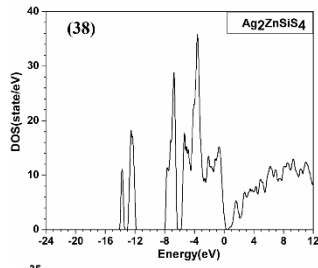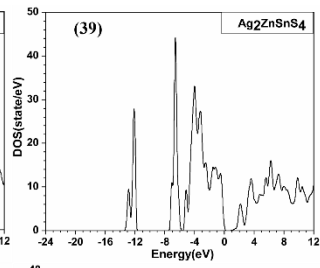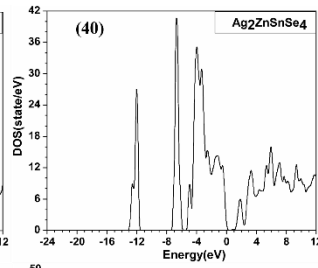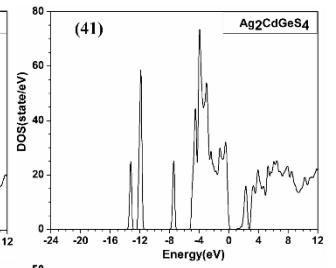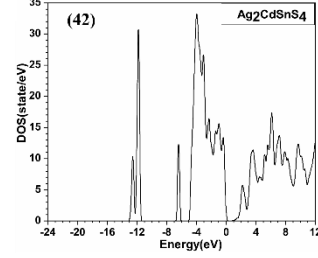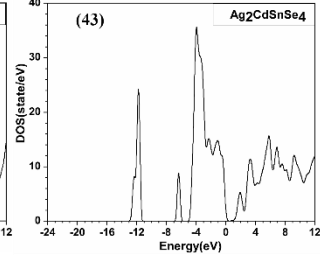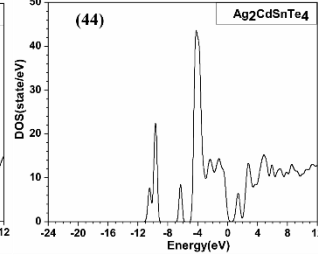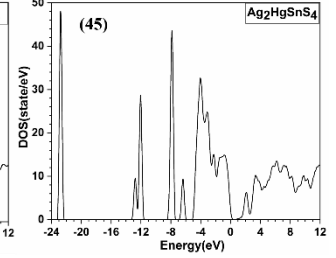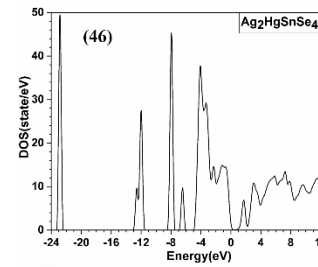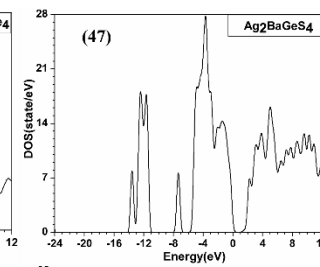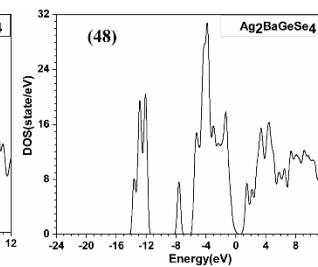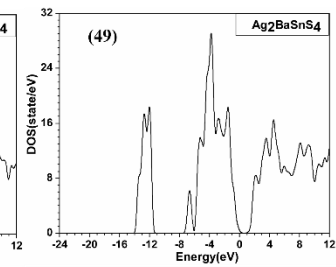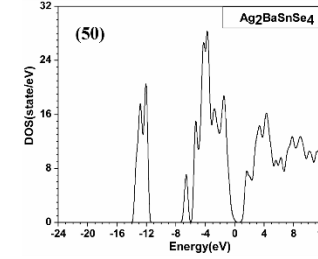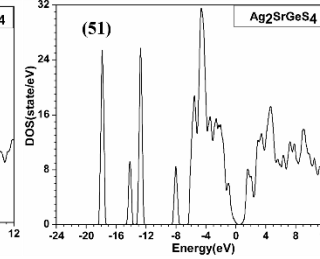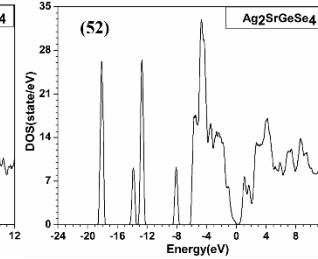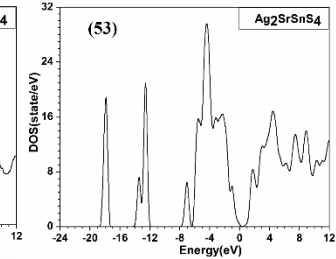

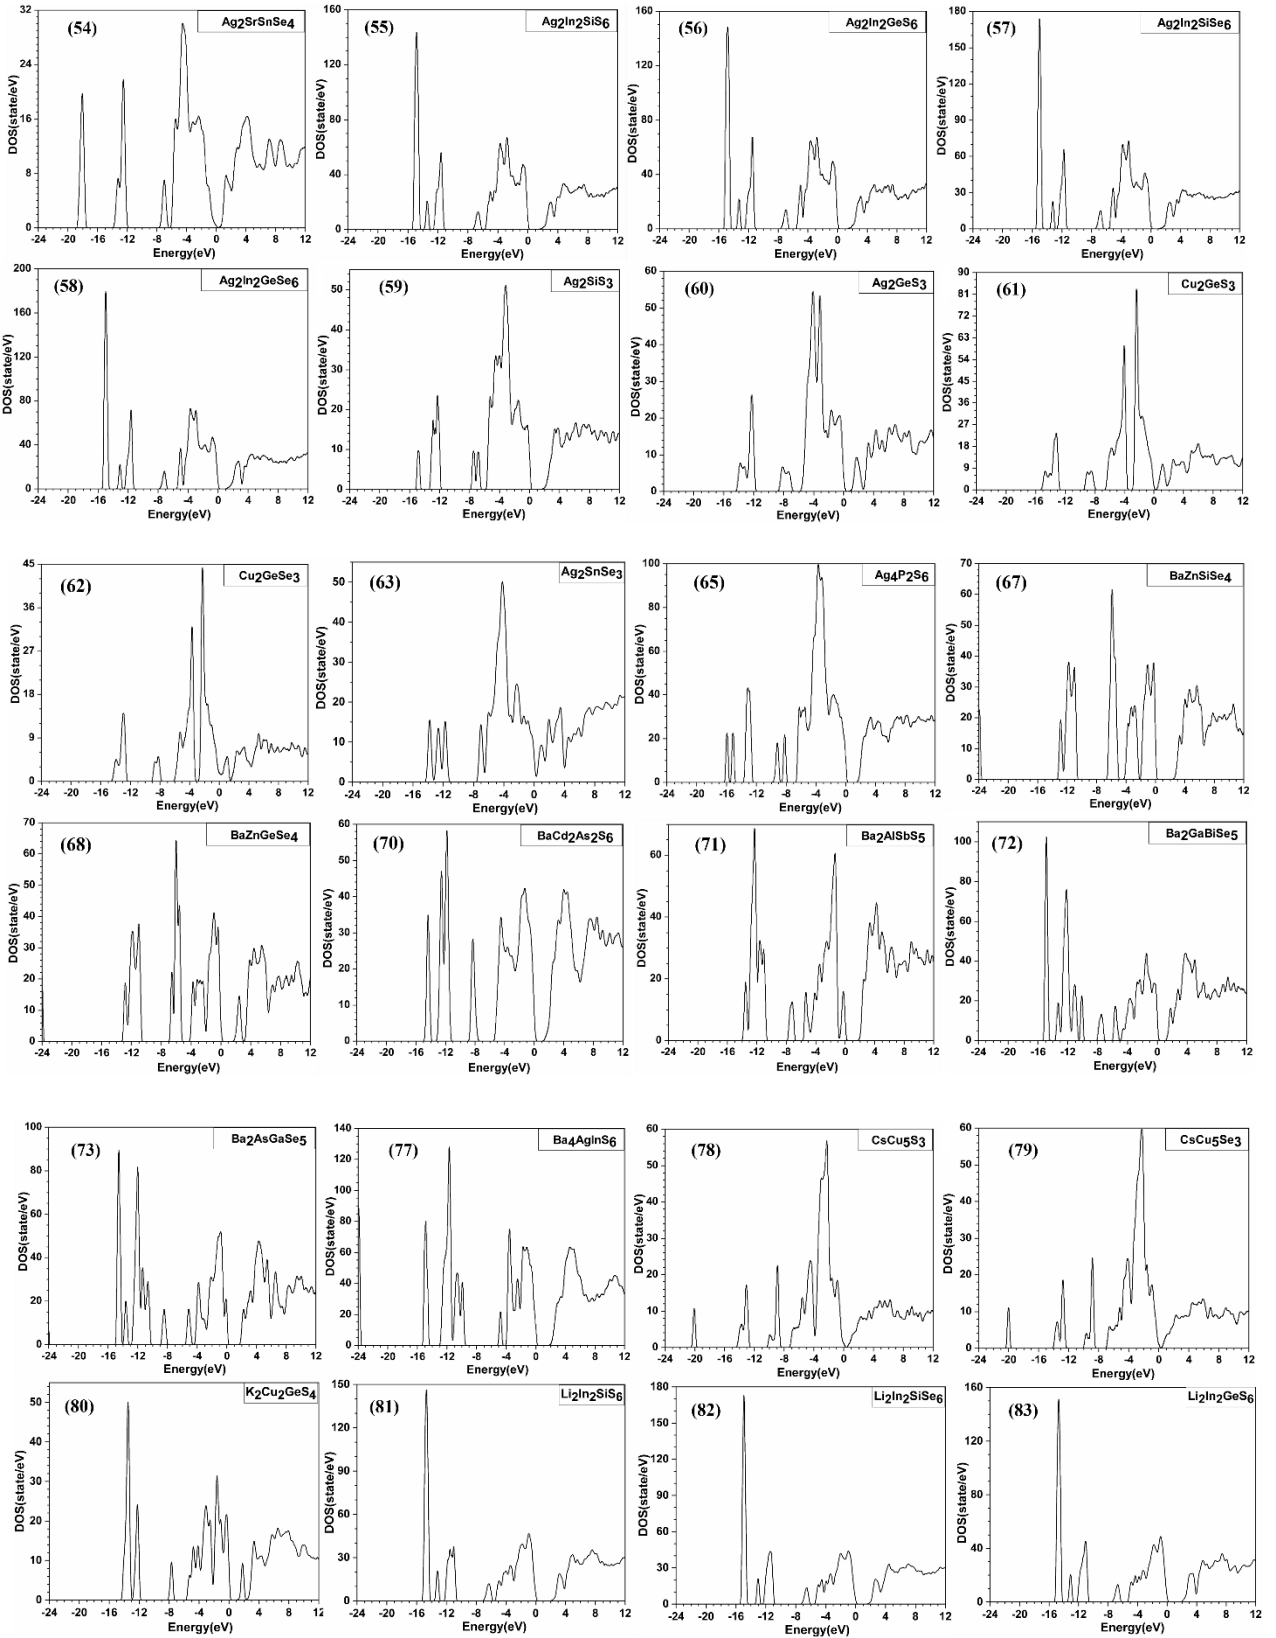

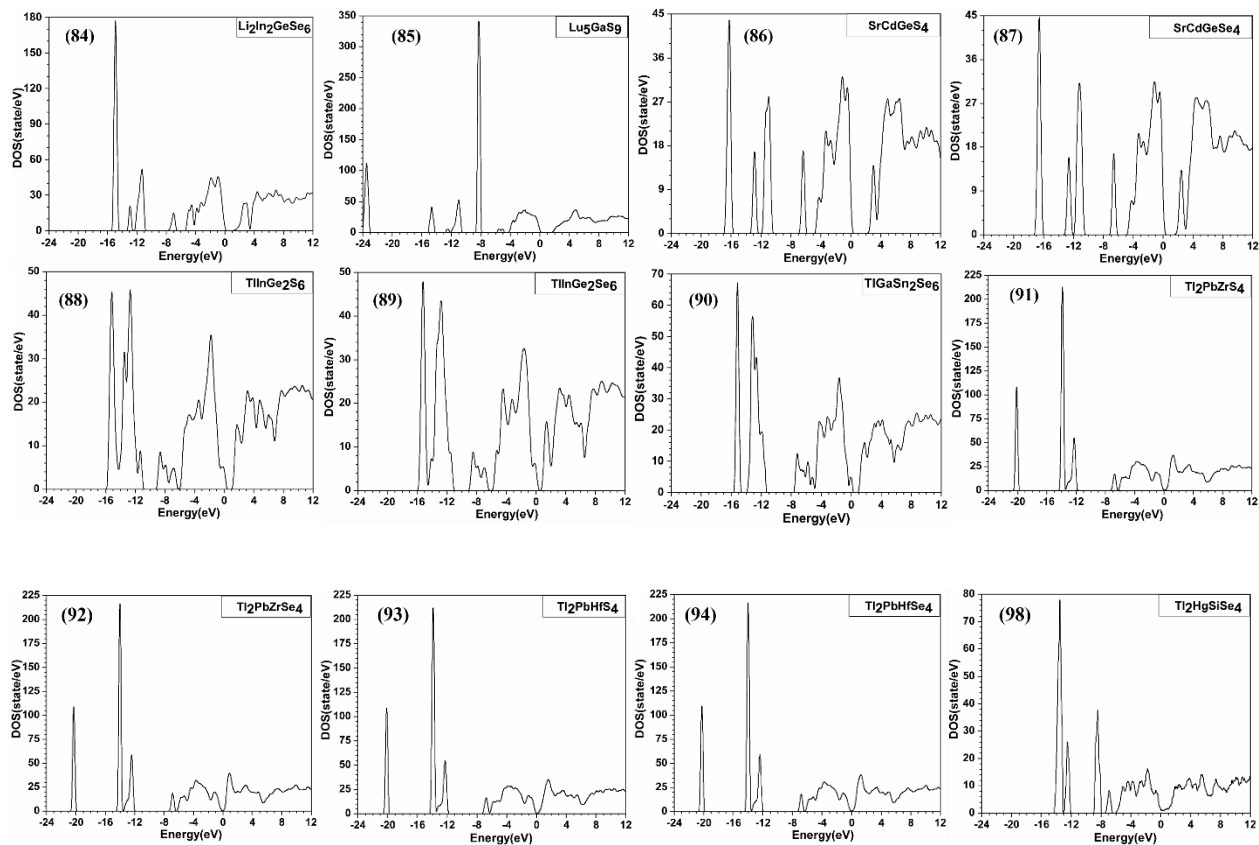

**Fig. S2. TDOS for the chalcogenide crystals.**



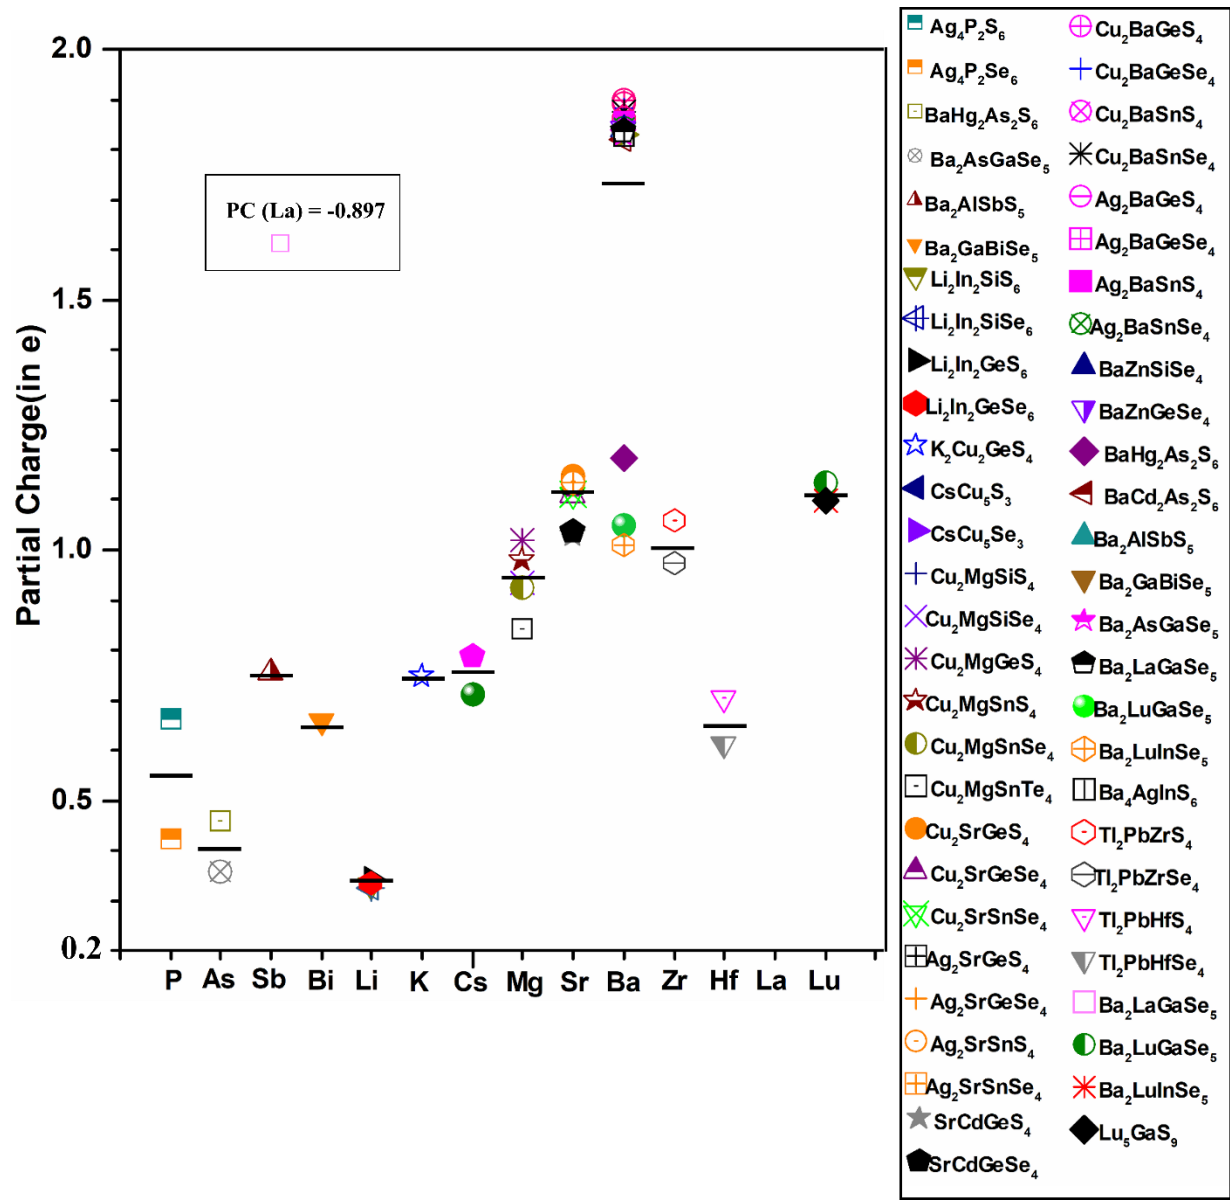

Fig. S4. Distribution of partial charge of the elements from P to Lu.

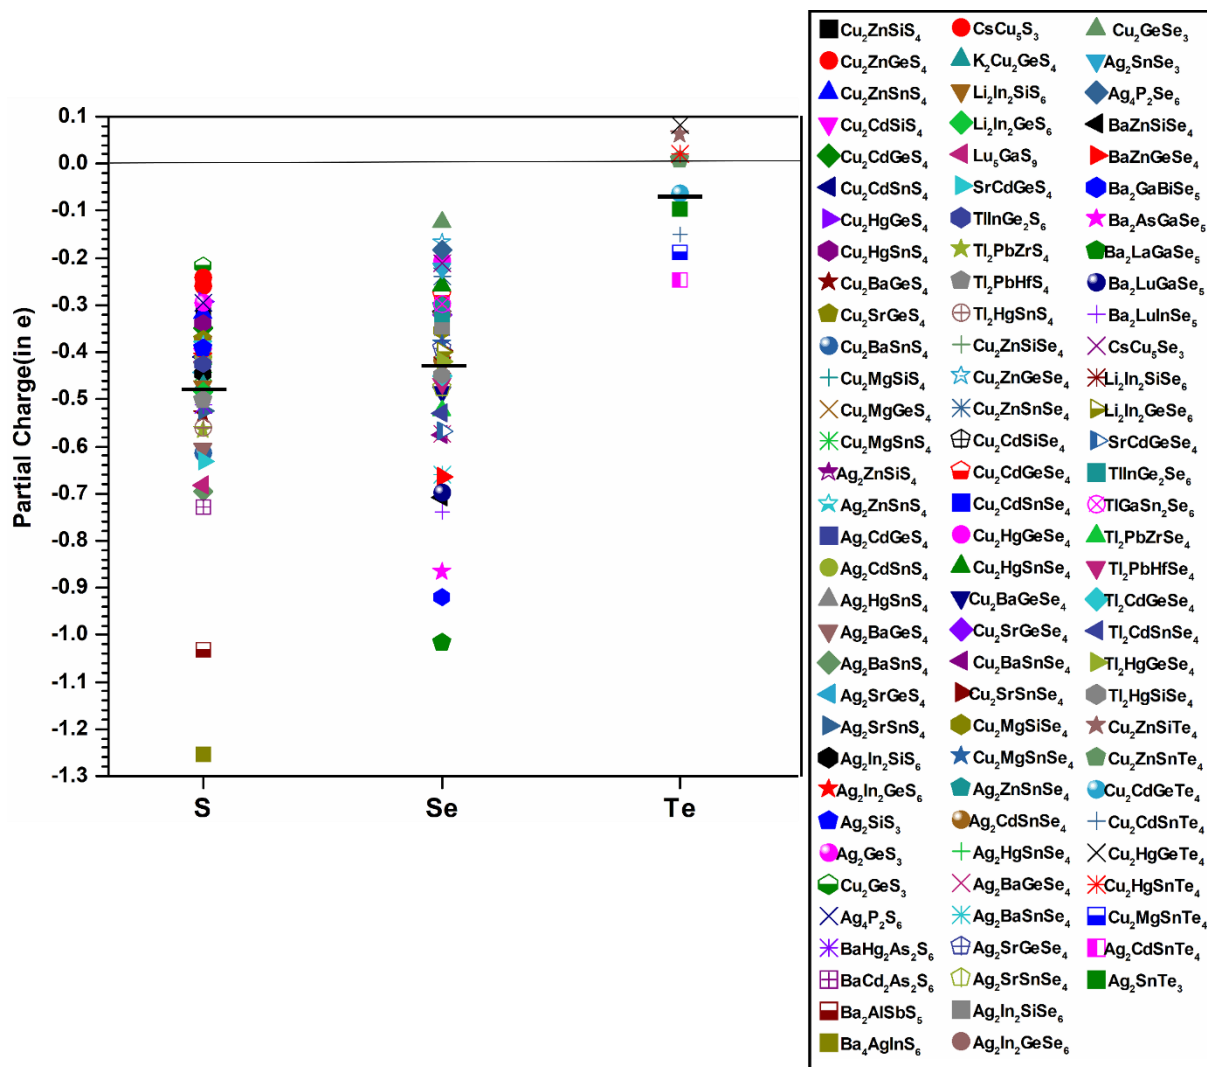

Fig. S5. Distribution of partial charge of the chalcogene elements(S, Se, Te).



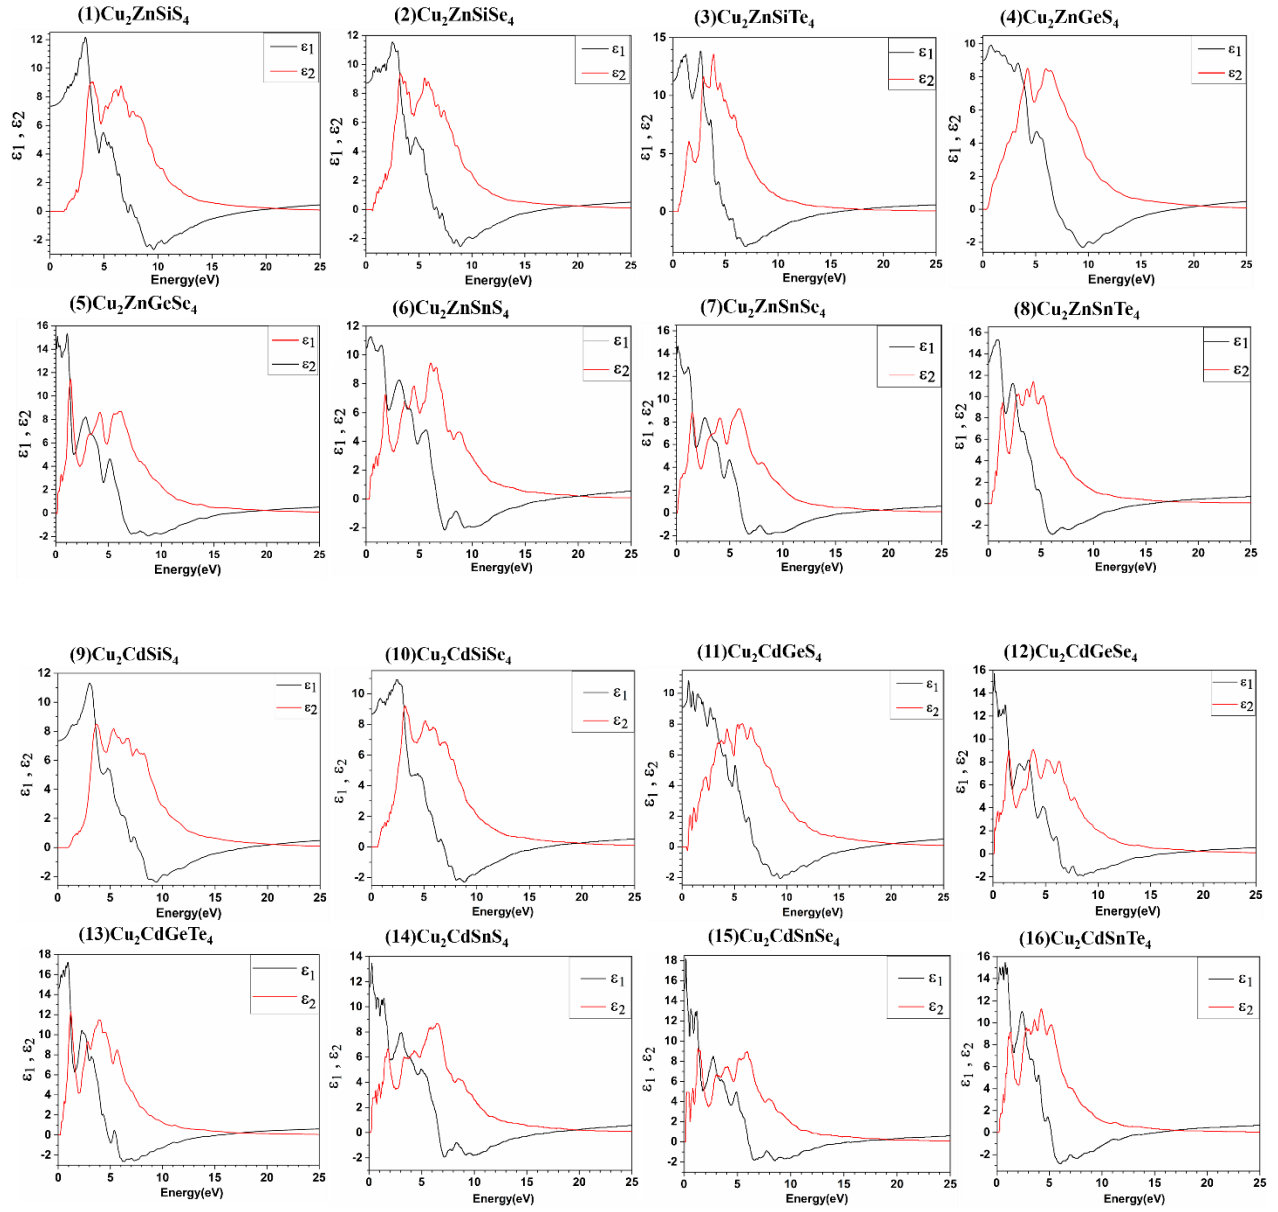

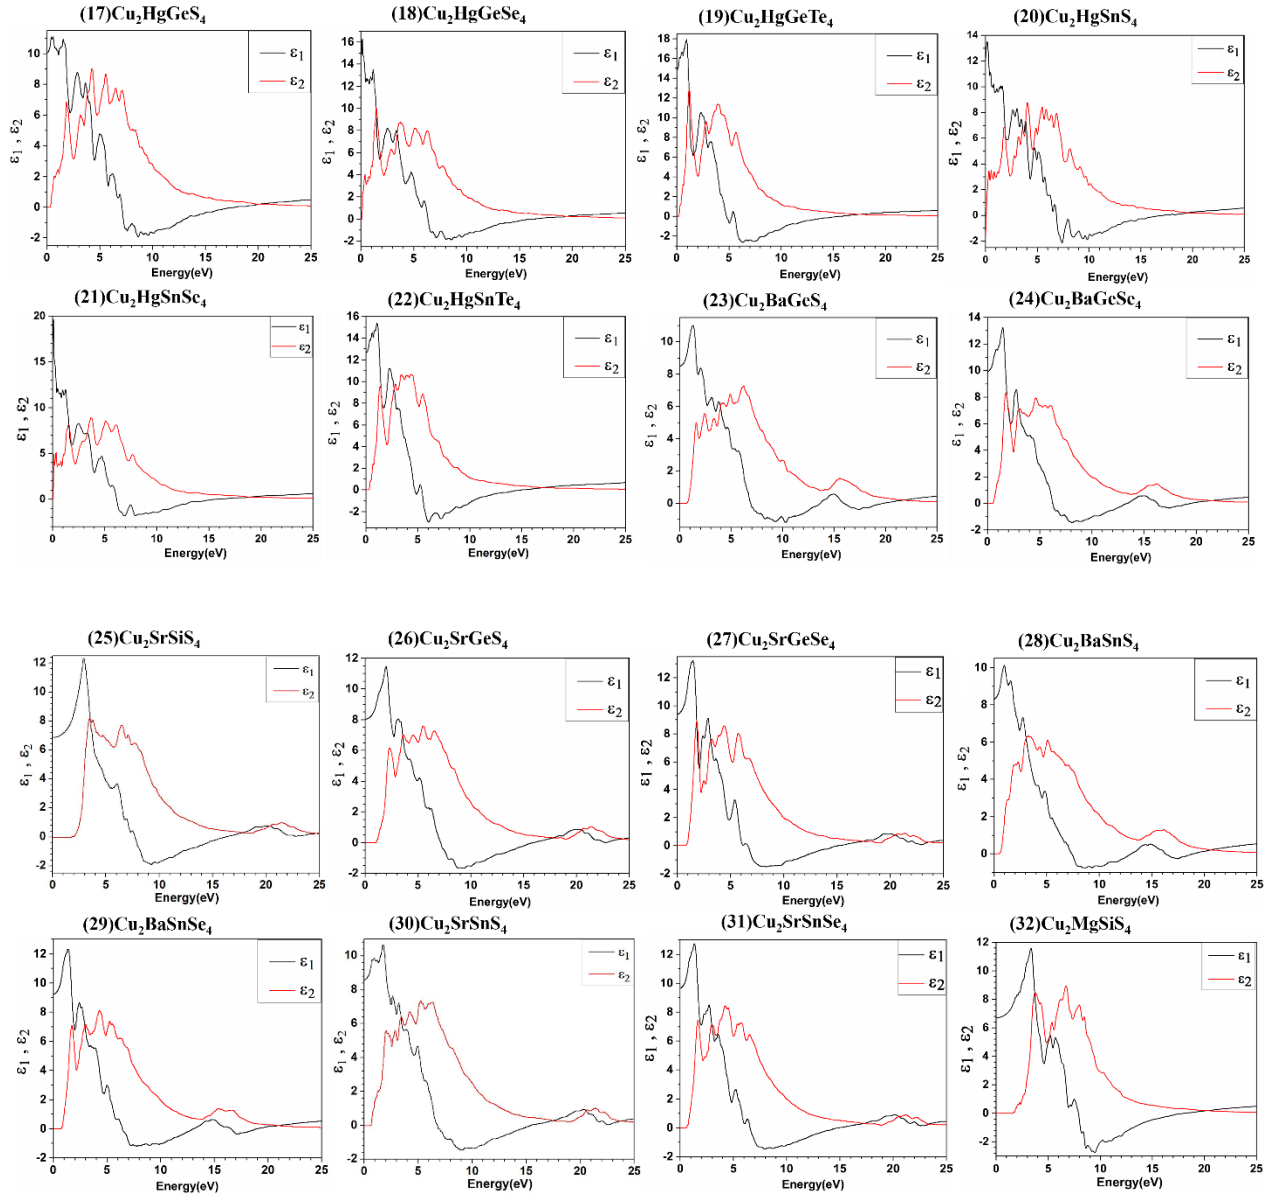

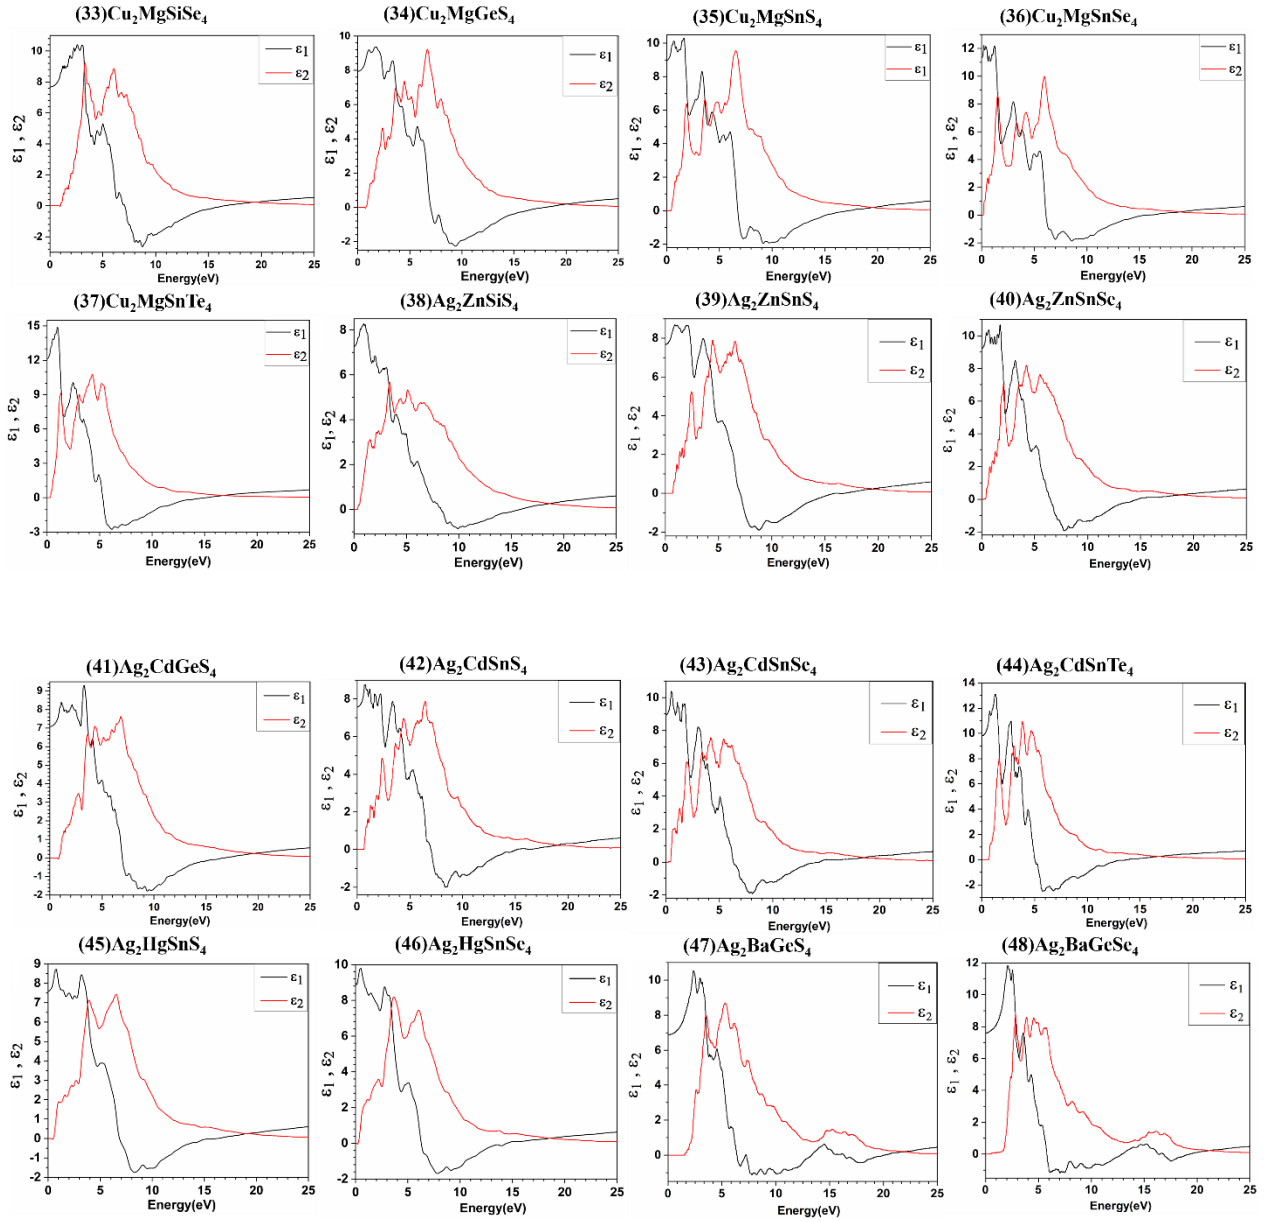

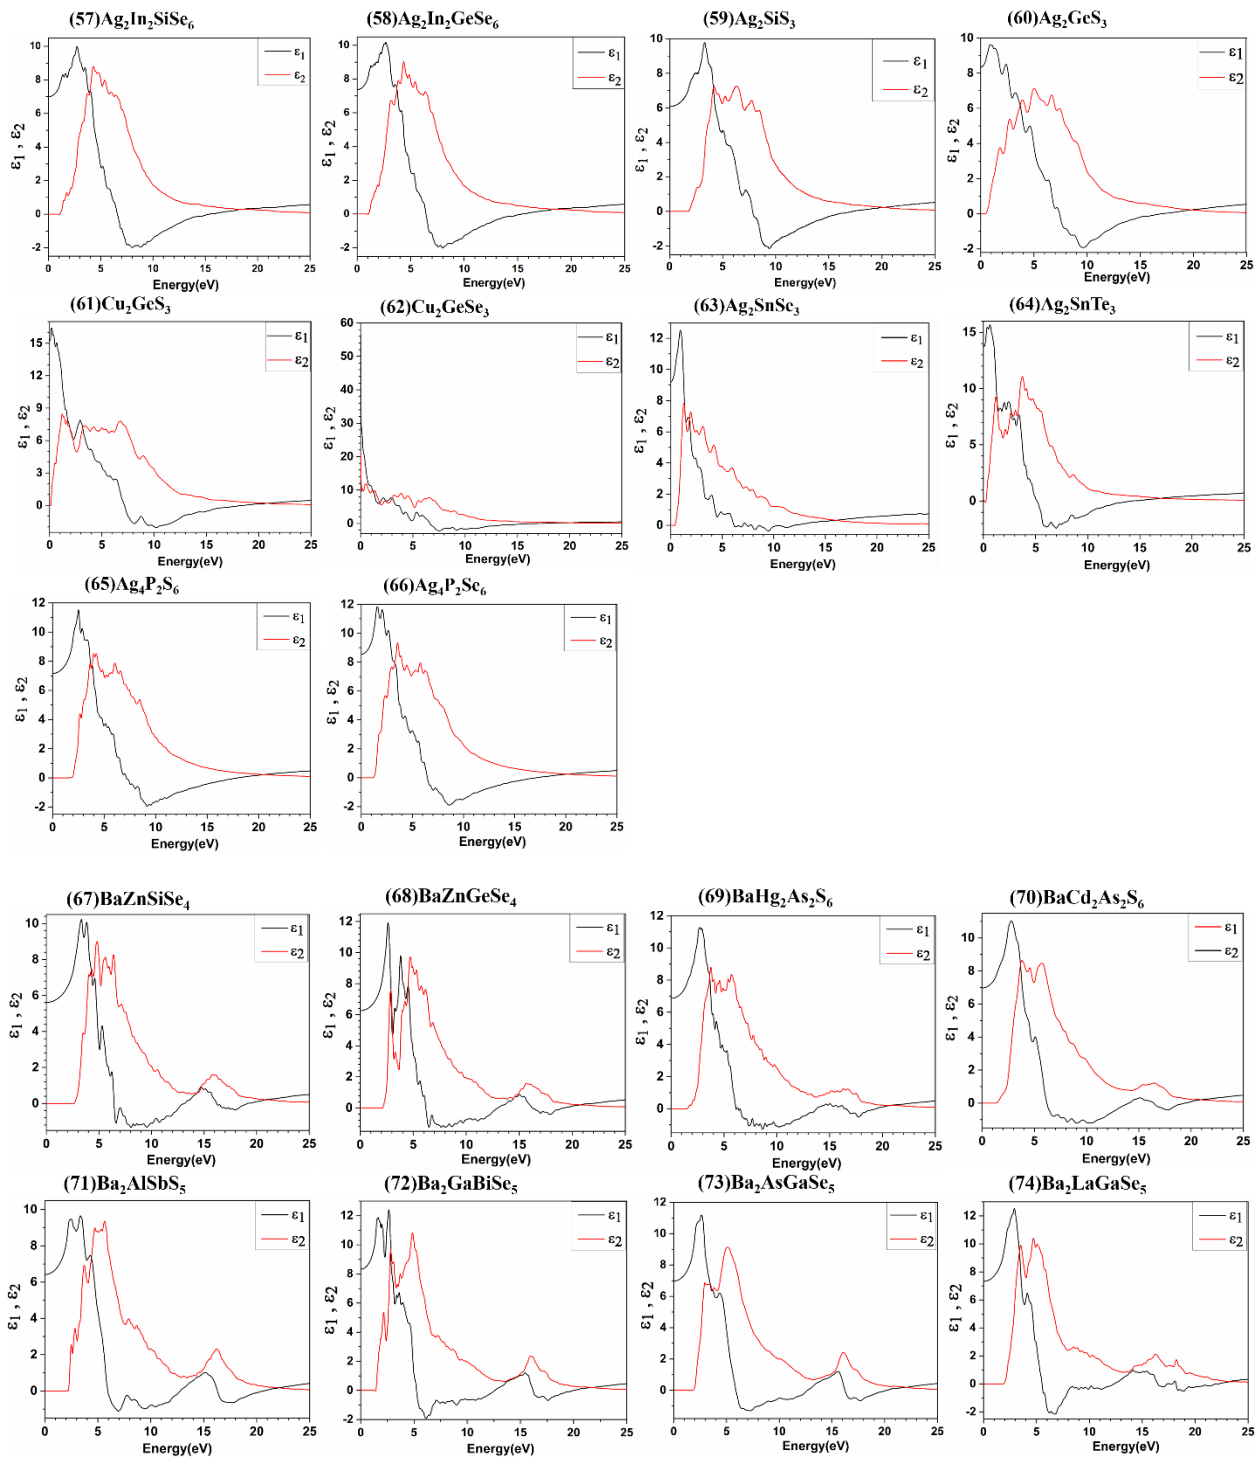

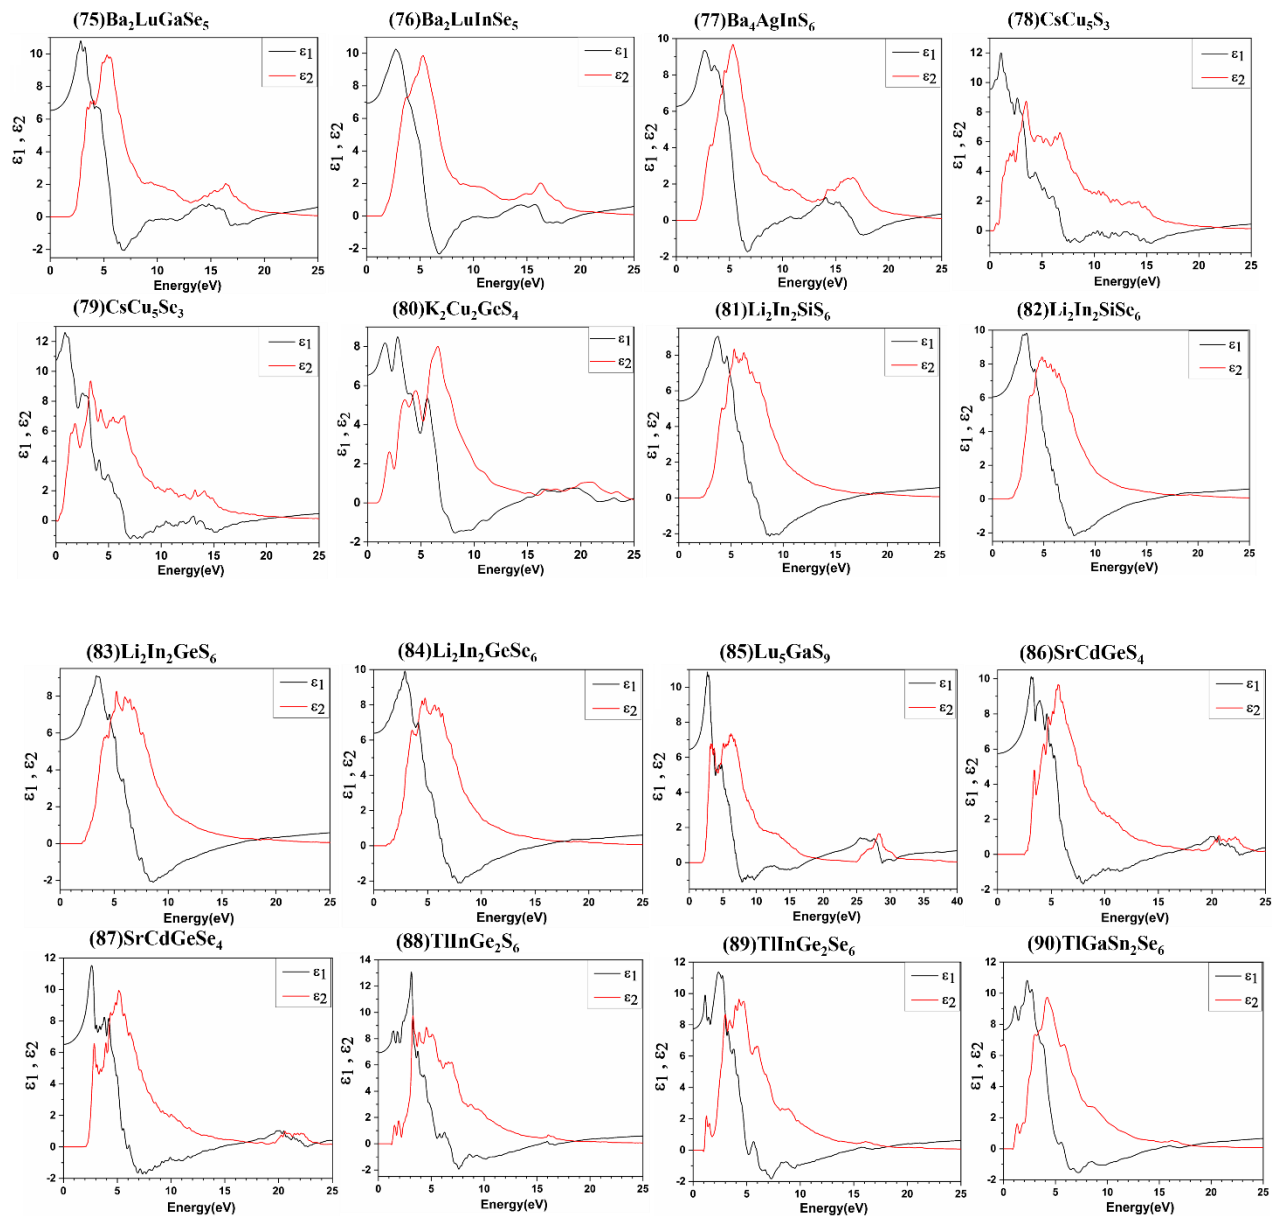

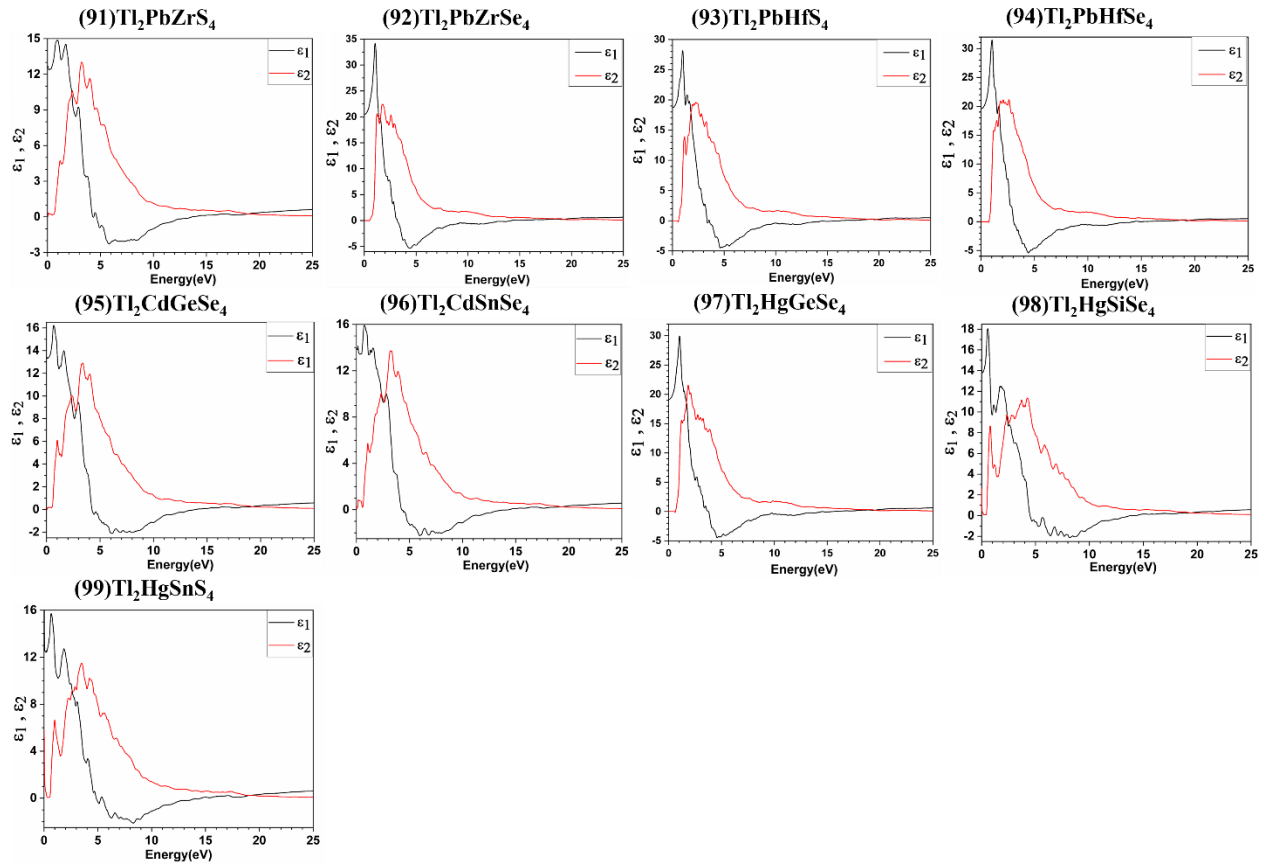

**Fig. S6.** Optical dielectric function for the chalcogenide crystals. The black curve for the real part ( $\epsilon_1$ ), the red curve for the imaginary part ( $\epsilon_2$ ).

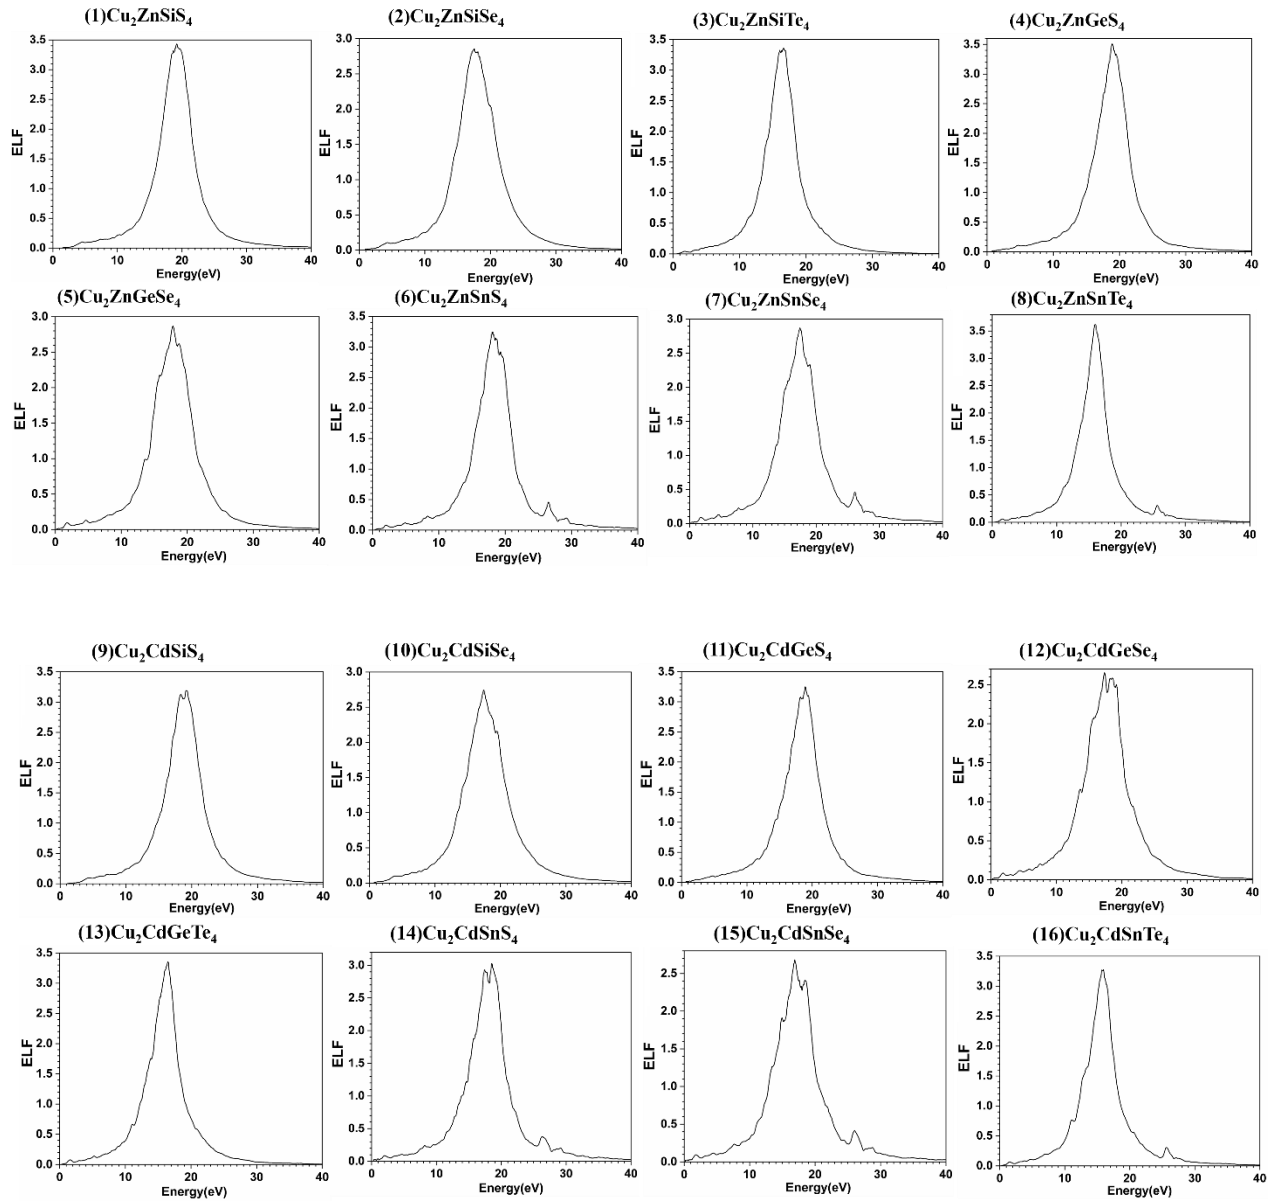

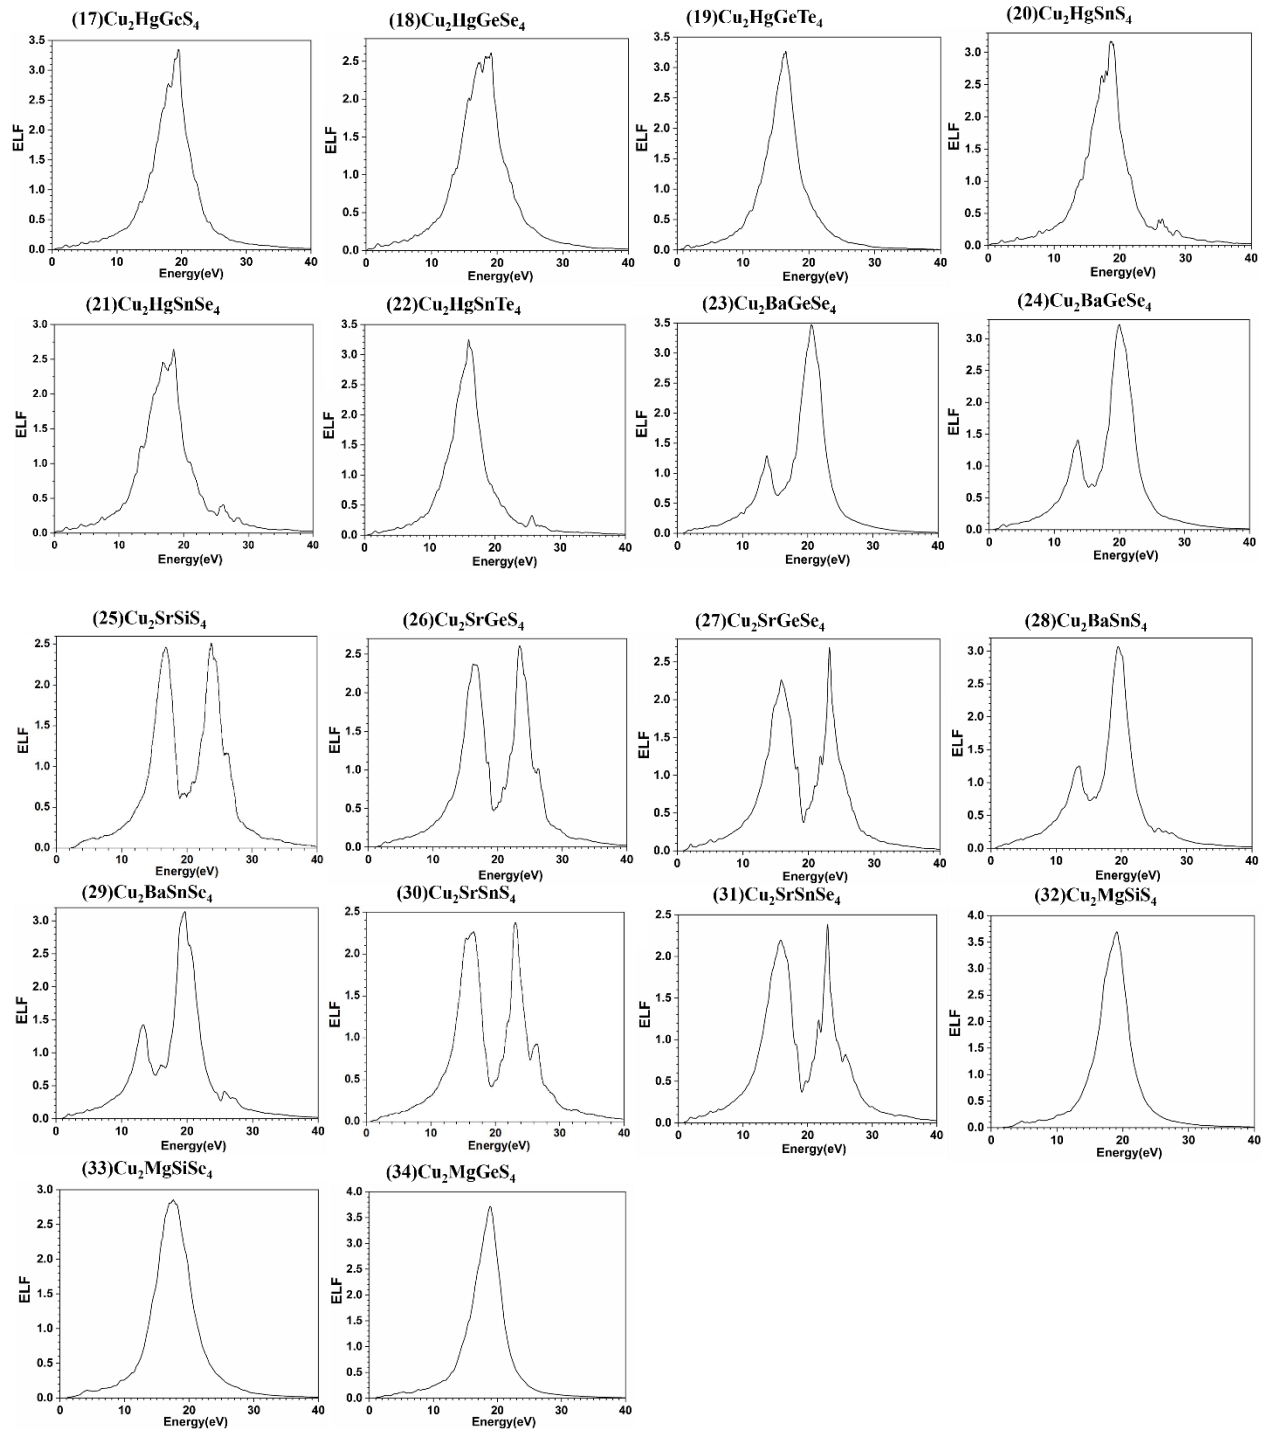



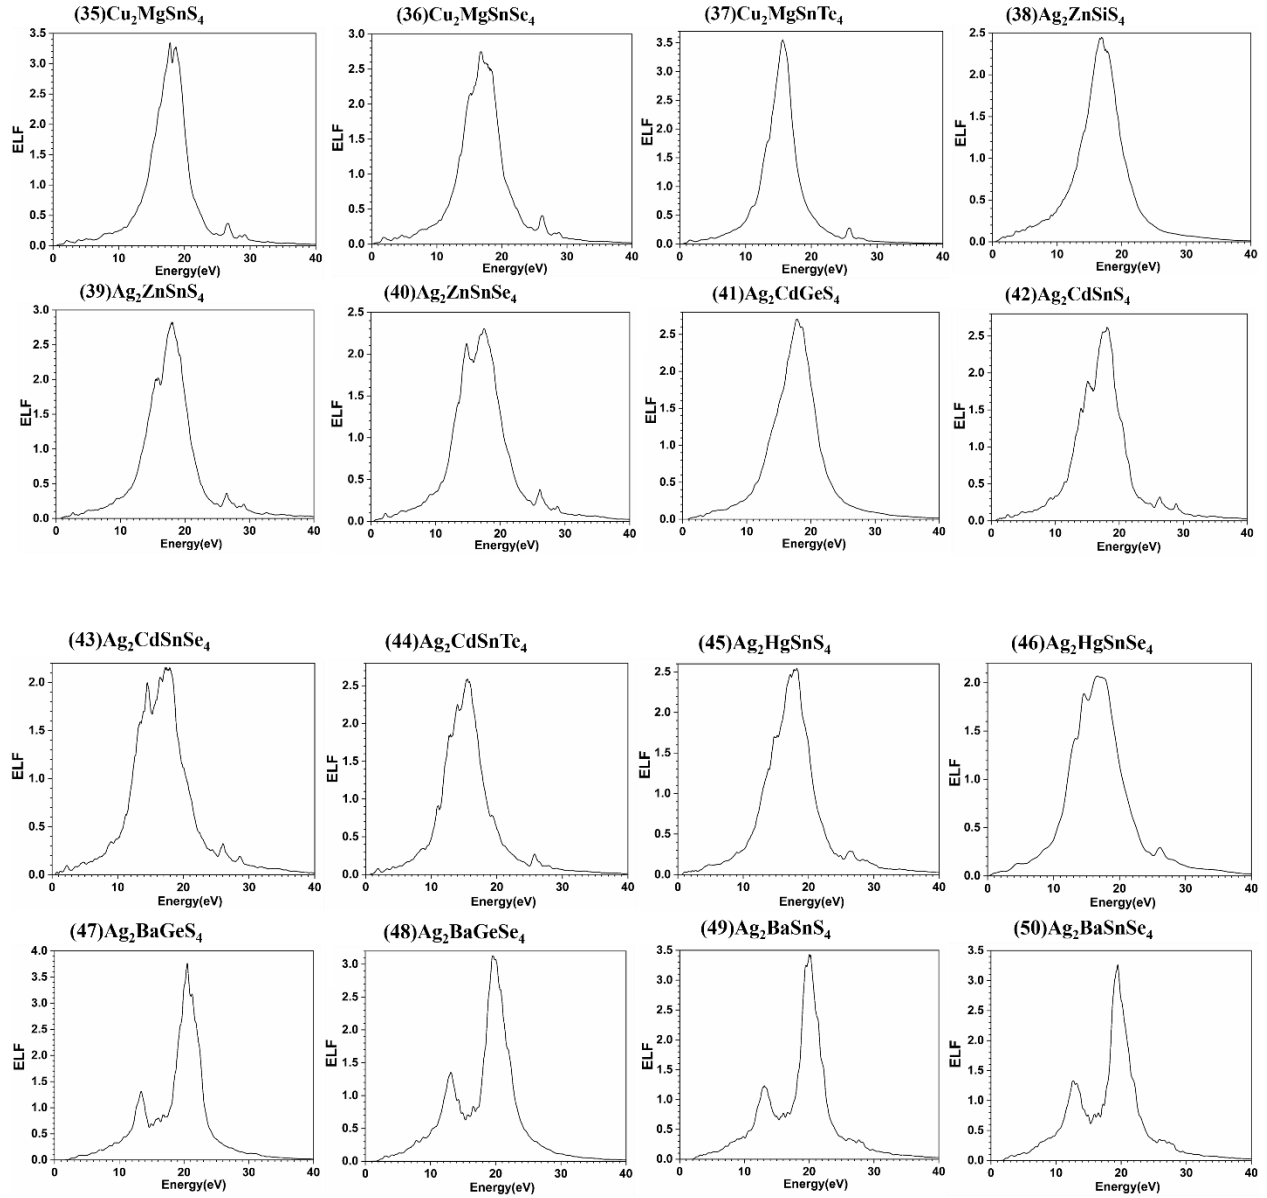

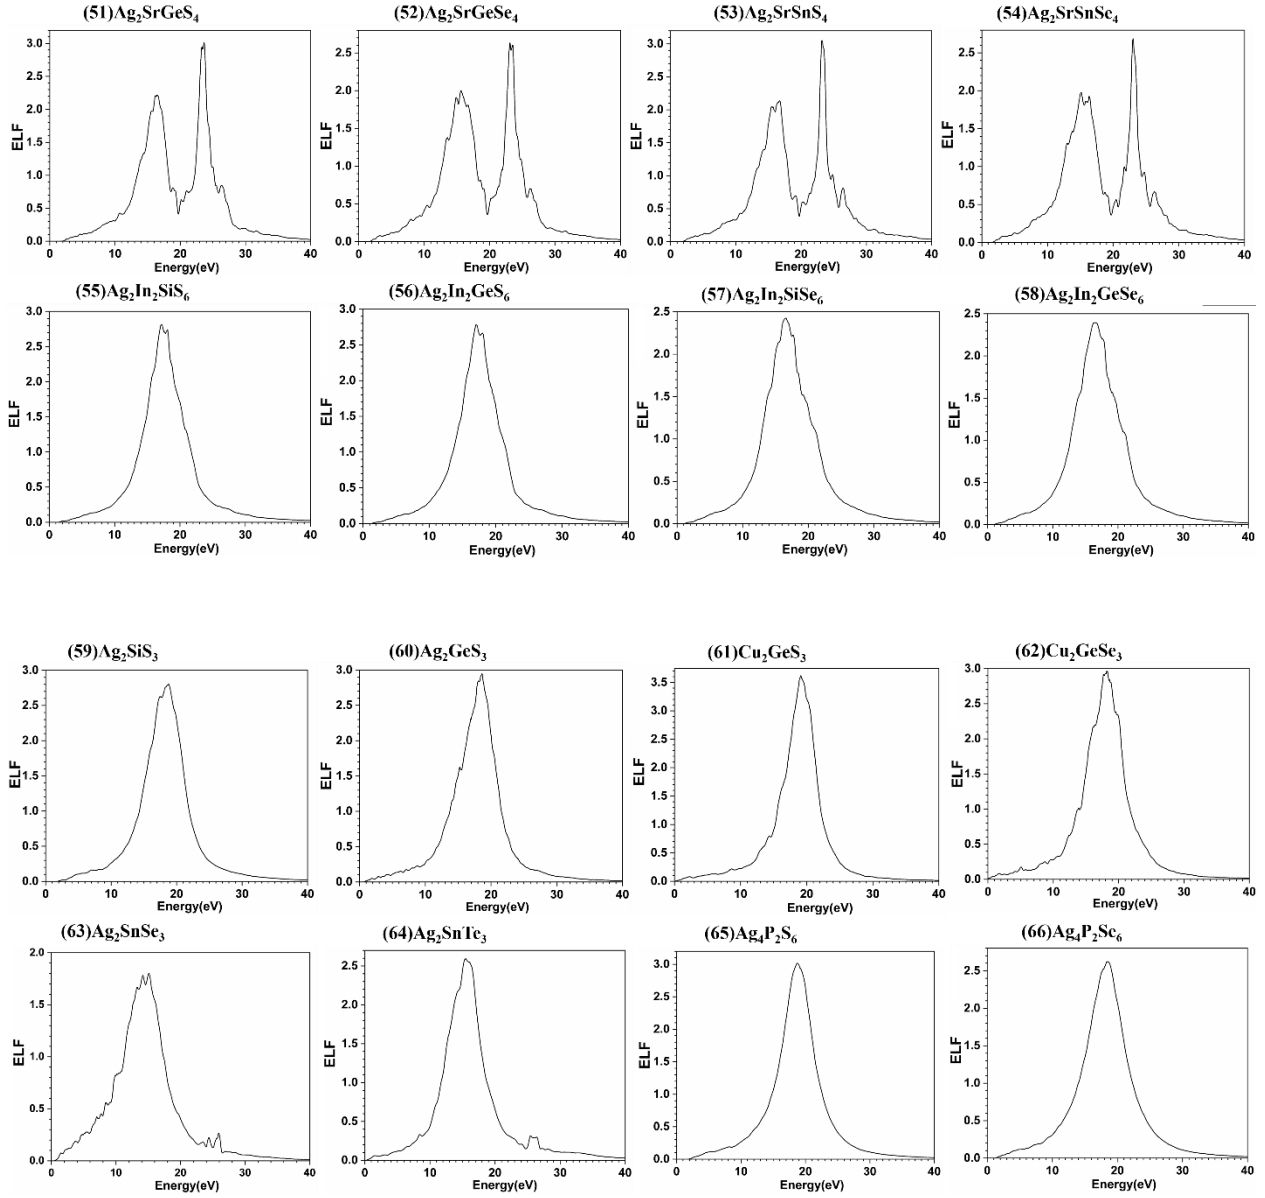

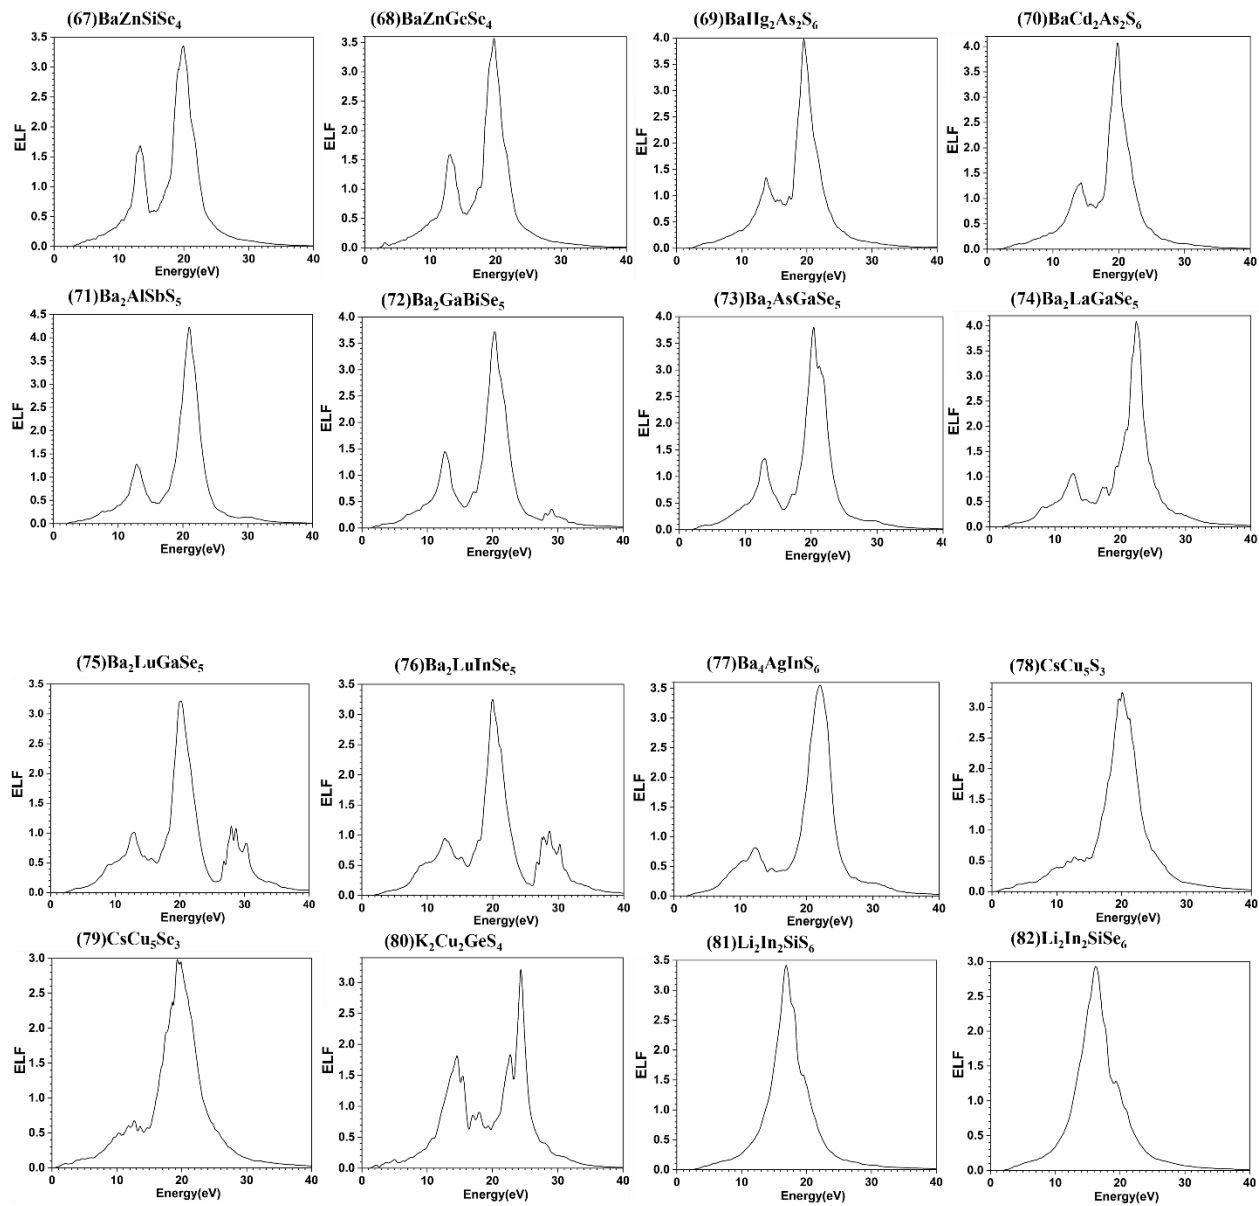

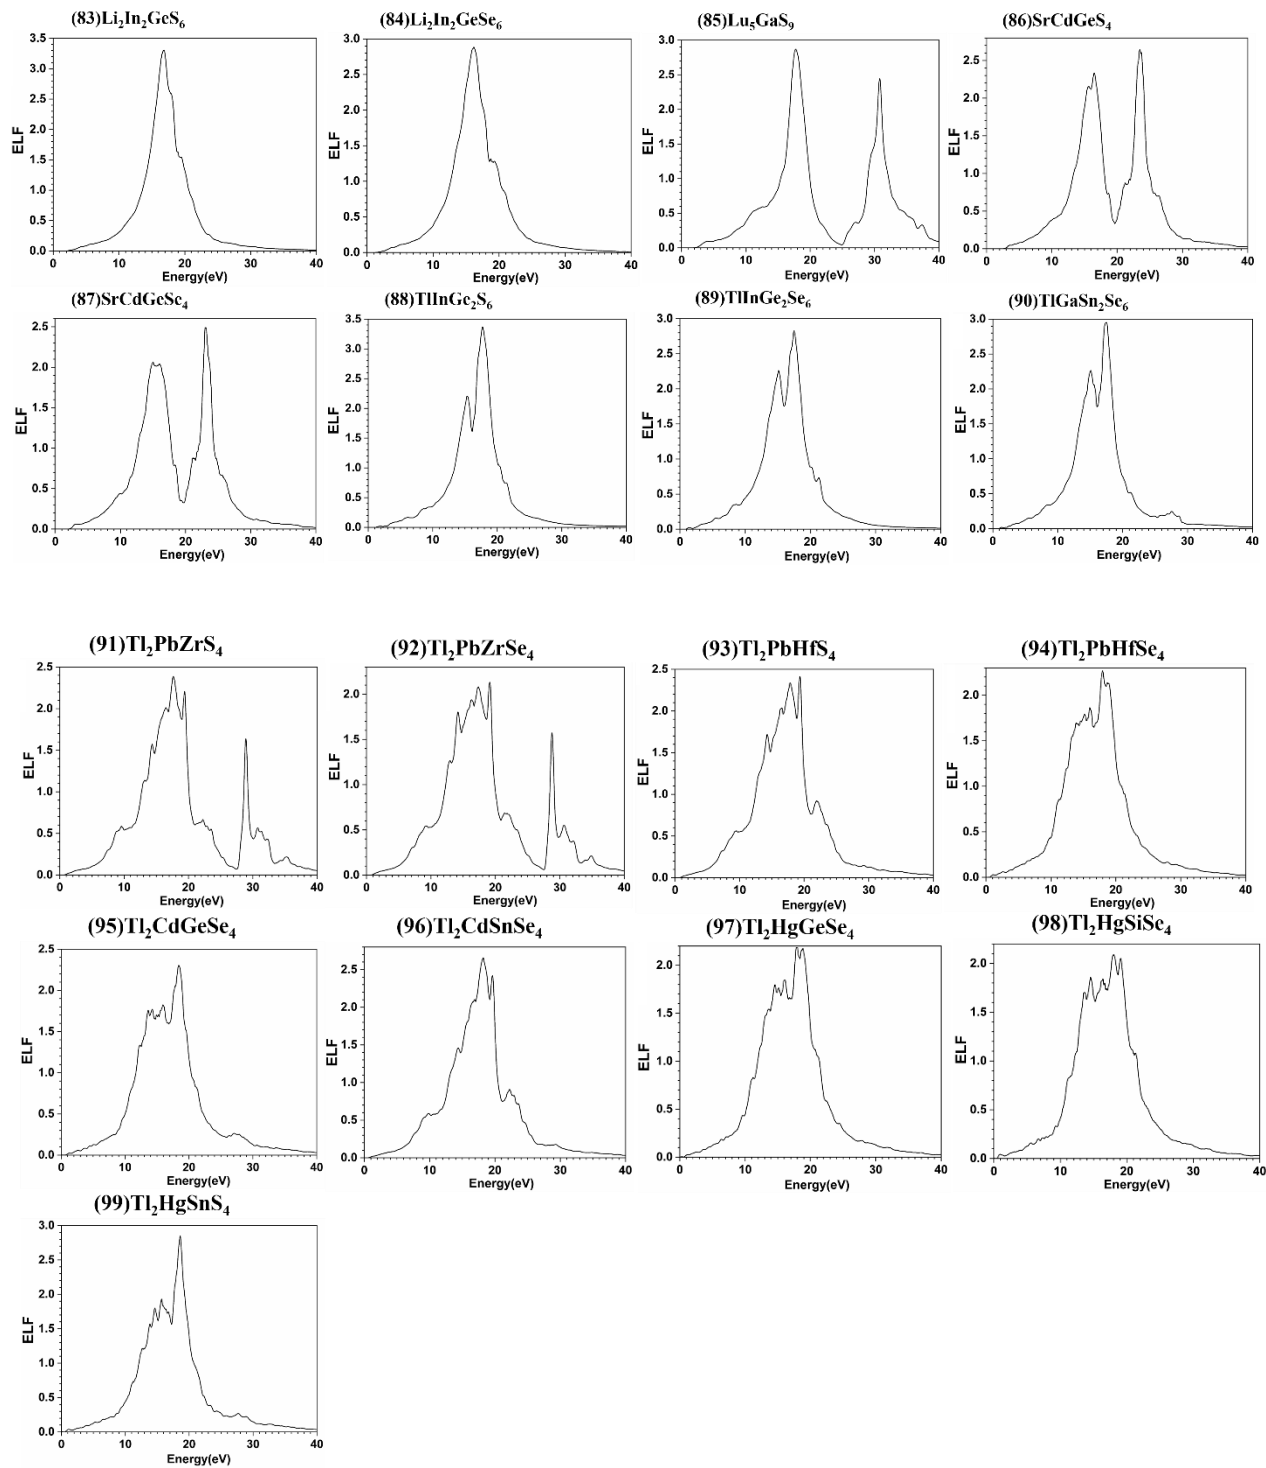

Fig. S7. The Optical Loss function for the chalcogenide crystals

## 5. References:

- [1] W.-Y. Ching, P. Rulis, *Electronic Structure Methods for Complex Materials: The orthogonalized linear combination of atomic orbitals*, Oxford University Press, 2012.
- [2] H. Yao, L. Ouyang, W.Y. Ching, Ab initio calculation of elastic constants of ceramic crystals, *Journal of the American Ceramic Society*, 90 (2007) 3194-3204.
- [3] A. Reuss, Berechnung der fließgrenze von mischkristallen auf grund der plastizitätsbedingung für einkristalle, *ZAMM-Journal of Applied Mathematics and Mechanics/Zeitschrift für Angewandte Mathematik und Mechanik*, 9 (1929) 49-58.
- [4] R. Hill, The elastic behaviour of a crystalline aggregate, *Proceedings of the Physical Society. Section A*, 65 (1952) 349.
- [5] Y. Gao, Y. Dong, Structural, mechanical and thermal properties of Cu<sub>2</sub>ZnSiS<sub>4</sub> with four structures from the first-principle calculations, *International Journal of Modern Physics B*, 33 (2019) 1950067.
- [6] A. Litvinchuk, V. Dzhagan, V. Yukhymchuk, M.Y. Valakh, O. Parasyuk, L. Piskach, X. Wang, A. Jacobson, D. Zahn, Crystal structure and vibrational properties of Cu<sub>2</sub>ZnSiSe<sub>4</sub> quaternary semiconductor, *physica status solidi (b)*, 253 (2016) 1808-1815.
- [7] S. Levchenko, A. Nateprov, V. Kravtsov, M. Guc, A. Pérez-Rodríguez, V. Izquierdo-Roca, X. Fontané, E. Arushanov, Structural study and Raman scattering analysis of Cu<sub>2</sub>ZnSiTe<sub>4</sub> bulk crystals, *Optics express*, 22 (2014) A1936-A1943.
- [8] M. Guc, A. Litvinchuk, S. Levchenko, V. Izquierdo-Roca, X. Fontané, M.Y. Valakh, E. Arushanov, A. Pérez-Rodríguez, Optical phonons in the wurtzstannite Cu<sub>2</sub>ZnGeS<sub>4</sub> semiconductor: Polarized Raman spectroscopy and first-principle calculations, *Physical Review B*, 89 (2014) 205205.
- [9] O. Khyzhun, V. Bekenev, V. Ocheretova, A. Fedorchuk, O. Parasyuk, Electronic structure of Cu<sub>2</sub>ZnGeSe<sub>4</sub> single crystal: Ab initio FP-LAPW calculations and X-ray spectroscopy measurements, *Physica B: Condensed Matter*, 461 (2015) 75-84.
- [10] L. Kong, J.X. Deng, First-Principles Study on Electronic and Optical Properties of Kesterite and Stannite Cu<sub>2</sub>ZnSnS<sub>4</sub> Photovoltaic Absorbers, in: *Materials Science Forum*, Trans Tech Publ, 2015, pp. 80-88.
- [11] W. Gong, T. Tabata, K. Takei, M. Morihama, T. Maeda, T. Wada, Crystallographic and optical properties of (Cu, Ag) <sub>2</sub>ZnSnS<sub>4</sub> and (Cu, Ag) <sub>2</sub>ZnSnSe<sub>4</sub> solid solutions, *physica status solidi (c)*, 12 (2015) 700-703.
- [12] N. Ullah, G. Murtaza, M. Iqbal, A. Mahmood, R. Khenata, Computational study of Cu<sub>2</sub>ZnSn(X<sub>1-x</sub>Te<sub>x</sub>)<sub>4</sub> (X= S, Se) for optoelectronic applications, *International Journal of Modern Physics B*, 30 (2016) 1650137.
- [13] G. Chapuis, A. Niggli, The crystal structure of the normal tetrahedral compound Cu<sub>2</sub>CdSiS<sub>4</sub>, *Acta Crystallographica Section B: Structural Crystallography and Crystal Chemistry*, 28 (1972) 1626-1628.
- [14] H. Matsushita, T. Ichikawa, A. Katsui, Structural, thermodynamical and optical properties of Cu<sub>2</sub>II-IV-VI<sub>4</sub> quaternary compounds, *Journal of materials science*, 40 (2005) 2003-2005.
- [15] E. Parthé, K. Yvon, R. Deitch, The crystal structure of Cu<sub>2</sub>CdGeS<sub>4</sub> and other quaternary normal tetrahedral structure compounds, *Acta Crystallographica Section B: Structural Crystallography and Crystal Chemistry*, 25 (1969) 1164-1174.
- [16] M. Brik, O. Parasyuk, G. Myronchuk, I. Kityk, Specific features of band structure and optical anisotropy of Cu<sub>2</sub>CdGeSe<sub>4</sub> quaternary compounds, *Materials Chemistry and Physics*, 147 (2014) 155-161.
- [17] H. Haeuseler, F. Ohrendorf, M. Himmrich, Zur Kenntnis quaternärer Telluride Cu<sub>2</sub>MM'Te<sub>4</sub> mit Tetraederstrukturen/Quaternary Tellurides Cu<sub>2</sub>MM'Te<sub>4</sub> with Tetrahedral Structures, *Zeitschrift für Naturforschung B*, 46 (1991) 1049-1052.

- [18] S. Hussain, G. Murtaza, S.H. Khan, A. Khan, M.A. Ali, M. Faizan, A. Mahmood, R. Khenata, First principles study of structural, optoelectronic and thermoelectric properties of  $\text{Cu}_2\text{CdSnX}_4$  (X= S, Se, Te) chalcogenides, *Materials Research Bulletin*, 79 (2016) 73-83.
- [19] T.V. Vu, A. Lavrentyev, B. Gabrelian, V. Tkach, K.D. Pham, O. Marchuk, O. Parasyuk, O. Khyzhun, First-principles DFT computation and X-ray spectroscopy study of the electronic band structure and optical constants of  $\text{Cu}_2\text{HgGeS}_4$ , *Solid State Sciences*, (2020) 106287.
- [20] B. Gabrelian, A. Lavrentyev, T.V. Vu, V. Tkach, O. Marchuk, K. Kalmykova, L. Ananchenko, O. Parasyuk, O. Khyzhun, Quaternary  $\text{Cu}_2\text{HgGeSe}_4$  selenide: Its electronic and optical properties as elucidated from TB-mBJ band-structure calculations and XPS and XES measurements, *Chemical Physics*, (2020) 110821.
- [21] B. Gabrelian, A. Lavrentyev, T.V. Vu, K. Kalmykova, L. Ananchenko, V. Tkach, O. Parasyuk, O. Khyzhun, Valence-band electronic structure and main optical properties of  $\text{Cu}_2\text{HgGeTe}_4$ : Theoretical simulation within a DFT framework and experimental XPS study, *Materials Today Communications*, 23 (2020) 100828.
- [22] T.V. Vu, A. Lavrentyev, B. Gabrelian, H.D. Tong, V. Tkach, O. Parasyuk, O. Khyzhun, A theoretical and experimental study of the valence-band electronic structure and optical constants of quaternary copper mercury tin sulfide,  $\text{Cu}_2\text{HgSnS}_4$ , a potential material for optoelectronics and solar cells, *Optical Materials*, 96 (2019) 109296.
- [23] T.V. Vu, A. Lavrentyev, B. Gabrelian, H.D. Tong, V. Tkach, O. Parasyuk, O. Khyzhun, Simulation within a DFT framework and experimental study of the valence-band electronic structure and optical properties of quaternary selenide  $\text{Cu}_2\text{HgSnSe}_4$ , *Optik*, 202 (2020) 163709.
- [24] J. Navrátil, V. Kucek, T. Plecháček, E. Černošková, F. Laufek, Č. Drašar, P. Knotek, Thermoelectric Properties of  $\text{Cu}_2\text{HgSnSe}_4$ - $\text{Cu}_2\text{HgSnTe}_4$  Solid Solution, *Journal of electronic materials*, 43 (2014) 3719-3725.
- [25] T. Zhu, W.P. Huhn, G.C. Wessler, D. Shin, B. Saparov, D.B. Mitzi, V. Blum, I<sub>2</sub>-II-IV-VI<sub>4</sub> (I= Cu, Ag; II= Sr, Ba; IV= Ge, Sn; VI= S, Se): Chalcogenides for Thin-Film Photovoltaics, *Chemistry of Materials*, 29 (2017) 7868-7879.
- [26] M. Tampier, D. Johrendt, Kristallstrukturen und chemische Bindung von  $\text{AM}_2\text{GeSe}_4$  (A= Sr, Ba; M= Cu, Ag), *Zeitschrift für anorganische und allgemeine Chemie*, 627 (2001) 312-320.
- [27] J.-P. Sun, G.C. McKeown Wessler, T. Wang, T. Zhu, V. Blum, D.B. Mitzi, Structural tolerance factor approach to defect-resistant I<sub>2</sub>-II-IV-X<sub>4</sub> semiconductor design, *Chemistry of Materials*, 32 (2020) 1636-1649.
- [28] S.P. Ramkumar, Structural, Vibrational, and Electronic Properties of Trigonal  $\text{Cu}_2\text{SrSnS}_4$  Photovoltaic Absorber from First-Principles Calculations, *Material Science Research India*, 17 (2020) 07-12.
- [29] A. Bedjaoui, A. Bouhemadou, S. Aloumi, R. Khenata, S. Bin-Omran, Y. Al-Douri, F.S. Saoud, S. Bensalem, Structural, elastic, electronic and optical properties of the novel quaternary diamond-like semiconductors  $\text{Cu}_2\text{MgSiS}_4$  and  $\text{Cu}_2\text{MgGeS}_4$ , *Solid State Sciences*, 70 (2017) 21-35.
- [30] B.-W. Liu, M.-J. Zhang, Z.-Y. Zhao, H.-Y. Zeng, F.-K. Zheng, G.-C. Guo, J.-S. Huang, Synthesis, structure, and optical properties of the quaternary diamond-like compounds I<sub>2</sub>-II-IV-VI<sub>4</sub> (I= Cu; II= Mg; IV= Si, Ge; VI= S, Se), *Journal of Solid State Chemistry*, 204 (2013) 251-256.
- [31] B. Bekki, K. Amara, M. El Keurti, First-principles study of the new potential photovoltaic absorber:  $\text{Cu}_2\text{MgSnS}_4$  compound, *Chinese Physics B*, 26 (2017) 076201.
- [32] B. Bekki, K. Amara, N. Marbouh, F. Khelfaoui, Y. Benallou, M. Elkeurti, A. Bentayeb, Theoretical study of structural, elastic and thermodynamic properties of  $\text{Cu}_2\text{MgSnX}_4$  (X= S, Se and Te) quaternary compounds, *Computational Condensed Matter*, 18 (2019) e00339.
- [33] C.D. Brunetta, B. Karuppanan, K.A. Rosmus, J.A. Aitken, The crystal and electronic band structure of the diamond-like semiconductor  $\text{Ag}_2\text{ZnSiS}_4$ , *Journal of alloys and compounds*, 516 (2012) 65-72.

- [34] P. Mangelis, A. Aziz, I. da Silva, R. Grau-Crespo, P. Vaqueiro, A.V. Powell, Understanding the origin of disorder in kesterite-type chalcogenides  $A_2ZnBQ_4$  ( $A = Cu, Ag; B = Sn, Ge; Q = S, Se$ ): The influence of inter-layer interactions, *Physical Chemistry Chemical Physics*, 21 (2019) 19311-19317.
- [35] C.D. Brunetta, Structure determination by X-ray diffraction methods and physicochemical characterization of quaternary diamond-like semiconductors, (2013).
- [36] S. Saidi, S. Zriouel, L. Drissi, M. Maaroufi, First principles study of electronic and optical properties of  $Ag_2CdSnS_4$  chalcogenides for photovoltaic applications, *Computational Materials Science*, 152 (2018) 291-299.
- [37] S. Saidi, S. Zriouel, L. Drissi, M. Maaroufi, A DFT study of electro-optical properties of kesterite  $Ag_2CdSnX_4$  for photovoltaic applications, *Physica E: Low-dimensional Systems and Nanostructures*, 103 (2018) 171-179.
- [38] O. Parasyuk, S. Chykhrij, V. Bozhko, L. Piskach, M. Bogdanyuk, I. Olekseyuk, L. Bulatetska, V. Pekhnyo, Phase diagram of the  $Ag_2S-HgS-SnS_2$  system and single crystal preparation, crystal structure and properties of  $Ag_2HgSnS_4$ , *Journal of alloys and compounds*, 399 (2005) 32-37.
- [39] T.V. Vu, A. Lavrentyev, B. Gabrelian, O. Parasyuk, V. Ocheretova, O. Khyzhun, Electronic structure and optical properties of  $Ag_2HgSnSe_4$ : First-principles DFT calculations and X-ray spectroscopy studies, *Journal of Alloys and Compounds*, 732 (2018) 372-384.
- [40] A. Reshak, O. Khyzhun, I. Kityk, A. Fedorchuk, H. Kamarudin, S. Auluck, O. Parasyuk, Electronic structure of quaternary chalcogenide  $Ag_2In_2Ge$  (Si)  $S_6$  single crystals and the influence of replacing Ge by Si: experimental X-ray photoelectron spectroscopy and X-ray diffraction studies and theoretical calculations, *Science of Advanced Materials*, 5 (2013) 316-327.
- [41] G. Myronchuk, O. Zamuruyeva, O. Parasyuk, I. Kityk, P. Czaja, M. Piasecki, The effect of composition on photoconductivity and nonlinear optical properties in the acentric  $Ag_2In_2AB_6$  ( $A = Si, Ge, B = S, Se$ ) crystals, *Optik*, 179 (2019) 948-956.
- [42] M.Y. Rudysh, P. Shchepanskyi, A. Fedorchuk, M. Brik, C.-G. Ma, G. Myronchuk, M. Piasecki, First-principles analysis of physical properties anisotropy for the  $Ag_2SiS_3$  chalcogenide semiconductor, *Journal of Alloys and Compounds*, 826 (2020) 154232.
- [43] A.H. Reshak, M. Jamal, DFT calculation for elastic constants of orthorhombic structure within WIEN2K code: A new package (ortho-elastic), *Journal of alloys and compounds*, 543 (2012) 147-151.
- [44] L.M. de Chalbaud, G.D. De Delgado, J. Delgado, A. Mora, V. Sagredo, Synthesis and single-crystal structural study of  $Cu_2GeS_3$ , *Materials research bulletin*, 32 (1997) 1371-1376.
- [45] G. Marcano, C. Rincón, G. Marín, G. Delgado, A. Mora, J.L. Herrera-Perez, J. Mendoza-Alvarez, P. Rodríguez, Raman scattering and X-ray diffraction study in  $Cu_2GeSe_3$ , *Solid state communications*, 146 (2008) 65-68.
- [46] R. Ávila-Godoy, D. Acosta-Najarro, G. Camargo-E, C. Magaña-Zavala, L. Nieves, S. Paredes-Dugarte, B. Hidalgo-Prada, Structural Characterization of the Layered Compound  $Ag_2SnSe_3$  from Scanning and Transmission Electron Microscopy and Synchrotron Powder Diffraction, *Acta Microscopica*, 27 (2018) 76-82.
- [47] G.-G.P. Braulio, Synthesis, thermal analysis and structural characterization of the ternary compound Ag.
- [48] P. Toffoli, P. Khodadad, N. Rodier, Structure d'une deuxième variété d'hexathiodiphosphate (IV) d'argent,  $Ag_4P_2S_6$ . Comparaison des structures des deux variétés, *Acta Crystallographica Section C: Crystal Structure Communications*, 39 (1983) 1485-1488.
- [49] P. Toffoli, P. Khodadad, N. Rodier, Structure cristalline de l'hexasélénohypodiphosphate d'argent,  $Ag_4P_2Se_6$ , *Acta Crystallographica Section B: Structural Crystallography and Crystal Chemistry*, 34 (1978) 1779-1781.
- [50] W. Yin, A.K. Iyer, C. Li, J. Yao, A. Mar, Noncentrosymmetric chalcogenides  $BaZnSiSe_4$  and  $BaZnGeSe_4$  featuring one-dimensional structures, *Journal of Alloys and Compounds*, 708 (2017) 414-421.

- [51] Y. Guo, F. Liang, M. Zhou, Z. Lin, J. Yao, Y. Wu, BaM<sub>2</sub>As<sub>2</sub>S<sub>6</sub> (M= Cd, Hg): Synthesis, crystal structure, optical and electronic properties, *Journal of Alloys and Compounds*, 762 (2018) 143-148.
- [52] X. Wu, X. Gu, H. Pan, Y. Hu, K. Wu, Synthesis, crystal structures, optical properties and theoretical calculations of two metal chalcogenides Ba<sub>2</sub>AlSbS<sub>5</sub> and Ba<sub>2</sub>GaBiSe<sub>5</sub>, *Crystals*, 8 (2018) 165.
- [53] C. Li, X. Li, H. Huang, J. Yao, Y. Wu, Ba<sub>2</sub>AsGaSe<sub>5</sub>: A New Quaternary Selenide with the Novel [AsGaSe<sub>5</sub>] 4–Cluster and Interesting Photocatalytic Properties, *Inorganic chemistry*, 54 (2015) 9785-9789.
- [54] W. Yin, D. Zhang, M. Zhou, A.K. Iyer, J.-H. Pöhls, J. Yao, A. Mar, Quaternary rare-earth selenides Ba<sub>2</sub>REGaSe<sub>5</sub> and Ba<sub>2</sub>REInSe<sub>5</sub>, *Journal of Solid State Chemistry*, 265 (2018) 167-175.
- [55] X.W. Lei, M. Yang, S.Q. Xia, X.C. Liu, M.Y. Pan, X. Li, X.T. Tao, Synthesis, Structure and Bonding, Optical Properties of Ba<sub>4</sub>MTrQ<sub>6</sub> (M= Cu, Ag; Tr= Ga, In; Q= S, Se), *Chemistry—An Asian Journal*, 9 (2014) 1123-1131.
- [56] Z. Xia, H. Fang, X. Zhang, M.S. Molokeev, R. Gautier, Q. Yan, S.-H. Wei, K.R. Poeppelmeier, CsCu<sub>5</sub>Se<sub>3</sub>: A copper-rich ternary chalcogenide semiconductor with nearly direct band gap for photovoltaic application, *Chemistry of Materials*, 30 (2018) 1121-1126.
- [57] B. Sun, J. He, X. Zhang, K. Bu, C. Zheng, F. Huang, Synthesis, crystal structure and optical properties of K<sub>2</sub>Cu<sub>2</sub>GeS<sub>4</sub>, *Journal of Alloys and Compounds*, 725 (2017) 557-562.
- [58] K.M. Wong, W. Khan, M. Shoaib, U. Shah, S.H. Khan, G. Murtaza, Ab Initio Investigation of the Structural, Electronic and Optical Properties of the Li<sub>2</sub>In<sub>2</sub>XY<sub>6</sub> (X= Si, Ge; Y= S, Se) Compounds, *Journal of Electronic Materials*, 47 (2018) 566-576.
- [59] H. Lin, J.-N. Shen, W.-W. Zhu, Y. Liu, X.-T. Wu, Q.-L. Zhu, L.-M. Wu, Two new phases in the ternary RE–Ga–S systems with the unique interlinkage of GaS 4 building units: synthesis, structure, and properties, *Dalton Transactions*, 46 (2017) 13731-13738.
- [60] Y. Dou, Y. Chen, Z. Li, A.K. Iyer, B. Kang, W. Yin, J. Yao, A. Mar, SrCdGeS<sub>4</sub> and SrCdGeSe<sub>4</sub>: promising infrared nonlinear optical materials with congruent-melting behavior, *Crystal Growth & Design*, 19 (2019) 1206-1214.
- [61] T.V. Vu, A. Lavrentyev, B. Gabrelian, O. Parasyuk, O. Khyzhun, TlInGe<sub>2</sub>S<sub>6</sub>, A Prospective Nonlinear Optical Material: First-Principles DFT Calculations of the Electronic Structure and Optical Properties, *Journal of Electronic Materials*, 47 (2018) 5525-5536.
- [62] T.V. Vu, A. Lavrentyev, B. Gabrelian, O. Parasyuk, O. Khyzhun, First-principles DFT calculations of the electronic structure and optical properties of TlInGe<sub>2</sub>Se<sub>6</sub>, a prospective NLO material, *Materials Chemistry and Physics*, 219 (2018) 162-174.
- [63] T.V. Vu, A. Lavrentyev, B. Gabrelian, H.D. Tong, O. Parasyuk, O. Khyzhun, Electronic band structure and basic optical constants of TlGaSn<sub>2</sub>Se<sub>6</sub>, a promising NLO semiconductor: First-principles calculations under DFT framework, *Optik*, 181 (2019) 673-685.
- [64] C.R. Sankar, A. Assoud, H. Kleinke, New Layered-Type Quaternary Chalcogenides, Tl<sub>2</sub>PbMQ<sub>4</sub> (M= Zr, Hf; Q= S, Se): Structure, Electronic Structure, and Electrical Transport Properties, *Inorganic Chemistry*, 52 (2013) 13869-13874.
- [65] A. Selezhen, I. Olekseyuk, G. Myronchuk, O. Smitiukh, L. Piskach, Synthesis and structure of the new semiconductor compounds Tl<sub>2</sub>BII<sub>2</sub>DIVX<sub>4</sub> (BII–Cd, Hg; DIV–Si, Ge; X–Se, Te) and isothermal sections of the Tl<sub>2</sub>Se–CdSe–Ge (Sn) Se<sub>2</sub> systems at 570 K, *Journal of Solid State Chemistry*, (2020) 121422.
- [66] M.Y. Mozolyuk, L. Piskach, A. Fedorchuk, I. Olekseyuk, O. Parasyuk, The Tl<sub>2</sub>Se–HgSe–GeSe<sub>2</sub> system and the crystal structure of Tl<sub>2</sub>HgGeSe<sub>4</sub>, *Chemistry of metals and alloys*, (2013) 55-62.
- [67] M.Y. Mozolyuk, L. Piskach, A. Fedorchuk, I. Olekseyuk, O. Parasyuk, Physico-chemical interaction in the Tl<sub>2</sub>Se–HgSe–DIVSe<sub>2</sub> systems (DIV–Si, Sn), *Materials Research Bulletin*, 47 (2012) 3830-3834.
- [68] A. Lavrentyev, B. Gabrelian, T.V. Vu, L. Ananchenko, G. Myronchuk, O. Parasyuk, V. Tkach, K. Kopylova, O. Khyzhun, Electronic and optical properties of quaternary sulfide Tl<sub>2</sub>HgSnS<sub>4</sub>, a promising optoelectronic semiconductor: A combined experimental and theoretical study, *Optical Materials*, 92 (2019) 294-302.



- [69] X. Zhang, D. Chen, K. Deng, R. Lu, Band engineering of wurtzite-derived semiconductors  $\text{Cu}_2\text{ZnSiS}_4$  and  $\text{Cu}_2\text{ZnSiSe}_4$ , *Journal of Alloys and Compounds*, 656 (2016) 196-199.
- [70] X. Zhang, D. Rao, R. Lu, K. Deng, D. Chen, First-principles study on electronic and optical properties of  $\text{Cu}_2\text{ZnSiV I}_4$  (VI= S, Se, and Te) quaternary semiconductors, *AIP Advances*, 5 (2015) 057111.
- [71] N. Kodan, S. Auluck, B. Mehta, A DFT study of the electronic and optical properties of a photovoltaic absorber material  $\text{Cu}_2\text{ZnGeS}_4$  using GGA and mBJ exchange correlation potentials, *Journal of Alloys and Compounds*, 675 (2016) 236-243.
- [72] D. Chen, N. Ravindra, Electronic and optical properties of  $\text{Cu}_2\text{ZnGeX}_4$  (X= S, Se and Te) quaternary semiconductors, *Journal of alloys and compounds*, 579 (2013) 468-472.
- [73] G.K. Gupta, R. Chaurasiya, A. Dixit, Theoretical studies on structural, electronic and optical properties of kesterite and stannite  $\text{Cu}_2\text{ZnGe (S/Se)}_4$  solar cell absorbers, *Computational Condensed Matter*, 19 (2019) e00334.
- [74] C.-R. Li, Y.-F. Li, B. Yao, G. Yang, Z.-H. Ding, R. Deng, L. Liu, Electronic and optical properties of kesterite  $\text{Cu}_2\text{ZnSnS}_4$  under in-plane biaxial strains: First-principles calculations, *Physics Letters A*, 377 (2013) 2398-2402.
- [75] H.-R. Liu, S. Chen, Y.-T. Zhai, H.-J. Xiang, X.-G. Gong, S.-H. Wei, First-principles study on the effective masses of zinc-blend-derived  $\text{Cu}_2\text{Zn-IV-VI}_4$  (IV= Sn, Ge, Si and VI= S, Se), *Journal of Applied Physics*, 112 (2012) 093717.
- [76] S. Ullah, H.U. Din, G. Murtaza, T. Ouahrani, R. Khenata, S.B. Omran, Structural, electronic and optical properties of  $\text{AgXY}_2$  (X= Al, Ga, In and Y= S, Se, Te), *Journal of alloys and compounds*, 617 (2014) 575-583.
- [77] A. Lavrentyev, B. Gabrelian, V. Vu, P. Shkumat, V. Ocheretova, O. Parasyuk, O. Khyzhun, Electronic structure and optical properties of  $\text{Cu}_2\text{CdGeS}_4$ : DFT calculations and X-ray spectroscopy measurements, *Optical Materials*, 47 (2015) 435-444.
- [78] H. Ahmoum, M. Su'ait, G. Li, S. Chopra, M. Boughrara, Q. Wang, M. Kerouad, D. Rai, Electronic and thermoelectric properties of chalcopyrite compounds  $\text{Cu}_2(\text{XY})\text{S}_4$  (X= Zn, Cd and Y= Sn, Pb): first-principles study, *Indian Journal of Physics*, (2020) 1-7.
- [79] F. Liu, J. Zheng, M. Huang, L. He, W. Ao, F. Pan, J. Li, Enhanced thermoelectric performance of  $\text{Cu}_2\text{CdSnSe}_4$  by Mn doping: experimental and first principles studies, *Scientific reports*, 4 (2014) 1-7.
- [80] N. Sarmadian, R. Saniz, B. Partoens, D. Lamoen, First-principles study of the optoelectronic properties and photovoltaic absorber layer efficiency of Cu-based chalcogenides, *Journal of Applied Physics*, 120 (2016) 085707.
- [81] D. Li, X. Zhang, Z. Zhu, H. Zhang, F. Ling, Ab initio calculations of structural, electronic, and optical properties of  $\text{Cu}_2\text{HgSnSe}_4$ , *Solid state sciences*, 14 (2012) 890-893.
- [82] S. Azam, M. Irfan, Z. Abbas, S.A. Khan, I.V. Kityk, T. Kanwal, M. Sohail, S. Muhammad, A.G. Al-Sehemi, Effect of S and Se replacement on electronic and thermoelectric features of  $\text{BaCu}_2\text{GeQ}_4$  (Q= S, Se) chalcogenide crystals, *Journal of Alloys and Compounds*, 790 (2019) 666-674.
- [83] Y. Yang, K. Wu, X. Wu, B. Zhang, L. Gao, A new family of quaternary thiosilicates  $\text{SrA}_2\text{SiS}_4$  (A= Li, Na, Cu) as promising infrared nonlinear optical crystals, *Journal of Materials Chemistry C*, 8 (2020) 1762-1767.
- [84] F. Hong, W. Lin, W. Meng, Y. Yan, Trigonal  $\text{Cu}_2\text{-II-Sn-VI}_4$  (II= Ba, Sr and VI= S, Se) quaternary compounds for earth-abundant photovoltaics, *Physical Chemistry Chemical Physics*, 18 (2016) 4828-4834.
- [85] S. Sharma, P. Kumar, Quaternary semiconductors  $\text{Cu}_2\text{MgSnS}_4$  and  $\text{Cu}_2\text{MgSnSe}_4$  as potential thermoelectric materials, *Journal of Physics Communications*, 1 (2017) 045014.
- [86] M. Rasukkannu, D. Velauthapillai, P. Vajeeston, Hybrid Density Functional Study of  $\text{Au}_2\text{Cs}_2\text{I}_6$ ,  $\text{Ag}_2\text{GeBaS}_4$ ,  $\text{Ag}_2\text{ZnSnS}_4$ , and  $\text{AgCuPO}_4$  for the Intermediate Band Solar Cells, *Energies*, 11 (2018) 3457.

- [87] S. Nakamura, T. Maeda, T. Tabata, T. Wada, First-principles study of indium-free photovoltaic compounds  $\text{Ag}_2\text{ZnSnSe}_4$  and  $\text{Cu}_2\text{ZnSnSe}_4$ , in: 2011 37th IEEE Photovoltaic Specialists Conference, IEEE, 2011, pp. 002771-002774.
- [88] L. Wei, W. Fan, Y. Li, X. Zhao, L. Yang, Effect of cation ordering on the electronic and lattice dynamic properties of  $\text{Ag}_2\text{CdGeS}_4$  polytypes: First-principle calculation, *Journal of Solid State Chemistry*, 201 (2013) 48-55.
- [89] L. Dan, Z. Xing-Hong, Theoretical studies on the structural, electronic, and optical properties of  $\text{Ag}_2\text{HgSnSe}_4$ , *Chinese Physics B*, 20 (2011) 126102.
- [90] H. Shao, X. Tan, T. Hu, G.-Q. Liu, J. Jiang, H. Jiang, First-principles study on the lattice dynamics and thermodynamic properties of  $\text{Cu}_2\text{GeSe}_3$ , *EPL (Europhysics Letters)*, 109 (2015) 47004.
- [91] M. Ali, M.A. Hossain, M. Rayhan, M. Hossain, M. Uddin, M. Roknuzzaman, K. Ostrikov, A. Islam, S. Naqib, First-principles study of elastic, electronic, optical and thermoelectric properties of newly synthesized  $\text{K}_2\text{Cu}_2\text{GeS}_4$  chalcogenide, *Journal of Alloys and Compounds*, 781 (2019) 37-46.
- [92] S. Azam, S.A. Khan, J. Minar, W. Khan, H.U. Din, R. Khenata, G. Murtaza, S. Bin-Omran, S. Goumri-Said, Coulomb interaction and spin-orbit coupling calculations of thermoelectric properties of the quaternary chalcogenides  $\text{Tl}_2\text{PbXY}_4$  (X= Zr, Hf and Y= S, Se), *Semiconductor Science and Technology*, 30 (2015) 105018.
